# Supplementary material for: A small number of workers with specific personality traits perform tool use in ants
Source: eLife. 2020 Dec 9;9:e61298. doi: 10.7554/eLife.61298 (PMC7725502; doi:10.7554/eLife.61298)
Supplement: Figure 1—source data 1. — The time required for the transport of each tool during consecutive transports by the same worker within a trail was analysed with LMM (Gaussian error, maximum likelihood fit). Only workers that performed four consecutive transports were included in the analysis (N = 54; second-third tool: p=0.03, second-fourth tool: p<0.001). [file elife-61298-fig1-data1.xlsx]

## Sheet: Munka1
ID	Time of transport of the second tool	Time of transport of the third tool	Time of transport of the fourth tool		The time (seconds) needed to transport one tool for individual workers that transported four consecutive tools within the same trial
1	120	106	40
2	48	30	40		Column B: Time to trasport the second tool
3	119	47	31		Column C: Time to transport the third tool
4	366	101	19		Column D: Time to transport of the fourth tool
5	79	465	73
6	50	24	22
7	190	50	27
9	158	36	94
10	58	69	25
11	35	33	45
13	43	4	31
14	452	195	33
15	487	81	23
16	26	34	19
17	52	24	20
18	42	38	18
20	23	37	79
21	137	78	78
