# Supplementary material for: A small number of workers with specific personality traits perform tool use in ants
Source: eLife. 2020 Dec 9;9:e61298. doi: 10.7554/eLife.61298 (PMC7725502; doi:10.7554/eLife.61298)
Supplement: Figure 1—source data 2. — The average time needed to transport one tool by the same worker between the trials was analysed with LMM (Gaussian error, maximum likelihood fit). Up to three trials were included (N = 29; first-second trial: p=0.99; first-third trials: p=0.32). [file elife-61298-fig1-data2.xlsx]

## Sheet: Munka1
ID	First trial	Second trial	Third trial		The time (seconds) needed to transport one tool for individual workers that transported at least two consecutive tools in different trials
1	28.6	75.25	45.5
2	128	127.333	41.3333		B: The average time needed to transport one tool in the first trial
3	60	69.76	48.8		C: The average time needed to transport one tool in the second trial
4	225	101	145		D: The average time needed to transport one tool in the third trial
5	37.6667	26	60
6	70	55.5
7	42.6667	40
8	223	514
9	55	351
10	115	27
11	1168	44
12	123.75	1260
