# Supplementary material for: A small number of workers with specific personality traits perform tool use in ants
Source: eLife. 2020 Dec 9;9:e61298. doi: 10.7554/eLife.61298 (PMC7725502; doi:10.7554/eLife.61298)
Supplement: Figure 2—source data 1. — The effect of the pre-trial on the latency to bring the first tool to the bait in the first trial was analysed with LMM (Gaussian error, maximum likelihood fit). All colonies (N = 6) and subcolonies (N = 12) were included (p=0.64). [file elife-61298-fig2-data1.xlsx]

## Sheet: Munka1
ID	Colony ID	Subcolony 1	Subcolony 2		Effect of the pre-trial in experiment 2:
1	Col2	1346	447		Latency (seconds) to transport the first tool to the bait by the two subcolonies with and without a pre-trial
2	Col4	3378	3112
3	Col14	105	664		C: Sub-colonies 1: without a pre-trial, received first food and then tools in absence of the food
4	Col17	396	750		D: Sub-colonies 2: had a pre-trial, received liquid food and tools simultaneously
5	Col19	207	80
6	Col20	2524	330
