# Supplementary material for: A small number of workers with specific personality traits perform tool use in ants
Source: eLife. 2020 Dec 9;9:e61298. doi: 10.7554/eLife.61298 (PMC7725502; doi:10.7554/eLife.61298)
Supplement: Figure 2—source data 2. — The effect of the pre-trial on the total transport time observed during the subsequent first trial was analysed with LMM (Gaussian error, maximum likelihood fit). All colonies (N = 6) and subcolonies (N = 12) were included (p=0.42). [file elife-61298-fig2-data2.xlsx]

## Sheet: Munka1
ID	Colony ID	Subcolony 1	Subcolony 2		Effect of the pre-trial in experiment 2:
1	Col2	596	384		The total time (seconds) needed to transport the ten tools to the bait by the two subcolonies with and without a pre-trial
2	Col4	772	639
3	Col14	305	962		C: Sub-colonies 1: without a pre-trial, received first food and then tools in absence of the food
4	Col17	624	350		D: Sub-colonies 2: had a pre-trial, received liquid food and tools simultaneously
5	Col19	403	87
6	Col20	724	558
