# Supplementary material for: A small number of workers with specific personality traits perform tool use in ants
Source: eLife. 2020 Dec 9;9:e61298. doi: 10.7554/eLife.61298 (PMC7725502; doi:10.7554/eLife.61298)
Supplement: Figure 3—source data 1. — Repeatability across the two sessions, for each individual ant, concerning the time spent walking in the central area was assessed with intra-class correlation (Lessells and Boag, 1987) by using LMM (Nakagawa and Schielzeth, 2010). The total time spent in the central area were significantly repeatable across the two sessions (N = 154; p<0.0001). Six ants died between the two sessions of the personality tests, therefore the sample size is 154 ants instead of 160 (20 ants in each of the eight sub-colonies). [file elife-61298-fig3-data1.xlsx]

## Sheet: Munka1
ID	Total time in central area 1	Total time in central area 2		Correlation between the two sessions of the time (seconds) spent walking in the central area (open-field test)
1	55	98
2	23	38		B,C: Time spent walking in the central area of the open field during session 1 and session 2
3	33	48
4	34	6
5	26	56
6	27	46
7	43	39
8	63	57
9	36	55
10	55	57
11	18	13
12	28	4
13	80	79
14	55	46
15	28	41
16	17	62
17	55	3
18	19	19
19	18	21
20	42	41
21	48	47
22	84	46
23	40	4
24	27	26
25	37	102
26	42	62
27	52	32
28	28	22
29	75	88
30	30	49
31	90	54
32	67	66
33	37	41
34	20	27
35	12	13
36	19	14
37	70	65
38	31	43
39	22	52
40	43	37
41	55	32
42	30	25
43	27	2
44	36	31
45	43	35
46	42	42
47	40	47
48	38	34
49	37	21
50	25	19
51	38	25
52	50	52
53	29	35
54	49	38
55	16	18
56	32	36
57	42	44
58	25	6
59	43	58
60	64	143
61	29	45
62	57	46
63	53	75
64	50	46
65	42	34
66	42	46
67	59	63
68	45	41
69	66	69
70	50	36
71	56	47
72	39	33
73	34	29
74	54	33
75	26	24
76	46	32
77	40	52
78	41	48
79	51	55
80	47	36
81	30	34
82	48	51
83	40	38
84	62	43
85	39	69
86	61	43
87	46	44
88	34	51
89	57	55
90	33	46
91	42	48
92	32	23
93	46	41
94	43	5
95	31	38
96	80	44
97	33	68
98	37	48
99	48	51
100	21	22
101	45	39
102	16	35
103	36	41
104	24	27
105	23	54
106	36	26
107	45	51
108	43	4
109	46	44
110	21	26
111	6	29
112	35	28
113	49	23
114	37	28
115	19	15
116	36	16
117	45	46
118	27	28
119	43	25
120	20	39
121	25	42
122	18	43
123	70	72
124	37	63
125	28	29
126	26	39
127	33	31
128	30	27
129	72	6
130	32	37
131	37	4
132	44	4
133	49	36
134	23	19
135	23	23
136	30	31
137	73	49
138	54	31
139	20	29
140	39	52
141	40	38
142	68	19
143	43	26
144	13	1
145	41	46
146	43	36
147	45	38
148	40	5
149	18	14
150	10	9
151	20	15
152	46	33
153	11	13
154	29	34
