# Supplementary material for: A small number of workers with specific personality traits perform tool use in ants
Source: eLife. 2020 Dec 9;9:e61298. doi: 10.7554/eLife.61298 (PMC7725502; doi:10.7554/eLife.61298)
Supplement: Figure 3—source data 2. — Repeatability across the two sessions, for each individual ant, concerning the time spent in contact with the prey was assessed with intra-class correlation (Lessells and Boag, 1987) by using LMM (Nakagawa and Schielzeth, 2010). The time spent in contact with the prey was highly repeatable (N = 154; p<0.0001). Six ants died between the two sessions of the personality tests, therefore the sample size is 154 ants instead of 160 (20 ants in each of the eight sub-colonies). [file elife-61298-fig3-data2.xlsx]

## Sheet: Munka1
ID	Time spent in contact with prey 1	Time spent in contact with prey 2		Correlation between the two sessions of the time (seconds) spent in contact with the prey (reaction to prey test)
1	4	3
2	8	3		B,C: Time spent in contact with the prey during session 1 and session 2
3	161	168
4	4	3
5	0	3
6	166	1
7	7	1
8	2	1
9	11	3
10	170	144
11	0	0
12	4	1
13	9	157
14	16	0
15	0	0
16	3	2
17	1	1
18	1	1
19	0	1
20	1	1
21	8	2
22	172	161
23	9	2
24	3	0
25	2	1
26	1	2
27	111	145
28	2	8
29	5	2
30	3	3
31	1	21
32	6	3
33	1	1
34	1	0
35	1	1
36	0	1
37	2	0
38	0	0
39	1	0
40	0	0
41	2	0
42	2	2
43	2	3
44	5	4
45	3	5
46	5	0
47	166	9
48	10	5
49	8	41
50	5	1
51	3	0
52	1	157
53	0	0
54	6	0
55	0	0
56	1	1
57	1	2
58	2	1
59	2	1
60	2	9
61	9	4
62	5	4
63	0	2
64	6	0
65	3	0
66	131	2
67	6	15
68	3	4
69	5	5
70	1	4
71	9	1
72	0	3
73	1	0
74	4	0
75	2	1
76	0	0
77	2	0
78	12	1
79	6	0
80	1	4
81	2	4
82	3	1
83	5	3
84	5	5
85	6	2
86	8	4
87	3	2
88	4	9
89	2	1
90	5	3
91	1	1
92	1	1
93	1	0
94	0	1
95	0	1
96	2	1
97	4	7
98	8	4
99	2	2
100	6	2
101	9	3
102	4	3
103	0	0
104	1	3
105	3	13
106	4	1
107	4	2
108	5	6
109	0	0
110	6	3
111	1	1
112	1	1
113	0	1
114	2	0
115	1	0
116	18	20
117	79	83
118	11	6
119	5	2
120	2	4
121	4	2
122	1	2
123	7	19
124	171	164
125	5	1
126	10	30
127	4	22
128	5	4
129	174	70
130	0	1
131	1	0
132	1	0
133	0	0
134	0	0
135	1	1
136	1	2
137	2	1
138	7	143
139	2	1
140	170	167
141	2	0
142	15	2
143	3	15
144	10	2
145	3	6
146	148	159
147	128	4
148	9	5
149	11	153
150	1	1
151	0	0
152	0	0
153	0	1
154	0	0
