# Supplementary material for: A small number of workers with specific personality traits perform tool use in ants
Source: eLife. 2020 Dec 9;9:e61298. doi: 10.7554/eLife.61298 (PMC7725502; doi:10.7554/eLife.61298)
Supplement: Figure 5—source data 1. — A ‘personality score’ for each ant was calculated with a Principal Component Analysis based on (a) total time spent in the central area of the open field, (b) time spent walking in the periphery, (c) time spent in contact with the prey (average of the two sessions for each variable). The figures show the average values of the two sessions used to study the behaviours observed in the two personality tests: open-field and reaction to prey (N = 154). Six ants died between the two sessions of the personality tests, therefore the sample size is 154 ants instead of 160 (20 ants in each of the eight sub-colonies). [file elife-61298-fig5-data1.xlsx]

## Sheet: Munka1
ID	Colony ID	Tool_User	Walk Periphery	Total Center	Contact Prey		Variables used in the Principal Component Analysis
1	A22	No	90.5	76.5	3.5
2	A22	Yes	94	30.5	5.5		D: Time (seconds) spent walking in the periphery of the open field
3	A22	Yes	114	40.5	164.5		E: Total time (seconds) spent in the central area of the open field
4	A22	No	114.5	47	3.5		F: Time (seconds) spent in contact with the prey
5	A22	Yes	122	41	1.5
6	A22	Yes	123.5	36.5	83.5		All variables are average of the two sessions of each personality test
7	A22	No	121.5	41	4
8	A22	No	88.5	60	1.5
9	A22	No	124.5	45.5	7
10	A22	Yes	97.5	56	157
11	A22	No	134	15.5	0
12	A22	No	120	34	2.5
13	A22	Yes	92.5	79.5	83
14	A22	No	92.5	50.5	8
15	A22	No	119	34.5	0
16	A22	No	135	39.5	2.5
17	A22	No	121.5	29	1
18	A22	No	136.5	19	1
19	A22	No	141	19.5	0.5
20	A20	No	120	41.5	1
21	A20	Yes	121.5	47.5	5
22	A20	Yes	107.5	65	166.5
23	A20	No	134.5	40	5.5
24	A20	No	137.5	26.5	1.5
25	A20	Yes	90.5	69.5	1.5
26	A20	No	115.5	52	1.5
27	A20	Yes	122	42	128
28	A20	Yes	151	25	5
29	A20	No	96	81.5	3.5
30	A20	No	136	39.5	3
31	A20	Yes	99	72	11
32	A20	Yes	100.5	66.5	4.5
33	A20	No	139.5	39	1
34	A20	No	153	23.5	0.5
35	A20	No	165.5	12.5	1
36	A20	No	156.5	16.5	0.5
37	A20	No	109	67.5	1
38	A20	No	141.5	37	0
39	A19	No	120	37	0.5
40	A19	No	128.5	40	0
41	A19	No	132	43.5	1
42	A19	No	140	27.5	2
43	A19	Yes	113	23.5	2.5
44	A19	Yes	140	33.5	4.5
45	A19	No	130	39	4
46	A19	No	133.5	42	2.5
47	A19	Yes	117	43.5	87.5
48	A19	Yes	122	36	7.5
49	A19	Yes	143.5	29	24.5
50	A19	No	149	22	3
51	A19	No	137	31.5	1.5
52	A19	Yes	116.5	51	79
53	A19	No	140	32	0
54	A19	No	131	43.5	3
55	A19	No	138	17	0
56	A19	No	139	34	1
57	A19	No	124.5	43	1.5
58	A19	No	131	42.5	1.5
59	A5	No	118.5	50.5	1.5
60	A5	No	68.5	103.5	5.5
61	A5	Yes	129	37	6.5
62	A5	No	116.5	51.5	4.5
63	A5	No	103.5	64	1
64	A5	Yes	87	48	3
65	A5	No	140	38	1.5
66	A5	Yes	131	44	66.5
67	A5	Yes	113.5	61	10.5
68	A5	No	129	43	3.5
69	A5	Yes	109.5	67.5	5
70	A5	Yes	120.5	43	2.5
71	A5	No	110.5	51.5	5
72	A5	No	127.5	36	1.5
73	A5	No	144.5	31.5	0.5
74	A5	No	126.5	43.5	2
75	A5	No	125	25	1.5
76	A5	No	114.5	39	0
77	A14	No	106	46	1
78	A14	No	119.5	44.5	6.5
79	A14	Yes	98.5	53	3
80	A14	Yes	127	41.5	2.5
81	A14	No	123.5	32	3
82	A14	No	122.5	49.5	2
83	A14	Yes	137.5	39	4
84	A14	No	102.5	52.5	5
85	A14	No	108.5	54	4
86	A14	No	109.5	52	6
87	A14	No	124.5	45	2.5
88	A14	No	112.5	42.5	6.5
89	A14	Yes	80.5	56	1.5
90	A14	Yes	115.5	39.5	4
91	A14	No	130	45	1
92	A14	No	145	27.5	1
93	A14	No	105.5	43.5	0.5
94	A14	Yes	124	46.5	0.5
95	A14	No	143.5	34.5	0.5
96	A21	No	99.5	62	1.5
97	A21	Yes	122	50.5	5.5
98	A21	Yes	123.5	42.5	6
99	A21	Yes	121	49.5	2
100	A21	No	143.5	21.5	4
101	A21	Yes	127.5	42	6
102	A21	Yes	124.5	25.5	3.5
103	A21	No	137	38.5	0
104	A21	No	142.5	25.5	2
105	A21	Yes	135	38.5	8
106	A21	Yes	134	31	2.5
107	A21	No	103	48	3
108	A21	Yes	124.5	41.5	5.5
109	A21	No	126	45	0
110	A21	No	154	23.5	4.5
111	A21	No	77	17.5	1
112	A21	No	146	31.5	1
113	A21	No	136.5	36	0.5
114	A21	Yes	144	32.5	1
115	A21	No	149	17	0.5
116	A4	Yes	131	26	19
117	A4	Yes	122	45.5	81
118	A4	Yes	150.5	27.5	8.5
119	A4	No	106	34	3.5
120	A4	Yes	64	29.5	3
121	A4	Yes	139	33.5	3
122	A4	No	135	30.5	1.5
123	A4	Yes	96.5	71	13
124	A4	Yes	118.5	50	167.5
125	A4	No	128.5	28.5	3
126	A4	No	139	32.5	20
127	A4	Yes	125.5	32	13
128	A4	No	142.5	28.5	4.5
129	A4	Yes	102.5	66	122
130	A4	No	144	34.5	0.5
131	A4	No	139.5	38.5	0.5
132	A4	No	116	42	0.5
133	A4	No	134.5	42.5	0
134	A4	No	153.5	21	0
135	A17	Yes	98.5	23	1
136	A17	No	140.5	30.5	1.5
137	A17	No	116.5	61	1.5
138	A17	Yes	118	42.5	75
139	A17	No	135.5	24.5	1.5
140	A17	No	124	45.5	168.5
141	A17	No	117	39	1
142	A17	Yes	121	43.5	8.5
143	A17	No	142	34.5	9
144	A17	No	147.5	11.5	6
145	A17	No	131.5	43.5	4.5
146	A17	Yes	118.5	39.5	153.5
147	A17	Yes	117.5	41.5	66
148	A17	Yes	127.5	45	7
149	A17	Yes	157.5	16	82
150	A17	No	170	9.5	1
151	A17	No	136.5	17.5	0
152	A17	No	137.5	39.5	0
153	A17	No	155.5	12	0.5
154	A17	No	127.5	31.5	0
155	A17	No	9.5	170	1
156	A17	No	17.5	136.5	0
157	A17	No	39.5	137.5	0
158	A17	No	12	155.5	0.5
159	A17	No	31.5	127.5	0

## Sheet: Munka2
Walk Periphery	Total Center	Contact Prey
