# Supplementary material for: A small number of workers with specific personality traits perform tool use in ants
Source: eLife. 2020 Dec 9;9:e61298. doi: 10.7554/eLife.61298 (PMC7725502; doi:10.7554/eLife.61298)
Supplement: Figure 5—source data 2. — The personality score of a given ant is represented by its individual value related to the first principal component, accounting for the 59.14% of the total variance, normalised by subtracting the mean value for its colony. The link between personality score and tool use behaviour (tool user or not) was analysed with a GLMM, binomial error structure (logit-link). The ants’ personality score significantly predicted the probability to use tools in at least one trial (N = 154, p<0.001). Six ants died between the two sessions of the personality tests, therefore the sample size is 154 ants instead of 160 (20 ants in each of the eight sub-colonies). [file elife-61298-fig5-data2.xlsx]

## Sheet: Munka1
ID	Colony ID	Tool_User	Personality score normalized		Differences in personality score between tool user and non-tool user workers
1	A22	No	2.25854
2	A22	Yes	0.0587547		D: The personality score is the first principal component normalized by subtracting the mean value of the colony
3	A22	Yes	1.06917
4	A22	No	0.0499826
5	A22	Yes	-0.510107
6	A22	Yes	-0.108554
7	A22	No	-0.471879
8	A22	No	1.56544
9	A22	No	-0.35194
10	A22	Yes	2.31001
11	A22	No	-2.1147
12	A22	No	-0.74758
13	A22	Yes	2.96249
14	A22	No	1.04152
15	A22	No	-0.708803
16	A22	No	-1.04075
17	A22	No	-1.04104
18	A22	No	-2.03818
19	A22	No	-2.18239
20	A20	No	-0.0963842
21	A20	Yes	0.154029
22	A20	Yes	2.75592
23	A20	No	-0.653145
24	A20	No	-1.40708
25	A20	Yes	2.24716
26	A20	No	0.547412
27	A20	Yes	0.876476
28	A20	Yes	-1.93569
29	A20	No	2.60918
30	A20	No	-0.750279
31	A20	Yes	2.12951
32	A20	Yes	1.77308
33	A20	No	-0.915783
34	A20	No	-2.11245
35	A20	No	-3.06048
36	A20	No	-2.55706
37	A20	No	1.48264
38	A20	No	-1.08706
39	A19	No	0.386625
40	A19	No	0.21117
41	A19	No	0.25149
42	A19	No	-0.756716
43	A19	Yes	0.0429795
44	A19	Yes	-0.464084
45	A19	No	0.143663
46	A19	No	0.141145
47	A19	Yes	1.49092
48	A19	Yes	0.325173
49	A19	Yes	-0.634122
50	A19	No	-1.32424
51	A19	No	-0.47048
52	A19	Yes	1.78121
53	A19	No	-0.568441
54	A19	No	0.303791
55	A19	No	-1.1773
56	A19	No	-0.433358
57	A19	No	0.50429
58	A19	No	0.246296
59	A5	No	0.000788128
60	A5	No	4.24999
61	A5	Yes	-0.952163
62	A5	No	0.142755
63	A5	No	1.15286
64	A5	Yes	1.03955
65	A5	No	-1.34518
66	A5	Yes	-0.223545
67	A5	Yes	0.731122
68	A5	No	-0.703814
69	A5	Yes	1.12684
70	A5	Yes	-0.404185
71	A5	No	0.363968
72	A5	No	-0.983541
73	A5	No	-1.81133
74	A5	No	-0.602689
75	A5	No	-1.39264
76	A5	No	-0.388797
77	A14	No	0.479398
78	A14	No	-0.0331139
79	A14	Yes	1.0849
80	A14	Yes	-0.473055
81	A14	No	-0.773801
82	A14	No	0.0491471
83	A14	Yes	-0.954597
84	A14	No	0.933508
85	A14	No	0.776396
86	A14	No	0.665467
87	A14	No	-0.2236
88	A14	No	0.129436
89	A14	Yes	1.86064
90	A14	Yes	-0.135538
91	A14	No	-0.434765
92	A14	No	-1.77253
93	A14	No	0.379928
94	A14	Yes	-0.153479
95	A14	No	-1.40434
96	A21	No	2.22045
97	A21	Yes	0.915905
98	A21	Yes	0.502296
99	A21	Yes	0.878505
100	A21	No	-1.19152
101	A21	Yes	0.334796
102	A21	Yes	-0.326124
103	A21	No	-0.216352
104	A21	No	-0.98976
105	A21	Yes	-0.0795438
106	A21	Yes	-0.428259
107	A21	No	1.46999
108	A21	Yes	0.416655
109	A21	No	0.477035
110	A21	No	-1.47674
111	A21	No	1.0098
112	A21	No	-0.852
113	A21	No	-0.30777
114	A21	Yes	-0.734188
115	A21	No	-1.62317
116	A4	Yes	-0.760756
117	A4	Yes	0.949856
118	A4	Yes	-1.48303
119	A4	No	0.382726
120	A4	Yes	1.69463
121	A4	Yes	-0.838533
122	A4	No	-0.842071
123	A4	Yes	2.48353
124	A4	Yes	1.97738
125	A4	No	-0.685543
126	A4	No	-0.747074
127	A4	Yes	-0.337474
128	A4	No	-1.18023
129	A4	Yes	2.91688
130	A4	No	-0.994234
131	A4	No	-0.649675
132	A4	No	0.359932
133	A4	No	-0.291043
134	A4	No	-1.95527
135	A17	Yes	0.550225
136	A17	No	-0.625424
137	A17	No	1.62855
138	A17	Yes	1.32582
139	A17	No	-0.716939
140	A17	No	1.99771
141	A17	No	0.607243
142	A17	Yes	0.727216
143	A17	No	-0.437665
144	A17	No	-1.7055
145	A17	No	0.314934
146	A17	Yes	1.80352
147	A17	Yes	1.22604
148	A17	Yes	0.54798
149	A17	Yes	-1.25119
150	A17	No	-2.65104
151	A17	No	-1.08313
152	A17	No	-0.120153
153	A17	No	-2.01666
154	A17	No	-0.121514
