# Supplementary material for: A small number of workers with specific personality traits perform tool use in ants
Source: eLife. 2020 Dec 9;9:e61298. doi: 10.7554/eLife.61298 (PMC7725502; doi:10.7554/eLife.61298)
Supplement: Source data 1. [file elife-61298-data1.xlsx]

## Sheet: General data
ColID	Trial	Workinarena	Firsttoolbait	Tottime	Workinvolv	Firsttoolnest
Col24	1	19	9	21	2	174		Tool use process in whole colonies
Col27	1	6	26	22	5	111
Col28	1	16	45	20	3	0		Column C: Number of workers in the arena before reconnecting the bridge
Col24	2	43	19	19	2	0		D: Latency (min) to drop the first tool into the bait
Col27	2	14	7	20	2	96		E: Total time (min) of tool transport
Col28	2	9	7	6	2	172		F: Number of workers involved in tool use
Col24	3	16	23	15	3	201		G: Latency (min) to transport the first tool inside the nest
Col27	3	40	1	15	3	0
Col28	3	23	7	7	1	222
Col24	4	23	13	37	2	0
Col27	4	30	3	25	2	144
Col28	4	4	18	24	1	178
Col24	5	29	4	23	2	0
Col27	5	71	2	10	3	126
Col28	5	7	120	31	2	214

## Sheet: Tool users Latencies
ColID	TrialID	Latcontacttoolfood	Latfirsttoolonbait
Col28	1	182	46		Paint marked tool users
Col28	1	80	16
Col28	2	417	8		Column C: Latency (seconds) to contact the tools after having contacted the food
Col28	2	56	8		D: Latency (seconds) to drop the first tool into the bait after having contacted both the food and the tools
Col28	3	52	181
Col28	4	246	788
Col28	5	5	823
Col28	5	55	65
Col27	1	28	223
Col27	4	54	37
Col27	4	60	31
Col24	2	1535	19
Col24	3	2072	13
Col24	4	118	662
Col24	4	847	1955
Col24	5	158	41
Col24	5	543	944
Col24	5	476	1082
