# Supplementary material for: A small number of workers with specific personality traits perform tool use in ants
Source: eLife. 2020 Dec 9;9:e61298. doi: 10.7554/eLife.61298 (PMC7725502; doi:10.7554/eLife.61298)
Supplement: Source data 2. [file elife-61298-data2.xlsx]

## Sheet: Repeatability of tool use
Line.NR	Colony	Subcolony	Trial	ID.ant	Tool.users
1	2	1	1	A.1	1
2	2	1	1	A.2	1		Column E: ID.ant = Individual ant ID
3	2	1	1	A.3	1		F: Tool user = 1; Non-tool user = 0
4	2	1	1	A.4	1
5	2	1	1	A.5	0
6	2	1	1	A.6	0
7	2	1	1	A.7	0
8	2	1	1	A.8	0
9	2	1	1	A.9	0
10	2	1	1	A.10	0
11	2	1	1	A.11	0
12	2	1	1	A.12	0
13	2	1	1	A.13	0
14	2	1	1	A.14	0
15	2	1	1	A.15	0
16	2	1	1	A.16	0
17	2	1	1	A.17	0
18	2	1	1	A.18	0
19	2	1	1	A.19	0
20	2	1	1	A.20	0
21	2	1	1	A.21	0
22	2	1	1	A.22	0
23	2	1	1	A.23	0
24	2	1	1	A.24	0
25	2	1	1	A.25	0
26	2	1	1	A.26	0
27	2	1	1	A.27	0
28	2	1	1	A.28	0
29	2	1	1	A.29	0
30	2	1	1	A.30	0
31	2	1	1	A.31	0
32	2	1	1	A.32	0
33	2	1	1	A.33	0
34	2	1	1	A.34	0
35	2	1	1	A.35	0
36	2	1	1	A.36	0
37	2	1	1	A.37	0
38	2	1	1	A.38	0
39	2	1	1	A.39	0
40	2	1	1	A.40	0
41	2	1	2	A.1	0
42	2	1	2	A.2	0
43	2	1	2	A.3	0
44	2	1	2	A.4	0
45	2	1	2	A.5	1
46	2	1	2	A.6	1
47	2	1	2	A.7	1
48	2	1	2	A.8	0
49	2	1	2	A.9	0
50	2	1	2	A.10	0
51	2	1	2	A.11	0
52	2	1	2	A.12	0
53	2	1	2	A.13	0
54	2	1	2	A.14	0
55	2	1	2	A.15	0
56	2	1	2	A.16	0
57	2	1	2	A.17	0
58	2	1	2	A.18	0
59	2	1	2	A.19	0
60	2	1	2	A.20	0
61	2	1	2	A.21	0
62	2	1	2	A.22	0
63	2	1	2	A.23	0
64	2	1	2	A.24	0
65	2	1	2	A.25	0
66	2	1	2	A.26	0
67	2	1	2	A.27	0
68	2	1	2	A.28	0
69	2	1	2	A.29	0
70	2	1	2	A.30	0
71	2	1	2	A.31	0
72	2	1	2	A.32	0
73	2	1	2	A.33	0
74	2	1	2	A.34	0
75	2	1	2	A.35	0
76	2	1	2	A.36	0
77	2	1	2	A.37	0
78	2	1	2	A.38	0
79	2	1	2	A.39	0
80	2	1	2	A.40	0
81	2	1	3	A.1	0
82	2	1	3	A.2	0
83	2	1	3	A.3	0
84	2	1	3	A.4	0
85	2	1	3	A.5	0
86	2	1	3	A.6	0
87	2	1	3	A.7	0
88	2	1	3	A.8	1
89	2	1	3	A.9	1
90	2	1	3	A.10	1
91	2	1	3	A.11	1
92	2	1	3	A.12	1
93	2	1	3	A.13	0
94	2	1	3	A.14	0
95	2	1	3	A.15	0
96	2	1	3	A.16	0
97	2	1	3	A.17	0
98	2	1	3	A.18	0
99	2	1	3	A.19	0
100	2	1	3	A.20	0
101	2	1	3	A.21	0
102	2	1	3	A.22	0
103	2	1	3	A.23	0
104	2	1	3	A.24	0
105	2	1	3	A.25	0
106	2	1	3	A.26	0
107	2	1	3	A.27	0
108	2	1	3	A.28	0
109	2	1	3	A.29	0
110	2	1	3	A.30	0
111	2	1	3	A.31	0
112	2	1	3	A.32	0
113	2	1	3	A.33	0
114	2	1	3	A.34	0
115	2	1	3	A.35	0
116	2	1	3	A.36	0
117	2	1	3	A.37	0
118	2	1	3	A.38	0
119	2	1	3	A.39	0
120	2	1	3	A.40	0
121	2	1	4	A.1	0
122	2	1	4	A.2	0
123	2	1	4	A.3	1
124	2	1	4	A.4	0
125	2	1	4	A.5	0
126	2	1	4	A.6	0
127	2	1	4	A.7	0
128	2	1	4	A.8	0
129	2	1	4	A.9	1
130	2	1	4	A.10	0
131	2	1	4	A.11	0
132	2	1	4	A.12	1
133	2	1	4	A.13	1
134	2	1	4	A.14	1
135	2	1	4	A.15	0
136	2	1	4	A.16	0
137	2	1	4	A.17	0
138	2	1	4	A.18	0
139	2	1	4	A.19	0
140	2	1	4	A.20	0
141	2	1	4	A.21	0
142	2	1	4	A.22	0
143	2	1	4	A.23	0
144	2	1	4	A.24	0
145	2	1	4	A.25	0
146	2	1	4	A.26	0
147	2	1	4	A.27	0
148	2	1	4	A.28	0
149	2	1	4	A.29	0
150	2	1	4	A.30	0
151	2	1	4	A.31	0
152	2	1	4	A.32	0
153	2	1	4	A.33	0
154	2	1	4	A.34	0
155	2	1	4	A.35	0
156	2	1	4	A.36	0
157	2	1	4	A.37	0
158	2	1	4	A.38	0
159	2	1	4	A.39	0
160	2	1	4	A.40	0
161	2	2	1	B.1	1
162	2	2	1	B.2	0
163	2	2	1	B.3	0
164	2	2	1	B.4	0
165	2	2	1	B.5	0
166	2	2	1	B.6	0
167	2	2	1	B.7	0
168	2	2	1	B.8	0
169	2	2	1	B.9	0
170	2	2	1	B.10	0
171	2	2	1	B.11	0
172	2	2	1	B.12	0
173	2	2	1	B.13	0
174	2	2	1	B.14	0
175	2	2	1	B.15	0
176	2	2	1	B.16	0
177	2	2	1	B.17	0
178	2	2	1	B.18	0
179	2	2	1	B.19	0
180	2	2	1	B.20	0
181	2	2	1	B.21	0
182	2	2	1	B.22	0
183	2	2	1	B.23	0
184	2	2	1	B.24	0
185	2	2	1	B.25	0
186	2	2	1	B.26	0
187	2	2	1	B.27	0
188	2	2	1	B.28	0
189	2	2	1	B.29	0
190	2	2	1	B.30	0
191	2	2	1	B.31	0
192	2	2	1	B.32	0
193	2	2	1	B.33	0
194	2	2	1	B.34	0
195	2	2	1	B.35	0
196	2	2	1	B.36	0
197	2	2	1	B.37	0
198	2	2	1	B.38	0
199	2	2	1	B.39	0
200	2	2	1	B.40	0
201	2	2	2	B.1	1
202	2	2	2	B.2	1
203	2	2	2	B.3	0
204	2	2	2	B.4	0
205	2	2	2	B.5	0
206	2	2	2	B.6	0
207	2	2	2	B.7	0
208	2	2	2	B.8	0
209	2	2	2	B.9	0
210	2	2	2	B.10	0
211	2	2	2	B.11	0
212	2	2	2	B.12	0
213	2	2	2	B.13	0
214	2	2	2	B.14	0
215	2	2	2	B.15	0
216	2	2	2	B.16	0
217	2	2	2	B.17	0
218	2	2	2	B.18	0
219	2	2	2	B.19	0
220	2	2	2	B.20	0
221	2	2	2	B.21	0
222	2	2	2	B.22	0
223	2	2	2	B.23	0
224	2	2	2	B.24	0
225	2	2	2	B.25	0
226	2	2	2	B.26	0
227	2	2	2	B.27	0
228	2	2	2	B.28	0
229	2	2	2	B.29	0
230	2	2	2	B.30	0
231	2	2	2	B.31	0
232	2	2	2	B.32	0
233	2	2	2	B.33	0
234	2	2	2	B.34	0
235	2	2	2	B.35	0
236	2	2	2	B.36	0
237	2	2	2	B.37	0
238	2	2	2	B.38	0
239	2	2	2	B.39	0
240	2	2	2	B.40	0
241	2	2	3	B.1	0
242	2	2	3	B.2	0
243	2	2	3	B.3	1
244	2	2	3	B.4	1
245	2	2	3	B.5	0
246	2	2	3	B.6	0
247	2	2	3	B.7	0
248	2	2	3	B.8	0
249	2	2	3	B.9	0
250	2	2	3	B.10	0
251	2	2	3	B.11	0
252	2	2	3	B.12	0
253	2	2	3	B.13	0
254	2	2	3	B.14	0
255	2	2	3	B.15	0
256	2	2	3	B.16	0
257	2	2	3	B.17	0
258	2	2	3	B.18	0
259	2	2	3	B.19	0
260	2	2	3	B.20	0
261	2	2	3	B.21	0
262	2	2	3	B.22	0
263	2	2	3	B.23	0
264	2	2	3	B.24	0
265	2	2	3	B.25	0
266	2	2	3	B.26	0
267	2	2	3	B.27	0
268	2	2	3	B.28	0
269	2	2	3	B.29	0
270	2	2	3	B.30	0
271	2	2	3	B.31	0
272	2	2	3	B.32	0
273	2	2	3	B.33	0
274	2	2	3	B.34	0
275	2	2	3	B.35	0
276	2	2	3	B.36	0
277	2	2	3	B.37	0
278	2	2	3	B.38	0
279	2	2	3	B.39	0
280	2	2	3	B.40	0
281	2	2	4	B.1	1
282	2	2	4	B.2	0
283	2	2	4	B.3	0
284	2	2	4	B.4	0
285	2	2	4	B.5	1
286	2	2	4	B.6	1
287	2	2	4	B.7	0
288	2	2	4	B.8	0
289	2	2	4	B.9	0
290	2	2	4	B.10	0
291	2	2	4	B.11	0
292	2	2	4	B.12	0
293	2	2	4	B.13	0
294	2	2	4	B.14	0
295	2	2	4	B.15	0
296	2	2	4	B.16	0
297	2	2	4	B.17	0
298	2	2	4	B.18	0
299	2	2	4	B.19	0
300	2	2	4	B.20	0
301	2	2	4	B.21	0
302	2	2	4	B.22	0
303	2	2	4	B.23	0
304	2	2	4	B.24	0
305	2	2	4	B.25	0
306	2	2	4	B.26	0
307	2	2	4	B.27	0
308	2	2	4	B.28	0
309	2	2	4	B.29	0
310	2	2	4	B.30	0
311	2	2	4	B.31	0
312	2	2	4	B.32	0
313	2	2	4	B.33	0
314	2	2	4	B.34	0
315	2	2	4	B.35	0
316	2	2	4	B.36	0
317	2	2	4	B.37	0
318	2	2	4	B.38	0
319	2	2	4	B.39	0
320	2	2	4	B.40	0
321	19	1	1	C.1	1
322	19	1	1	C.2	1
323	19	1	1	C.3	1
324	19	1	1	C.4	1
325	19	1	1	C.5	1
326	19	1	1	C.6	0
327	19	1	1	C.7	0
328	19	1	1	C.8	0
329	19	1	1	C.9	0
330	19	1	1	C.10	0
331	19	1	1	C.11	0
332	19	1	1	C.12	0
333	19	1	1	C.13	0
334	19	1	1	C.14	0
335	19	1	1	C.15	0
336	19	1	1	C.16	0
337	19	1	1	C.17	0
338	19	1	1	C.18	0
339	19	1	1	C.19	0
340	19	1	1	C.20	0
341	19	1	1	C.21	0
342	19	1	1	C.22	0
343	19	1	1	C.23	0
344	19	1	1	C.24	0
345	19	1	1	C.25	0
346	19	1	1	C.26	0
347	19	1	1	C.27	0
348	19	1	1	C.28	0
349	19	1	1	C.29	0
350	19	1	1	C.30	0
351	19	1	1	C.31	0
352	19	1	1	C.32	0
353	19	1	1	C.33	0
354	19	1	1	C.34	0
355	19	1	1	C.35	0
356	19	1	1	C.36	0
357	19	1	1	C.37	0
358	19	1	1	C.38	0
359	19	1	1	C.39	0
360	19	1	1	C.40	0
361	19	1	2	C.1	0
362	19	1	2	C.2	0
363	19	1	2	C.3	0
364	19	1	2	C.4	0
365	19	1	2	C.5	0
366	19	1	2	C.6	1
367	19	1	2	C.7	1
368	19	1	2	C.8	1
369	19	1	2	C.9	1
370	19	1	2	C.10	0
371	19	1	2	C.11	0
372	19	1	2	C.12	0
373	19	1	2	C.13	0
374	19	1	2	C.14	0
375	19	1	2	C.15	0
376	19	1	2	C.16	0
377	19	1	2	C.17	0
378	19	1	2	C.18	0
379	19	1	2	C.19	0
380	19	1	2	C.20	0
381	19	1	2	C.21	0
382	19	1	2	C.22	0
383	19	1	2	C.23	0
384	19	1	2	C.24	0
385	19	1	2	C.25	0
386	19	1	2	C.26	0
387	19	1	2	C.27	0
388	19	1	2	C.28	0
389	19	1	2	C.29	0
390	19	1	2	C.30	0
391	19	1	2	C.31	0
392	19	1	2	C.32	0
393	19	1	2	C.33	0
394	19	1	2	C.34	0
395	19	1	2	C.35	0
396	19	1	2	C.36	0
397	19	1	2	C.37	0
398	19	1	2	C.38	0
399	19	1	2	C.39	0
400	19	1	2	C.40	0
401	19	1	3	C.1	0
402	19	1	3	C.2	0
403	19	1	3	C.3	0
404	19	1	3	C.4	0
405	19	1	3	C.5	0
406	19	1	3	C.6	0
407	19	1	3	C.7	0
408	19	1	3	C.8	1
409	19	1	3	C.9	0
410	19	1	3	C.10	1
411	19	1	3	C.11	1
412	19	1	3	C.12	0
413	19	1	3	C.13	0
414	19	1	3	C.14	0
415	19	1	3	C.15	0
416	19	1	3	C.16	0
417	19	1	3	C.17	0
418	19	1	3	C.18	0
419	19	1	3	C.19	0
420	19	1	3	C.20	0
421	19	1	3	C.21	0
422	19	1	3	C.22	0
423	19	1	3	C.23	0
424	19	1	3	C.24	0
425	19	1	3	C.25	0
426	19	1	3	C.26	0
427	19	1	3	C.27	0
428	19	1	3	C.28	0
429	19	1	3	C.29	0
430	19	1	3	C.30	0
431	19	1	3	C.31	0
432	19	1	3	C.32	0
433	19	1	3	C.33	0
434	19	1	3	C.34	0
435	19	1	3	C.35	0
436	19	1	3	C.36	0
437	19	1	3	C.37	0
438	19	1	3	C.38	0
439	19	1	3	C.39	0
440	19	1	3	C.40	0
441	19	1	4	C.1	0
442	19	1	4	C.2	0
443	19	1	4	C.3	1
444	19	1	4	C.4	0
445	19	1	4	C.5	0
446	19	1	4	C.6	0
447	19	1	4	C.7	0
448	19	1	4	C.8	0
449	19	1	4	C.9	0
450	19	1	4	C.10	0
451	19	1	4	C.11	0
452	19	1	4	C.12	0
453	19	1	4	C.13	0
454	19	1	4	C.14	0
455	19	1	4	C.15	0
456	19	1	4	C.16	0
457	19	1	4	C.17	0
458	19	1	4	C.18	0
459	19	1	4	C.19	0
460	19	1	4	C.20	0
461	19	1	4	C.21	0
462	19	1	4	C.22	0
463	19	1	4	C.23	0
464	19	1	4	C.24	0
465	19	1	4	C.25	0
466	19	1	4	C.26	0
467	19	1	4	C.27	0
468	19	1	4	C.28	0
469	19	1	4	C.29	0
470	19	1	4	C.30	0
471	19	1	4	C.31	0
472	19	1	4	C.32	0
473	19	1	4	C.33	0
474	19	1	4	C.34	0
475	19	1	4	C.35	0
476	19	1	4	C.36	0
477	19	1	4	C.37	0
478	19	1	4	C.38	0
479	19	1	4	C.39	0
480	19	1	4	C.40	0
481	19	2	1	D.1	1
482	19	2	1	D.2	1
483	19	2	1	D.3	1
484	19	2	1	D.4	1
485	19	2	1	D.5	0
486	19	2	1	D.6	0
487	19	2	1	D.7	0
488	19	2	1	D.8	0
489	19	2	1	D.9	0
490	19	2	1	D.10	0
491	19	2	1	D.11	0
492	19	2	1	D.12	0
493	19	2	1	D.13	0
494	19	2	1	D.14	0
495	19	2	1	D.15	0
496	19	2	1	D.16	0
497	19	2	1	D.17	0
498	19	2	1	D.18	0
499	19	2	1	D.19	0
500	19	2	1	D.20	0
501	19	2	1	D.21	0
502	19	2	1	D.22	0
503	19	2	1	D.23	0
504	19	2	1	D.24	0
505	19	2	1	D.25	0
506	19	2	1	D.26	0
507	19	2	1	D.27	0
508	19	2	1	D.28	0
509	19	2	1	D.29	0
510	19	2	1	D.30	0
511	19	2	1	D.31	0
512	19	2	1	D.32	0
513	19	2	1	D.33	0
514	19	2	1	D.34	0
515	19	2	1	D.35	0
516	19	2	1	D.36	0
517	19	2	1	D.37	0
518	19	2	1	D.38	0
519	19	2	1	D.39	0
520	19	2	1	D.40	0
521	19	2	2	D.1	0
522	19	2	2	D.2	0
523	19	2	2	D.3	0
524	19	2	2	D.4	1
525	19	2	2	D.5	1
526	19	2	2	D.6	0
527	19	2	2	D.7	0
528	19	2	2	D.8	0
529	19	2	2	D.9	0
530	19	2	2	D.10	0
531	19	2	2	D.11	0
532	19	2	2	D.12	0
533	19	2	2	D.13	0
534	19	2	2	D.14	0
535	19	2	2	D.15	0
536	19	2	2	D.16	0
537	19	2	2	D.17	0
538	19	2	2	D.18	0
539	19	2	2	D.19	0
540	19	2	2	D.20	0
541	19	2	2	D.21	0
542	19	2	2	D.22	0
543	19	2	2	D.23	0
544	19	2	2	D.24	0
545	19	2	2	D.25	0
546	19	2	2	D.26	0
547	19	2	2	D.27	0
548	19	2	2	D.28	0
549	19	2	2	D.29	0
550	19	2	2	D.30	0
551	19	2	2	D.31	0
552	19	2	2	D.32	0
553	19	2	2	D.33	0
554	19	2	2	D.34	0
555	19	2	2	D.35	0
556	19	2	2	D.36	0
557	19	2	2	D.37	0
558	19	2	2	D.38	0
559	19	2	2	D.39	0
560	19	2	2	D.40	0
561	19	2	3	D.1	0
562	19	2	3	D.2	0
563	19	2	3	D.3	1
564	19	2	3	D.4	0
565	19	2	3	D.5	0
566	19	2	3	D.6	1
567	19	2	3	D.7	1
568	19	2	3	D.8	1
569	19	2	3	D.9	0
570	19	2	3	D.10	0
571	19	2	3	D.11	0
572	19	2	3	D.12	0
573	19	2	3	D.13	0
574	19	2	3	D.14	0
575	19	2	3	D.15	0
576	19	2	3	D.16	0
577	19	2	3	D.17	0
578	19	2	3	D.18	0
579	19	2	3	D.19	0
580	19	2	3	D.20	0
581	19	2	3	D.21	0
582	19	2	3	D.22	0
583	19	2	3	D.23	0
584	19	2	3	D.24	0
585	19	2	3	D.25	0
586	19	2	3	D.26	0
587	19	2	3	D.27	0
588	19	2	3	D.28	0
589	19	2	3	D.29	0
590	19	2	3	D.30	0
591	19	2	3	D.31	0
592	19	2	3	D.32	0
593	19	2	3	D.33	0
594	19	2	3	D.34	0
595	19	2	3	D.35	0
596	19	2	3	D.36	0
597	19	2	3	D.37	0
598	19	2	3	D.38	0
599	19	2	3	D.39	0
600	19	2	3	D.40	0
601	19	2	4	D.1	0
602	19	2	4	D.2	0
603	19	2	4	D.3	0
604	19	2	4	D.4	0
605	19	2	4	D.5	0
606	19	2	4	D.6	1
607	19	2	4	D.7	0
608	19	2	4	D.8	1
609	19	2	4	D.9	1
610	19	2	4	D.10	1
611	19	2	4	D.11	0
612	19	2	4	D.12	0
613	19	2	4	D.13	0
614	19	2	4	D.14	0
615	19	2	4	D.15	0
616	19	2	4	D.16	0
617	19	2	4	D.17	0
618	19	2	4	D.18	0
619	19	2	4	D.19	0
620	19	2	4	D.20	0
621	19	2	4	D.21	0
622	19	2	4	D.22	0
623	19	2	4	D.23	0
624	19	2	4	D.24	0
625	19	2	4	D.25	0
626	19	2	4	D.26	0
627	19	2	4	D.27	0
628	19	2	4	D.28	0
629	19	2	4	D.29	0
630	19	2	4	D.30	0
631	19	2	4	D.31	0
632	19	2	4	D.32	0
633	19	2	4	D.33	0
634	19	2	4	D.34	0
635	19	2	4	D.35	0
636	19	2	4	D.36	0
637	19	2	4	D.37	0
638	19	2	4	D.38	0
639	19	2	4	D.39	0
640	19	2	4	D.40	0
641	17	1	1	E.1	1
642	17	1	1	E.2	1
643	17	1	1	E.3	1
644	17	1	1	E.4	1
645	17	1	1	E.5	1
646	17	1	1	E.6	0
647	17	1	1	E.7	0
648	17	1	1	E.8	0
649	17	1	1	E.9	0
650	17	1	1	E.10	0
651	17	1	1	E.11	0
652	17	1	1	E.12	0
653	17	1	1	E.13	0
654	17	1	1	E.14	0
655	17	1	1	E.15	0
656	17	1	1	E.16	0
657	17	1	1	E.17	0
658	17	1	1	E.18	0
659	17	1	1	E.19	0
660	17	1	1	E.20	0
661	17	1	1	E.21	0
662	17	1	1	E.22	0
663	17	1	1	E.23	0
664	17	1	1	E.24	0
665	17	1	1	E.25	0
666	17	1	1	E.26	0
667	17	1	1	E.27	0
668	17	1	1	E.28	0
669	17	1	1	E.29	0
670	17	1	1	E.30	0
671	17	1	1	E.31	0
672	17	1	1	E.32	0
673	17	1	1	E.33	0
674	17	1	1	E.34	0
675	17	1	1	E.35	0
676	17	1	1	E.36	0
677	17	1	1	E.37	0
678	17	1	1	E.38	0
679	17	1	1	E.39	0
680	17	1	1	E.40	0
681	17	1	2	E.1	1
682	17	1	2	E.2	1
683	17	1	2	E.3	0
684	17	1	2	E.4	0
685	17	1	2	E.5	0
686	17	1	2	E.6	0
687	17	1	2	E.7	0
688	17	1	2	E.8	0
689	17	1	2	E.9	0
690	17	1	2	E.10	0
691	17	1	2	E.11	0
692	17	1	2	E.12	0
693	17	1	2	E.13	0
694	17	1	2	E.14	0
695	17	1	2	E.15	0
696	17	1	2	E.16	0
697	17	1	2	E.17	0
698	17	1	2	E.18	0
699	17	1	2	E.19	0
700	17	1	2	E.20	0
701	17	1	2	E.21	0
702	17	1	2	E.22	0
703	17	1	2	E.23	0
704	17	1	2	E.24	0
705	17	1	2	E.25	0
706	17	1	2	E.26	0
707	17	1	2	E.27	0
708	17	1	2	E.28	0
709	17	1	2	E.29	0
710	17	1	2	E.30	0
711	17	1	2	E.31	0
712	17	1	2	E.32	0
713	17	1	2	E.33	0
714	17	1	2	E.34	0
715	17	1	2	E.35	0
716	17	1	2	E.36	0
717	17	1	2	E.37	0
718	17	1	2	E.38	0
719	17	1	2	E.39	0
720	17	1	2	E.40	0
721	17	1	3	E.1	0
722	17	1	3	E.2	0
723	17	1	3	E.3	0
724	17	1	3	E.4	1
725	17	1	3	E.5	0
726	17	1	3	E.6	0
727	17	1	3	E.7	0
728	17	1	3	E.8	0
729	17	1	3	E.9	0
730	17	1	3	E.10	0
731	17	1	3	E.11	0
732	17	1	3	E.12	0
733	17	1	3	E.13	0
734	17	1	3	E.14	0
735	17	1	3	E.15	0
736	17	1	3	E.16	0
737	17	1	3	E.17	0
738	17	1	3	E.18	0
739	17	1	3	E.19	0
740	17	1	3	E.20	0
741	17	1	3	E.21	0
742	17	1	3	E.22	0
743	17	1	3	E.23	0
744	17	1	3	E.24	0
745	17	1	3	E.25	0
746	17	1	3	E.26	0
747	17	1	3	E.27	0
748	17	1	3	E.28	0
749	17	1	3	E.29	0
750	17	1	3	E.30	0
751	17	1	3	E.31	0
752	17	1	3	E.32	0
753	17	1	3	E.33	0
754	17	1	3	E.34	0
755	17	1	3	E.35	0
756	17	1	3	E.36	0
757	17	1	3	E.37	0
758	17	1	3	E.38	0
759	17	1	3	E.39	0
760	17	1	3	E.40	0
761	17	1	4	E.1	0
762	17	1	4	E.2	0
763	17	1	4	E.3	1
764	17	1	4	E.4	0
765	17	1	4	E.5	1
766	17	1	4	E.6	1
767	17	1	4	E.7	0
768	17	1	4	E.8	0
769	17	1	4	E.9	0
770	17	1	4	E.10	0
771	17	1	4	E.11	0
772	17	1	4	E.12	0
773	17	1	4	E.13	0
774	17	1	4	E.14	0
775	17	1	4	E.15	0
776	17	1	4	E.16	0
777	17	1	4	E.17	0
778	17	1	4	E.18	0
779	17	1	4	E.19	0
780	17	1	4	E.20	0
781	17	1	4	E.21	0
782	17	1	4	E.22	0
783	17	1	4	E.23	0
784	17	1	4	E.24	0
785	17	1	4	E.25	0
786	17	1	4	E.26	0
787	17	1	4	E.27	0
788	17	1	4	E.28	0
789	17	1	4	E.29	0
790	17	1	4	E.30	0
791	17	1	4	E.31	0
792	17	1	4	E.32	0
793	17	1	4	E.33	0
794	17	1	4	E.34	0
795	17	1	4	E.35	0
796	17	1	4	E.36	0
797	17	1	4	E.37	0
798	17	1	4	E.38	0
799	17	1	4	E.39	0
800	17	1	4	E.40	0
801	17	2	1	F.1	1
802	17	2	1	F.2	1
803	17	2	1	F.3	1
804	17	2	1	F.4	1
805	17	2	1	F.5	1
806	17	2	1	F.6	1
807	17	2	1	F.7	0
808	17	2	1	F.8	0
809	17	2	1	F.9	0
810	17	2	1	F.10	0
811	17	2	1	F.11	0
812	17	2	1	F.12	0
813	17	2	1	F.13	0
814	17	2	1	F.14	0
815	17	2	1	F.15	0
816	17	2	1	F.16	0
817	17	2	1	F.17	0
818	17	2	1	F.18	0
819	17	2	1	F.19	0
820	17	2	1	F.20	0
821	17	2	1	F.21	0
822	17	2	1	F.22	0
823	17	2	1	F.23	0
824	17	2	1	F.24	0
825	17	2	1	F.25	0
826	17	2	1	F.26	0
827	17	2	1	F.27	0
828	17	2	1	F.28	0
829	17	2	1	F.29	0
830	17	2	1	F.30	0
831	17	2	1	F.31	0
832	17	2	1	F.32	0
833	17	2	1	F.33	0
834	17	2	1	F.34	0
835	17	2	1	F.35	0
836	17	2	1	F.36	0
837	17	2	1	F.37	0
838	17	2	1	F.38	0
839	17	2	1	F.39	0
840	17	2	1	F.40	0
841	17	2	2	F.1	0
842	17	2	2	F.2	0
843	17	2	2	F.3	1
844	17	2	2	F.4	0
845	17	2	2	F.5	0
846	17	2	2	F.6	0
847	17	2	2	F.7	1
848	17	2	2	F.8	1
849	17	2	2	F.9	0
850	17	2	2	F.10	0
851	17	2	2	F.11	0
852	17	2	2	F.12	0
853	17	2	2	F.13	0
854	17	2	2	F.14	0
855	17	2	2	F.15	0
856	17	2	2	F.16	0
857	17	2	2	F.17	0
858	17	2	2	F.18	0
859	17	2	2	F.19	0
860	17	2	2	F.20	0
861	17	2	2	F.21	0
862	17	2	2	F.22	0
863	17	2	2	F.23	0
864	17	2	2	F.24	0
865	17	2	2	F.25	0
866	17	2	2	F.26	0
867	17	2	2	F.27	0
868	17	2	2	F.28	0
869	17	2	2	F.29	0
870	17	2	2	F.30	0
871	17	2	2	F.31	0
872	17	2	2	F.32	0
873	17	2	2	F.33	0
874	17	2	2	F.34	0
875	17	2	2	F.35	0
876	17	2	2	F.36	0
877	17	2	2	F.37	0
878	17	2	2	F.38	0
879	17	2	2	F.39	0
880	17	2	2	F.40	0
881	17	2	3	F.1	0
882	17	2	3	F.2	0
883	17	2	3	F.3	0
884	17	2	3	F.4	0
885	17	2	3	F.5	0
886	17	2	3	F.6	0
887	17	2	3	F.7	0
888	17	2	3	F.8	1
889	17	2	3	F.9	1
890	17	2	3	F.10	1
891	17	2	3	F.11	1
892	17	2	3	F.12	0
893	17	2	3	F.13	0
894	17	2	3	F.14	0
895	17	2	3	F.15	0
896	17	2	3	F.16	0
897	17	2	3	F.17	0
898	17	2	3	F.18	0
899	17	2	3	F.19	0
900	17	2	3	F.20	0
901	17	2	3	F.21	0
902	17	2	3	F.22	0
903	17	2	3	F.23	0
904	17	2	3	F.24	0
905	17	2	3	F.25	0
906	17	2	3	F.26	0
907	17	2	3	F.27	0
908	17	2	3	F.28	0
909	17	2	3	F.29	0
910	17	2	3	F.30	0
911	17	2	3	F.31	0
912	17	2	3	F.32	0
913	17	2	3	F.33	0
914	17	2	3	F.34	0
915	17	2	3	F.35	0
916	17	2	3	F.36	0
917	17	2	3	F.37	0
918	17	2	3	F.38	0
919	17	2	3	F.39	0
920	17	2	3	F.40	0
921	17	2	4	F.1	0
922	17	2	4	F.2	0
923	17	2	4	F.3	0
924	17	2	4	F.4	1
925	17	2	4	F.5	0
926	17	2	4	F.6	0
927	17	2	4	F.7	0
928	17	2	4	F.8	1
929	17	2	4	F.9	0
930	17	2	4	F.10	0
931	17	2	4	F.11	0
932	17	2	4	F.12	1
933	17	2	4	F.13	1
934	17	2	4	F.14	0
935	17	2	4	F.15	0
936	17	2	4	F.16	0
937	17	2	4	F.17	0
938	17	2	4	F.18	0
939	17	2	4	F.19	0
940	17	2	4	F.20	0
941	17	2	4	F.21	0
942	17	2	4	F.22	0
943	17	2	4	F.23	0
944	17	2	4	F.24	0
945	17	2	4	F.25	0
946	17	2	4	F.26	0
947	17	2	4	F.27	0
948	17	2	4	F.28	0
949	17	2	4	F.29	0
950	17	2	4	F.30	0
951	17	2	4	F.31	0
952	17	2	4	F.32	0
953	17	2	4	F.33	0
954	17	2	4	F.34	0
955	17	2	4	F.35	0
956	17	2	4	F.36	0
957	17	2	4	F.37	0
958	17	2	4	F.38	0
959	17	2	4	F.39	0
960	17	2	4	F.40	0
961	14	1	1	G.1	1
962	14	1	1	G.2	1
963	14	1	1	G.3	1
964	14	1	1	G.4	0
965	14	1	1	G.5	0
966	14	1	1	G.6	0
967	14	1	1	G.7	0
968	14	1	1	G.8	0
969	14	1	1	G.9	0
970	14	1	1	G.10	0
971	14	1	1	G.11	0
972	14	1	1	G.12	0
973	14	1	1	G.13	0
974	14	1	1	G.14	0
975	14	1	1	G.15	0
976	14	1	1	G.16	0
977	14	1	1	G.17	0
978	14	1	1	G.18	0
979	14	1	1	G.19	0
980	14	1	1	G.20	0
981	14	1	1	G.21	0
982	14	1	1	G.22	0
983	14	1	1	G.23	0
984	14	1	1	G.24	0
985	14	1	1	G.25	0
986	14	1	1	G.26	0
987	14	1	1	G.27	0
988	14	1	1	G.28	0
989	14	1	1	G.29	0
990	14	1	1	G.30	0
991	14	1	1	G.31	0
992	14	1	1	G.32	0
993	14	1	1	G.33	0
994	14	1	1	G.34	0
995	14	1	1	G.35	0
996	14	1	1	G.36	0
997	14	1	1	G.37	0
998	14	1	1	G.38	0
999	14	1	1	G.39	0
1000	14	1	1	G.40	0
1001	14	1	2	G.1	0
1002	14	1	2	G.2	0
1003	14	1	2	G.3	0
1004	14	1	2	G.4	1
1005	14	1	2	G.5	1
1006	14	1	2	G.6	0
1007	14	1	2	G.7	0
1008	14	1	2	G.8	0
1009	14	1	2	G.9	0
1010	14	1	2	G.10	0
1011	14	1	2	G.11	0
1012	14	1	2	G.12	0
1013	14	1	2	G.13	0
1014	14	1	2	G.14	0
1015	14	1	2	G.15	0
1016	14	1	2	G.16	0
1017	14	1	2	G.17	0
1018	14	1	2	G.18	0
1019	14	1	2	G.19	0
1020	14	1	2	G.20	0
1021	14	1	2	G.21	0
1022	14	1	2	G.22	0
1023	14	1	2	G.23	0
1024	14	1	2	G.24	0
1025	14	1	2	G.25	0
1026	14	1	2	G.26	0
1027	14	1	2	G.27	0
1028	14	1	2	G.28	0
1029	14	1	2	G.29	0
1030	14	1	2	G.30	0
1031	14	1	2	G.31	0
1032	14	1	2	G.32	0
1033	14	1	2	G.33	0
1034	14	1	2	G.34	0
1035	14	1	2	G.35	0
1036	14	1	2	G.36	0
1037	14	1	2	G.37	0
1038	14	1	2	G.38	0
1039	14	1	2	G.39	0
1040	14	1	2	G.40	0
1041	14	1	3	G.1	1
1042	14	1	3	G.2	0
1043	14	1	3	G.3	0
1044	14	1	3	G.4	0
1045	14	1	3	G.5	1
1046	14	1	3	G.6	1
1047	14	1	3	G.7	0
1048	14	1	3	G.8	0
1049	14	1	3	G.9	0
1050	14	1	3	G.10	0
1051	14	1	3	G.11	0
1052	14	1	3	G.12	0
1053	14	1	3	G.13	0
1054	14	1	3	G.14	0
1055	14	1	3	G.15	0
1056	14	1	3	G.16	0
1057	14	1	3	G.17	0
1058	14	1	3	G.18	0
1059	14	1	3	G.19	0
1060	14	1	3	G.20	0
1061	14	1	3	G.21	0
1062	14	1	3	G.22	0
1063	14	1	3	G.23	0
1064	14	1	3	G.24	0
1065	14	1	3	G.25	0
1066	14	1	3	G.26	0
1067	14	1	3	G.27	0
1068	14	1	3	G.28	0
1069	14	1	3	G.29	0
1070	14	1	3	G.30	0
1071	14	1	3	G.31	0
1072	14	1	3	G.32	0
1073	14	1	3	G.33	0
1074	14	1	3	G.34	0
1075	14	1	3	G.35	0
1076	14	1	3	G.36	0
1077	14	1	3	G.37	0
1078	14	1	3	G.38	0
1079	14	1	3	G.39	0
1080	14	1	3	G.40	0
1081	14	1	4	G.1	1
1082	14	1	4	G.2	0
1083	14	1	4	G.3	0
1084	14	1	4	G.4	0
1085	14	1	4	G.5	1
1086	14	1	4	G.6	0
1087	14	1	4	G.7	1
1088	14	1	4	G.8	1
1089	14	1	4	G.9	0
1090	14	1	4	G.10	0
1091	14	1	4	G.11	0
1092	14	1	4	G.12	0
1093	14	1	4	G.13	0
1094	14	1	4	G.14	0
1095	14	1	4	G.15	0
1096	14	1	4	G.16	0
1097	14	1	4	G.17	0
1098	14	1	4	G.18	0
1099	14	1	4	G.19	0
1100	14	1	4	G.20	0
1101	14	1	4	G.21	0
1102	14	1	4	G.22	0
1103	14	1	4	G.23	0
1104	14	1	4	G.24	0
1105	14	1	4	G.25	0
1106	14	1	4	G.26	0
1107	14	1	4	G.27	0
1108	14	1	4	G.28	0
1109	14	1	4	G.29	0
1110	14	1	4	G.30	0
1111	14	1	4	G.31	0
1112	14	1	4	G.32	0
1113	14	1	4	G.33	0
1114	14	1	4	G.34	0
1115	14	1	4	G.35	0
1116	14	1	4	G.36	0
1117	14	1	4	G.37	0
1118	14	1	4	G.38	0
1119	14	1	4	G.39	0
1120	14	1	4	G.40	0
1121	14	2	1	H.1	1
1122	14	2	1	H.2	1
1123	14	2	1	H.3	1
1124	14	2	1	H.4	1
1125	14	2	1	H.5	0
1126	14	2	1	H.6	0
1127	14	2	1	H.7	0
1128	14	2	1	H.8	0
1129	14	2	1	H.9	0
1130	14	2	1	H.10	0
1131	14	2	1	H.11	0
1132	14	2	1	H.12	0
1133	14	2	1	H.13	0
1134	14	2	1	H.14	0
1135	14	2	1	H.15	0
1136	14	2	1	H.16	0
1137	14	2	1	H.17	0
1138	14	2	1	H.18	0
1139	14	2	1	H.19	0
1140	14	2	1	H.20	0
1141	14	2	1	H.21	0
1142	14	2	1	H.22	0
1143	14	2	1	H.23	0
1144	14	2	1	H.24	0
1145	14	2	1	H.25	0
1146	14	2	1	H.26	0
1147	14	2	1	H.27	0
1148	14	2	1	H.28	0
1149	14	2	1	H.29	0
1150	14	2	1	H.30	0
1151	14	2	1	H.31	0
1152	14	2	1	H.32	0
1153	14	2	1	H.33	0
1154	14	2	1	H.34	0
1155	14	2	1	H.35	0
1156	14	2	1	H.36	0
1157	14	2	1	H.37	0
1158	14	2	1	H.38	0
1159	14	2	1	H.39	0
1160	14	2	1	H.40	0
1161	14	2	2	H.1	0
1162	14	2	2	H.2	0
1163	14	2	2	H.3	1
1164	14	2	2	H.4	0
1165	14	2	2	H.5	1
1166	14	2	2	H.6	1
1167	14	2	2	H.7	1
1168	14	2	2	H.8	1
1169	14	2	2	H.9	0
1170	14	2	2	H.10	0
1171	14	2	2	H.11	0
1172	14	2	2	H.12	0
1173	14	2	2	H.13	0
1174	14	2	2	H.14	0
1175	14	2	2	H.15	0
1176	14	2	2	H.16	0
1177	14	2	2	H.17	0
1178	14	2	2	H.18	0
1179	14	2	2	H.19	0
1180	14	2	2	H.20	0
1181	14	2	2	H.21	0
1182	14	2	2	H.22	0
1183	14	2	2	H.23	0
1184	14	2	2	H.24	0
1185	14	2	2	H.25	0
1186	14	2	2	H.26	0
1187	14	2	2	H.27	0
1188	14	2	2	H.28	0
1189	14	2	2	H.29	0
1190	14	2	2	H.30	0
1191	14	2	2	H.31	0
1192	14	2	2	H.32	0
1193	14	2	2	H.33	0
1194	14	2	2	H.34	0
1195	14	2	2	H.35	0
1196	14	2	2	H.36	0
1197	14	2	2	H.37	0
1198	14	2	2	H.38	0
1199	14	2	2	H.39	0
1200	14	2	2	H.40	0
1201	14	2	3	H.1	0
1202	14	2	3	H.2	0
1203	14	2	3	H.3	0
1204	14	2	3	H.4	0
1205	14	2	3	H.5	0
1206	14	2	3	H.6	1
1207	14	2	3	H.7	0
1208	14	2	3	H.8	0
1209	14	2	3	H.9	1
1210	14	2	3	H.10	0
1211	14	2	3	H.11	0
1212	14	2	3	H.12	0
1213	14	2	3	H.13	0
1214	14	2	3	H.14	0
1215	14	2	3	H.15	0
1216	14	2	3	H.16	0
1217	14	2	3	H.17	0
1218	14	2	3	H.18	0
1219	14	2	3	H.19	0
1220	14	2	3	H.20	0
1221	14	2	3	H.21	0
1222	14	2	3	H.22	0
1223	14	2	3	H.23	0
1224	14	2	3	H.24	0
1225	14	2	3	H.25	0
1226	14	2	3	H.26	0
1227	14	2	3	H.27	0
1228	14	2	3	H.28	0
1229	14	2	3	H.29	0
1230	14	2	3	H.30	0
1231	14	2	3	H.31	0
1232	14	2	3	H.32	0
1233	14	2	3	H.33	0
1234	14	2	3	H.34	0
1235	14	2	3	H.35	0
1236	14	2	3	H.36	0
1237	14	2	3	H.37	0
1238	14	2	3	H.38	0
1239	14	2	3	H.39	0
1240	14	2	3	H.40	0
1241	14	2	4	H.1	0
1242	14	2	4	H.2	1
1243	14	2	4	H.3	0
1244	14	2	4	H.4	0
1245	14	2	4	H.5	0
1246	14	2	4	H.6	0
1247	14	2	4	H.7	1
1248	14	2	4	H.8	0
1249	14	2	4	H.9	0
1250	14	2	4	H.10	1
1251	14	2	4	H.11	0
1252	14	2	4	H.12	0
1253	14	2	4	H.13	0
1254	14	2	4	H.14	0
1255	14	2	4	H.15	0
1256	14	2	4	H.16	0
1257	14	2	4	H.17	0
1258	14	2	4	H.18	0
1259	14	2	4	H.19	0
1260	14	2	4	H.20	0
1261	14	2	4	H.21	0
1262	14	2	4	H.22	0
1263	14	2	4	H.23	0
1264	14	2	4	H.24	0
1265	14	2	4	H.25	0
1266	14	2	4	H.26	0
1267	14	2	4	H.27	0
1268	14	2	4	H.28	0
1269	14	2	4	H.29	0
1270	14	2	4	H.30	0
1271	14	2	4	H.31	0
1272	14	2	4	H.32	0
1273	14	2	4	H.33	0
1274	14	2	4	H.34	0
1275	14	2	4	H.35	0
1276	14	2	4	H.36	0
1277	14	2	4	H.37	0
1278	14	2	4	H.38	0
1279	14	2	4	H.39	0
1280	14	2	4	H.40	0
1281	4	1	1	I.1	1
1282	4	1	1	I.2	1
1283	4	1	1	I.3	0
1284	4	1	1	I.4	0
1285	4	1	1	I.5	0
1286	4	1	1	I.6	0
1287	4	1	1	I.7	0
1288	4	1	1	I.8	0
1289	4	1	1	I.9	0
1290	4	1	1	I.10	0
1291	4	1	1	I.11	0
1292	4	1	1	I.12	0
1293	4	1	1	I.13	0
1294	4	1	1	I.14	0
1295	4	1	1	I.15	0
1296	4	1	1	I.16	0
1297	4	1	1	I.17	0
1298	4	1	1	I.18	0
1299	4	1	1	I.19	0
1300	4	1	1	I.20	0
1301	4	1	1	I.21	0
1302	4	1	1	I.22	0
1303	4	1	1	I.23	0
1304	4	1	1	I.24	0
1305	4	1	1	I.25	0
1306	4	1	1	I.26	0
1307	4	1	1	I.27	0
1308	4	1	1	I.28	0
1309	4	1	1	I.29	0
1310	4	1	1	I.30	0
1311	4	1	1	I.31	0
1312	4	1	1	I.32	0
1313	4	1	1	I.33	0
1314	4	1	1	I.34	0
1315	4	1	1	I.35	0
1316	4	1	1	I.36	0
1317	4	1	1	I.37	0
1318	4	1	1	I.38	0
1319	4	1	1	I.39	0
1320	4	1	1	I.40	0
1321	4	1	2	I.1	0
1322	4	1	2	I.2	0
1323	4	1	2	I.3	1
1324	4	1	2	I.4	1
1325	4	1	2	I.5	1
1326	4	1	2	I.6	0
1327	4	1	2	I.7	0
1328	4	1	2	I.8	0
1329	4	1	2	I.9	0
1330	4	1	2	I.10	0
1331	4	1	2	I.11	0
1332	4	1	2	I.12	0
1333	4	1	2	I.13	0
1334	4	1	2	I.14	0
1335	4	1	2	I.15	0
1336	4	1	2	I.16	0
1337	4	1	2	I.17	0
1338	4	1	2	I.18	0
1339	4	1	2	I.19	0
1340	4	1	2	I.20	0
1341	4	1	2	I.21	0
1342	4	1	2	I.22	0
1343	4	1	2	I.23	0
1344	4	1	2	I.24	0
1345	4	1	2	I.25	0
1346	4	1	2	I.26	0
1347	4	1	2	I.27	0
1348	4	1	2	I.28	0
1349	4	1	2	I.29	0
1350	4	1	2	I.30	0
1351	4	1	2	I.31	0
1352	4	1	2	I.32	0
1353	4	1	2	I.33	0
1354	4	1	2	I.34	0
1355	4	1	2	I.35	0
1356	4	1	2	I.36	0
1357	4	1	2	I.37	0
1358	4	1	2	I.38	0
1359	4	1	2	I.39	0
1360	4	1	2	I.40	0
1361	4	1	3	I.1	0
1362	4	1	3	I.2	0
1363	4	1	3	I.3	0
1364	4	1	3	I.4	1
1365	4	1	3	I.5	0
1366	4	1	3	I.6	1
1367	4	1	3	I.7	0
1368	4	1	3	I.8	0
1369	4	1	3	I.9	0
1370	4	1	3	I.10	0
1371	4	1	3	I.11	0
1372	4	1	3	I.12	0
1373	4	1	3	I.13	0
1374	4	1	3	I.14	0
1375	4	1	3	I.15	0
1376	4	1	3	I.16	0
1377	4	1	3	I.17	0
1378	4	1	3	I.18	0
1379	4	1	3	I.19	0
1380	4	1	3	I.20	0
1381	4	1	3	I.21	0
1382	4	1	3	I.22	0
1383	4	1	3	I.23	0
1384	4	1	3	I.24	0
1385	4	1	3	I.25	0
1386	4	1	3	I.26	0
1387	4	1	3	I.27	0
1388	4	1	3	I.28	0
1389	4	1	3	I.29	0
1390	4	1	3	I.30	0
1391	4	1	3	I.31	0
1392	4	1	3	I.32	0
1393	4	1	3	I.33	0
1394	4	1	3	I.34	0
1395	4	1	3	I.35	0
1396	4	1	3	I.36	0
1397	4	1	3	I.37	0
1398	4	1	3	I.38	0
1399	4	1	3	I.39	0
1400	4	1	3	I.40	0
1401	4	1	4	I.1	0
1402	4	1	4	I.2	0
1403	4	1	4	I.3	1
1404	4	1	4	I.4	0
1405	4	1	4	I.5	0
1406	4	1	4	I.6	1
1407	4	1	4	I.7	0
1408	4	1	4	I.8	0
1409	4	1	4	I.9	0
1410	4	1	4	I.10	0
1411	4	1	4	I.11	0
1412	4	1	4	I.12	0
1413	4	1	4	I.13	0
1414	4	1	4	I.14	0
1415	4	1	4	I.15	0
1416	4	1	4	I.16	0
1417	4	1	4	I.17	0
1418	4	1	4	I.18	0
1419	4	1	4	I.19	0
1420	4	1	4	I.20	0
1421	4	1	4	I.21	0
1422	4	1	4	I.22	0
1423	4	1	4	I.23	0
1424	4	1	4	I.24	0
1425	4	1	4	I.25	0
1426	4	1	4	I.26	0
1427	4	1	4	I.27	0
1428	4	1	4	I.28	0
1429	4	1	4	I.29	0
1430	4	1	4	I.30	0
1431	4	1	4	I.31	0
1432	4	1	4	I.32	0
1433	4	1	4	I.33	0
1434	4	1	4	I.34	0
1435	4	1	4	I.35	0
1436	4	1	4	I.36	0
1437	4	1	4	I.37	0
1438	4	1	4	I.38	0
1439	4	1	4	I.39	0
1440	4	1	4	I.40	0
1441	4	2	1	J.1	1
1442	4	2	1	J.2	1
1443	4	2	1	J.3	1
1444	4	2	1	J.4	0
1445	4	2	1	J.5	0
1446	4	2	1	J.6	0
1447	4	2	1	J.7	0
1448	4	2	1	J.8	0
1449	4	2	1	J.9	0
1450	4	2	1	J.10	0
1451	4	2	1	J.11	0
1452	4	2	1	J.12	0
1453	4	2	1	J.13	0
1454	4	2	1	J.14	0
1455	4	2	1	J.15	0
1456	4	2	1	J.16	0
1457	4	2	1	J.17	0
1458	4	2	1	J.18	0
1459	4	2	1	J.19	0
1460	4	2	1	J.20	0
1461	4	2	1	J.21	0
1462	4	2	1	J.22	0
1463	4	2	1	J.23	0
1464	4	2	1	J.24	0
1465	4	2	1	J.25	0
1466	4	2	1	J.26	0
1467	4	2	1	J.27	0
1468	4	2	1	J.28	0
1469	4	2	1	J.29	0
1470	4	2	1	J.30	0
1471	4	2	1	J.31	0
1472	4	2	1	J.32	0
1473	4	2	1	J.33	0
1474	4	2	1	J.34	0
1475	4	2	1	J.35	0
1476	4	2	1	J.36	0
1477	4	2	1	J.37	0
1478	4	2	1	J.38	0
1479	4	2	1	J.39	0
1480	4	2	1	J.40	0
1481	4	2	2	J.1	0
1482	4	2	2	J.2	0
1483	4	2	2	J.3	1
1484	4	2	2	J.4	1
1485	4	2	2	J.5	0
1486	4	2	2	J.6	0
1487	4	2	2	J.7	0
1488	4	2	2	J.8	0
1489	4	2	2	J.9	0
1490	4	2	2	J.10	0
1491	4	2	2	J.11	0
1492	4	2	2	J.12	0
1493	4	2	2	J.13	0
1494	4	2	2	J.14	0
1495	4	2	2	J.15	0
1496	4	2	2	J.16	0
1497	4	2	2	J.17	0
1498	4	2	2	J.18	0
1499	4	2	2	J.19	0
1500	4	2	2	J.20	0
1501	4	2	2	J.21	0
1502	4	2	2	J.22	0
1503	4	2	2	J.23	0
1504	4	2	2	J.24	0
1505	4	2	2	J.25	0
1506	4	2	2	J.26	0
1507	4	2	2	J.27	0
1508	4	2	2	J.28	0
1509	4	2	2	J.29	0
1510	4	2	2	J.30	0
1511	4	2	2	J.31	0
1512	4	2	2	J.32	0
1513	4	2	2	J.33	0
1514	4	2	2	J.34	0
1515	4	2	2	J.35	0
1516	4	2	2	J.36	0
1517	4	2	2	J.37	0
1518	4	2	2	J.38	0
1519	4	2	2	J.39	0
1520	4	2	2	J.40	0
1561	4	2	4	J.1	1
1562	4	2	4	J.2	0
1563	4	2	4	J.3	0
1564	4	2	4	J.4	0
1565	4	2	4	J.5	1
1566	4	2	4	J.6	0
1567	4	2	4	J.7	0
1568	4	2	4	J.8	0
1569	4	2	4	J.9	0
1570	4	2	4	J.10	0
1571	4	2	4	J.11	0
1572	4	2	4	J.12	0
1573	4	2	4	J.13	0
1574	4	2	4	J.14	0
1575	4	2	4	J.15	0
1576	4	2	4	J.16	0
1577	4	2	4	J.17	0
1578	4	2	4	J.18	0
1579	4	2	4	J.19	0
1580	4	2	4	J.20	0
1581	4	2	4	J.21	0
1582	4	2	4	J.22	0
1583	4	2	4	J.23	0
1584	4	2	4	J.24	0
1585	4	2	4	J.25	0
1586	4	2	4	J.26	0
1587	4	2	4	J.27	0
1588	4	2	4	J.28	0
1589	4	2	4	J.29	0
1590	4	2	4	J.30	0
1591	4	2	4	J.31	0
1592	4	2	4	J.32	0
1593	4	2	4	J.33	0
1594	4	2	4	J.34	0
1595	4	2	4	J.35	0
1596	4	2	4	J.36	0
1597	4	2	4	J.37	0
1598	4	2	4	J.38	0
1599	4	2	4	J.39	0
1600	4	2	4	J.40	0
1601	20	1	1	K.1	1
1602	20	1	1	K.2	1
1603	20	1	1	K.3	0
1604	20	1	1	K.4	0
1605	20	1	1	K.5	0
1606	20	1	1	K.6	0
1607	20	1	1	K.7	0
1608	20	1	1	K.8	0
1609	20	1	1	K.9	0
1610	20	1	1	K.10	0
1611	20	1	1	K.11	0
1612	20	1	1	K.12	0
1613	20	1	1	K.13	0
1614	20	1	1	K.14	0
1615	20	1	1	K.15	0
1616	20	1	1	K.16	0
1617	20	1	1	K.17	0
1618	20	1	1	K.18	0
1619	20	1	1	K.19	0
1620	20	1	1	K.20	0
1621	20	1	1	K.21	0
1622	20	1	1	K.22	0
1623	20	1	1	K.23	0
1624	20	1	1	K.24	0
1625	20	1	1	K.25	0
1626	20	1	1	K.26	0
1627	20	1	1	K.27	0
1628	20	1	1	K.28	0
1629	20	1	1	K.29	0
1630	20	1	1	K.30	0
1631	20	1	1	K.31	0
1632	20	1	1	K.32	0
1633	20	1	1	K.33	0
1634	20	1	1	K.34	0
1635	20	1	1	K.35	0
1636	20	1	1	K.36	0
1637	20	1	1	K.37	0
1638	20	1	1	K.38	0
1639	20	1	1	K.39	0
1640	20	1	1	K.40	0
1641	20	1	2	K.1	0
1642	20	1	2	K.2	0
1643	20	1	2	K.3	1
1644	20	1	2	K.4	1
1645	20	1	2	K.5	0
1646	20	1	2	K.6	0
1647	20	1	2	K.7	0
1648	20	1	2	K.8	0
1649	20	1	2	K.9	0
1650	20	1	2	K.10	0
1651	20	1	2	K.11	0
1652	20	1	2	K.12	0
1653	20	1	2	K.13	0
1654	20	1	2	K.14	0
1655	20	1	2	K.15	0
1656	20	1	2	K.16	0
1657	20	1	2	K.17	0
1658	20	1	2	K.18	0
1659	20	1	2	K.19	0
1660	20	1	2	K.20	0
1661	20	1	2	K.21	0
1662	20	1	2	K.22	0
1663	20	1	2	K.23	0
1664	20	1	2	K.24	0
1665	20	1	2	K.25	0
1666	20	1	2	K.26	0
1667	20	1	2	K.27	0
1668	20	1	2	K.28	0
1669	20	1	2	K.29	0
1670	20	1	2	K.30	0
1671	20	1	2	K.31	0
1672	20	1	2	K.32	0
1673	20	1	2	K.33	0
1674	20	1	2	K.34	0
1675	20	1	2	K.35	0
1676	20	1	2	K.36	0
1677	20	1	2	K.37	0
1678	20	1	2	K.38	0
1679	20	1	2	K.39	0
1680	20	1	2	K.40	0
1681	20	1	3	K.1	0
1682	20	1	3	K.2	0
1683	20	1	3	K.3	1
1684	20	1	3	K.4	0
1685	20	1	3	K.5	0
1686	20	1	3	K.6	0
1687	20	1	3	K.7	0
1688	20	1	3	K.8	0
1689	20	1	3	K.9	0
1690	20	1	3	K.10	0
1691	20	1	3	K.11	0
1692	20	1	3	K.12	0
1693	20	1	3	K.13	0
1694	20	1	3	K.14	0
1695	20	1	3	K.15	0
1696	20	1	3	K.16	0
1697	20	1	3	K.17	0
1698	20	1	3	K.18	0
1699	20	1	3	K.19	0
1700	20	1	3	K.20	0
1701	20	1	3	K.21	0
1702	20	1	3	K.22	0
1703	20	1	3	K.23	0
1704	20	1	3	K.24	0
1705	20	1	3	K.25	0
1706	20	1	3	K.26	0
1707	20	1	3	K.27	0
1708	20	1	3	K.28	0
1709	20	1	3	K.29	0
1710	20	1	3	K.30	0
1711	20	1	3	K.31	0
1712	20	1	3	K.32	0
1713	20	1	3	K.33	0
1714	20	1	3	K.34	0
1715	20	1	3	K.35	0
1716	20	1	3	K.36	0
1717	20	1	3	K.37	0
1718	20	1	3	K.38	0
1719	20	1	3	K.39	0
1720	20	1	3	K.40	0
1721	20	1	4	K.1	0
1722	20	1	4	K.2	0
1723	20	1	4	K.3	0
1724	20	1	4	K.4	0
1725	20	1	4	K.5	1
1726	20	1	4	K.6	1
1727	20	1	4	K.7	0
1728	20	1	4	K.8	0
1729	20	1	4	K.9	0
1730	20	1	4	K.10	0
1731	20	1	4	K.11	0
1732	20	1	4	K.12	0
1733	20	1	4	K.13	0
1734	20	1	4	K.14	0
1735	20	1	4	K.15	0
1736	20	1	4	K.16	0
1737	20	1	4	K.17	0
1738	20	1	4	K.18	0
1739	20	1	4	K.19	0
1740	20	1	4	K.20	0
1741	20	1	4	K.21	0
1742	20	1	4	K.22	0
1743	20	1	4	K.23	0
1744	20	1	4	K.24	0
1745	20	1	4	K.25	0
1746	20	1	4	K.26	0
1747	20	1	4	K.27	0
1748	20	1	4	K.28	0
1749	20	1	4	K.29	0
1750	20	1	4	K.30	0
1751	20	1	4	K.31	0
1752	20	1	4	K.32	0
1753	20	1	4	K.33	0
1754	20	1	4	K.34	0
1755	20	1	4	K.35	0
1756	20	1	4	K.36	0
1757	20	1	4	K.37	0
1758	20	1	4	K.38	0
1759	20	1	4	K.39	0
1760	20	1	4	K.40	0
1761	20	2	1	L.1	1
1762	20	2	1	L.2	1
1763	20	2	1	L.3	0
1764	20	2	1	L.4	0
1765	20	2	1	L.5	0
1766	20	2	1	L.6	0
1767	20	2	1	L.7	0
1768	20	2	1	L.8	0
1769	20	2	1	L.9	0
1770	20	2	1	L.10	0
1771	20	2	1	L.11	0
1772	20	2	1	L.12	0
1773	20	2	1	L.13	0
1774	20	2	1	L.14	0
1775	20	2	1	L.15	0
1776	20	2	1	L.16	0
1777	20	2	1	L.17	0
1778	20	2	1	L.18	0
1779	20	2	1	L.19	0
1780	20	2	1	L.20	0
1781	20	2	1	L.21	0
1782	20	2	1	L.22	0
1783	20	2	1	L.23	0
1784	20	2	1	L.24	0
1785	20	2	1	L.25	0
1786	20	2	1	L.26	0
1787	20	2	1	L.27	0
1788	20	2	1	L.28	0
1789	20	2	1	L.29	0
1790	20	2	1	L.30	0
1791	20	2	1	L.31	0
1792	20	2	1	L.32	0
1793	20	2	1	L.33	0
1794	20	2	1	L.34	0
1795	20	2	1	L.35	0
1796	20	2	1	L.36	0
1797	20	2	1	L.37	0
1798	20	2	1	L.38	0
1799	20	2	1	L.39	0
1800	20	2	1	L.40	0
1801	20	2	2	L.1	1
1802	20	2	2	L.2	0
1803	20	2	2	L.3	0
1804	20	2	2	L.4	0
1805	20	2	2	L.5	0
1806	20	2	2	L.6	0
1807	20	2	2	L.7	0
1808	20	2	2	L.8	0
1809	20	2	2	L.9	0
1810	20	2	2	L.10	0
1811	20	2	2	L.11	0
1812	20	2	2	L.12	0
1813	20	2	2	L.13	0
1814	20	2	2	L.14	0
1815	20	2	2	L.15	0
1816	20	2	2	L.16	0
1817	20	2	2	L.17	0
1818	20	2	2	L.18	0
1819	20	2	2	L.19	0
1820	20	2	2	L.20	0
1821	20	2	2	L.21	0
1822	20	2	2	L.22	0
1823	20	2	2	L.23	0
1824	20	2	2	L.24	0
1825	20	2	2	L.25	0
1826	20	2	2	L.26	0
1827	20	2	2	L.27	0
1828	20	2	2	L.28	0
1829	20	2	2	L.29	0
1830	20	2	2	L.30	0
1831	20	2	2	L.31	0
1832	20	2	2	L.32	0
1833	20	2	2	L.33	0
1834	20	2	2	L.34	0
1835	20	2	2	L.35	0
1836	20	2	2	L.36	0
1837	20	2	2	L.37	0
1838	20	2	2	L.38	0
1839	20	2	2	L.39	0
1840	20	2	2	L.40	0
1841	20	2	3	L.1	1
1842	20	2	3	L.2	0
1843	20	2	3	L.3	1
1844	20	2	3	L.4	1
1845	20	2	3	L.5	0
1846	20	2	3	L.6	0
1847	20	2	3	L.7	0
1848	20	2	3	L.8	0
1849	20	2	3	L.9	0
1850	20	2	3	L.10	0
1851	20	2	3	L.11	0
1852	20	2	3	L.12	0
1853	20	2	3	L.13	0
1854	20	2	3	L.14	0
1855	20	2	3	L.15	0
1856	20	2	3	L.16	0
1857	20	2	3	L.17	0
1858	20	2	3	L.18	0
1859	20	2	3	L.19	0
1860	20	2	3	L.20	0
1861	20	2	3	L.21	0
1862	20	2	3	L.22	0
1863	20	2	3	L.23	0
1864	20	2	3	L.24	0
1865	20	2	3	L.25	0
1866	20	2	3	L.26	0
1867	20	2	3	L.27	0
1868	20	2	3	L.28	0
1869	20	2	3	L.29	0
1870	20	2	3	L.30	0
1871	20	2	3	L.31	0
1872	20	2	3	L.32	0
1873	20	2	3	L.33	0
1874	20	2	3	L.34	0
1875	20	2	3	L.35	0
1876	20	2	3	L.36	0
1877	20	2	3	L.37	0
1878	20	2	3	L.38	0
1879	20	2	3	L.39	0
1880	20	2	3	L.40	0
1881	20	2	4	L.1	1
1882	20	2	4	L.2	0
1883	20	2	4	L.3	0
1884	20	2	4	L.4	0
1885	20	2	4	L.5	0
1886	20	2	4	L.6	0
1887	20	2	4	L.7	0
1888	20	2	4	L.8	0
1889	20	2	4	L.9	0
1890	20	2	4	L.10	0
1891	20	2	4	L.11	0
1892	20	2	4	L.12	0
1893	20	2	4	L.13	0
1894	20	2	4	L.14	0
1895	20	2	4	L.15	0
1896	20	2	4	L.16	0
1897	20	2	4	L.17	0
1898	20	2	4	L.18	0
1899	20	2	4	L.19	0
1900	20	2	4	L.20	0
1901	20	2	4	L.21	0
1902	20	2	4	L.22	0
1903	20	2	4	L.23	0
1904	20	2	4	L.24	0
1905	20	2	4	L.25	0
1906	20	2	4	L.26	0
1907	20	2	4	L.27	0
1908	20	2	4	L.28	0
1909	20	2	4	L.29	0
1910	20	2	4	L.30	0
1911	20	2	4	L.31	0
1912	20	2	4	L.32	0
1913	20	2	4	L.33	0
1914	20	2	4	L.34	0
1915	20	2	4	L.35	0
1916	20	2	4	L.36	0
1917	20	2	4	L.37	0
1918	20	2	4	L.38	0
1919	20	2	4	L.39	0
1920	20	2	4	L.40	0

## Sheet: Rep_within_Trials
ColID	TimeOneTool	Rep	IndID
Colony 14	50	1	1		Column B: Time (seconds) required to transport each tool during consecutive transports by the same worker within a trail
Colony 14	24	2	1		C: Repeats = time (seconds) to transport the second (1), third (2) and fourth (3) tool
Colony 14	22	3	1		D: Individual ant ID
Colony 14	58	1	2
Colony 14	69	2	2
Colony 14	25	3	2
Colony 14	35	1	3
Colony 14	33	2	3
Colony 14	45	3	3
Colony 14	137	1	4
Colony 14	78	2	4
Colony 14	78	3	4
Colony 17	43	1	5
Colony 17	4	2	5
Colony 17	31	3	5
Colony 19	48	1	6
Colony 19	30	2	6
Colony 19	40	3	6
Colony 20	190	1	7
Colony 20	50	2	7
Colony 20	27	3	7
Colony 20	120	1	8
Colony 20	106	2	8
Colony 20	40	3	8
Colony 20	119	1	9
Colony 20	47	2	9
Colony 20	31	3	9
Colony 20	487	1	10
Colony 20	81	2	10
Colony 20	23	3	10
Colony 20	26	1	11
Colony 20	34	2	11
Colony 20	19	3	11
Colony 20	79	1	12
Colony 20	465	2	12
Colony 20	73	3	12
Colony 2	52	1	13
Colony 2	24	2	13
Colony 2	20	3	13
Colony 2	42	1	14
Colony 2	38	2	14
Colony 2	18	3	14
Colony 2	23	1	15
Colony 2	37	2	15
Colony 2	79	3	15
Colony 4	366	1	16
Colony 4	101	2	16
Colony 4	19	3	16
Colony 4	158	1	17
Colony 4	36	2	17
Colony 4	94	3	17
Colony 4	452	1	18
Colony 4	195	2	18
Colony 4	33	3	18

## Sheet: Rep_between_Trials
ColID	AverOneTool	Repbetween
Colony 14	28.6	1		Column B: Average time (seconds) needed to transport one tool by the same worker between the trials
Colony 14	75.25	2		C: Repeats = average time (seconds) to transport a tool during the first (1), second (2) and third (3) trial
Colony 14	45.5	3
Colony 17	128	1
Colony 17	60	1
Colony 17	225	1
Colony 17	127.333	2
Colony 17	69.76	2
Colony 17	101	2
Colony 17	41.3333	3
Colony 19	37.6667	1
Colony 19	70	1
Colony 19	26	2
Colony 19	55.5	2
Colony 2	42.6667	1
Colony 2	223	1
Colony 2	40	2
Colony 2	514	2
Colony 2	48.8	3
Colony 20	55	1
Colony 20	115	1
Colony 20	351	2
Colony 20	27	2
Colony 20	145	3
Colony 4	1168	1
Colony 4	123.75	1
Colony 4	44	2
Colony 4	1260	2
Colony 4	60	3

## Sheet: Worker_Interference
ColID	SubcolID	TimeOneTool	BefAftInterfer
Colony 14	SUB 1	41	1		The influence of ‘interference’ of another worker on a worker's performance
Colony 14	SUB 1	30	2
Colony 14	SUB 1	32	1		C: Time (seconds) to transport one tool before (1) and after (2) interference
Colony 14	SUB 1	41	2
Colony 14	SUB 2	55	1
Colony 14	SUB 2	49	2
Colony 14	SUB 2	25	1
Colony 14	SUB 2	28	1
Colony 14	SUB 2	97	2
Colony 14	SUB 2	84	2
Colony 17	SUB 1	60	1
Colony 17	SUB 1	380	1
Colony 17	SUB 1	60	2
Colony 17	SUB 1	70	2
Colony 17	SUB 1	99	1
Colony 17	SUB 1	101	1
Colony 17	SUB 1	121	2
Colony 17	SUB 1	27	1
Colony 17	SUB 1	165	2
Colony 17	SUB 1	25	2
Colony 17	SUB 1	28	1
Colony 17	SUB 1	29	2
Colony 17	SUB 2	128	1
Colony 17	SUB 2	70	2
Colony 17	SUB 2	66	1
Colony 17	SUB 2	60	2
Colony 17	SUB 2	61	1
Colony 17	SUB 2	36	2
Colony 17	SUB 2	38	1
Colony 17	SUB 2	24	1
Colony 17	SUB 2	40	2
Colony 17	SUB 2	29	2
Colony 19	SUB 1	31	1
Colony 19	SUB 1	121	2
Colony 19	SUB 1	68	1
Colony 19	SUB 1	57	2
Colony 19	SUB 1	31	1
Colony 19	SUB 1	52	2
Colony 19	SUB 1	36	1
Colony 19	SUB 1	38	2
Colony 19	SUB 2	40	1
Colony 19	SUB 2	28	2
Colony 19	SUB 2	17	1
Colony 19	SUB 2	43	2
Colony 19	SUB 2	18	1
Colony 19	SUB 2	26	2
Colony 2	SUB 1	141	1
Colony 2	SUB 1	122	2
Colony 2	SUB 1	120	1
Colony 2	SUB 1	44	2
Colony 2	SUB 2	26	1
Colony 2	SUB 2	39	2
Colony 2	SUB 2	68	1
Colony 2	SUB 2	79	2
Colony 20	SUB 1	31	1
Colony 20	SUB 1	138	2
Colony 20	SUB 2	151	1
Colony 20	SUB 2	367	2
Colony 4	SUB 1	94	1
Colony 4	SUB 1	31	2
Colony 4	SUB 1	54	1
Colony 4	SUB 1	57	2
Colony 4	SUB 1	44	1
Colony 4	SUB 1	60	2
Colony 4	SUB 2	366	1
Colony 4	SUB 2	101	2

## Sheet: Effect of pre-trial
ColID	SubcolID	FirstTool	Tottime	Nr.Work
Col14	sub1	105	305	3		The effect of the pre-trial on the characteristics of the tool transport to the bait
Col14	sub2	664	962	4
Col17	sub1	396	624	5		C: Latency (seconds) to transport the first tool to the bait
Col17	sub2	750	350	6		D: Total time (seconds) of tool transport
Col19	sub1	207	403	5		E: Number of workers involved in tool use
Col19	sub2	80	87	4
Col2	sub1	1346	596	4
Col2	sub2	447	384	1
Col20	sub1	2524	724	2
Col20	sub2	330	558	2
Col4	sub1	3378	772	2
Col4	sub2	3112	639	3
