# Supplementary material for: A small number of workers with specific personality traits perform tool use in ants
Source: eLife. 2020 Dec 9;9:e61298. doi: 10.7554/eLife.61298 (PMC7725502; doi:10.7554/eLife.61298)
Supplement: Source data 3. [file elife-61298-data3.xlsx]

## Sheet: Rep
WorkID	ColID	TotCenter	WalkPeriph	ContactPrey
1	Col22	55	114	4		Repeatability across the two sessions of the open-field and the reaction to prey test
2	Col22	23	91	8
3	Col22	33	117	161		Column C: Total time (seconds) spent in the central area of the open-field
4	Col22	34	121	4		D: Time spent (seconds) walking in the periphery
5	Col22	26	143	0		E: Total time spent (seconds) in contact with the prey
6	Col22	27	113	166
7	Col22	43	116	7
8	Col22	63	87	2
9	Col22	36	132	11
10	Col22	55	79	170
11	Col22	18	135	0
12	Col22	28	109	4
13	Col22	80	92	9
14	Col22	55	69	16
15	Col22	28	125	0
16	Col22	17	155	3
17	Col22	55	116	1
18	Col22	19	141	1
19	Col22	18	136	0
20	Col20	42	117	1
21	Col20	48	118	8
22	Col20	84	93	172
23	Col20	40	129	9
24	Col20	27	129	3
25	Col20	37	121	2
26	Col20	42	135	1
27	Col20	52	113	111
28	Col20	28	149	2
29	Col20	75	104	5
30	Col20	30	146	3
31	Col20	90	79	1
32	Col20	67	108	6
33	Col20	37	140	1
34	Col20	20	156	1
35	Col20	12	167	1
36	Col20	19	153	0
37	Col20	70	106	2
38	Col20	31	148	0
39	Col19	22	120	1
40	Col19	43	127	0
41	Col19	55	123	2
42	Col19	30	134	2
43	Col19	27	141	2
44	Col19	36	138	5
45	Col19	43	128	3
46	Col19	42	130	5
47	Col19	40	124	166
48	Col19	38	112	10
49	Col19	37	138	8
50	Col19	25	145	5
51	Col19	38	128	3
52	Col19	50	117	1
53	Col19	29	142	0
54	Col19	49	126	6
55	Col19	16	136	0
56	Col19	32	141	1
57	Col19	42	121	1
58	Col19	25	143	2
59	Col5	43	130	2
60	Col5	64	114	2
61	Col5	29	137	9
62	Col5	57	113	5
63	Col5	53	115	0
64	Col5	50	89	6
65	Col5	42	137	3
66	Col5	42	134	131
67	Col5	59	111	6
68	Col5	45	126	3
69	Col5	66	108	5
70	Col5	50	106	1
71	Col5	56	123	9
72	Col5	39	123	0
73	Col5	34	143	1
74	Col5	54	113	4
75	Col5	26	120	2
76	Col5	46	130	0
77	Col14	40	120	2
78	Col14	41	132	12
79	Col14	51	80	6
80	Col14	47	125	1
81	Col14	30	124	2
82	Col14	48	121	3
83	Col14	40	139	5
84	Col14	62	92	5
85	Col14	39	120	6
86	Col14	61	98	8
87	Col14	46	116	3
88	Col14	34	125	4
89	Col14	57	78	2
90	Col14	33	124	5
91	Col14	42	129	1
92	Col14	32	133	1
93	Col14	46	72	1
94	Col14	43	129	0
95	Col14	31	146	0
96	Col21	80	69	2
97	Col21	33	140	4
98	Col21	37	143	8
99	Col21	48	116	2
100	Col21	21	142	6
101	Col21	45	129	9
102	Col21	16	113	4
103	Col21	36	138	0
104	Col21	24	145	1
105	Col21	23	153	3
106	Col21	36	135	4
107	Col21	45	82	4
108	Col21	43	123	5
109	Col21	46	128	0
110	Col21	21	156	6
111	Col21	6	3	1
112	Col21	35	145	1
113	Col21	49	130	0
114	Col21	37	138	2
115	Col21	19	148	1
116	Col4	36	115	18
117	Col4	45	121	79
118	Col4	27	150	11
119	Col4	43	103	5
120	Col4	20	10	2
121	Col4	25	153	4
122	Col4	18	150	1
123	Col4	70	99	7
124	Col4	37	135	171
125	Col4	28	132	5
126	Col4	26	149	10
127	Col4	33	123	4
128	Col4	30	140	5
129	Col4	72	99	174
130	Col4	32	145	0
131	Col4	37	139	1
132	Col4	44	133	1
133	Col4	49	125	0
134	Col4	23	157	0
135	Col17	23	113	1
136	Col17	30	142	1
137	Col17	73	101	2
138	Col17	54	96	7
139	Col17	20	141	2
140	Col17	39	118	170
141	Col17	40	126	2
142	Col17	68	101	15
143	Col17	43	130	3
144	Col17	13	145	10
145	Col17	41	132	3
146	Col17	43	113	148
147	Col17	45	123	128
148	Col17	40	134	9
149	Col17	18	154	11
150	Col17	10	169	1
151	Col17	20	133	0
152	Col17	46	128	0
153	Col17	11	161	0
154	Col17	29	109	0
1	Col22	98	67	3
2	Col22	38	97	3
3	Col22	48	111	168
4	Col22	60	108	3
5	Col22	56	101	3
6	Col22	46	134	1
7	Col22	39	127	1
8	Col22	57	90	1
9	Col22	55	117	3
10	Col22	57	116	144
11	Col22	13	133	0
12	Col22	40	131	1
13	Col22	79	93	157
14	Col22	46	116	0
15	Col22	41	113	0
16	Col22	62	115	2
17	Col22	3	127	1
18	Col22	19	132	1
19	Col22	21	146	1
20	Col20	41	123	1
21	Col20	47	125	2
22	Col20	46	122	161
23	Col20	40	140	2
24	Col20	26	146	0
25	Col20	102	60	1
26	Col20	62	96	2
27	Col20	32	131	145
28	Col20	22	153	8
29	Col20	88	88	2
30	Col20	49	126	3
31	Col20	54	119	21
32	Col20	66	93	3
33	Col20	41	139	1
34	Col20	27	150	0
35	Col20	13	164	1
36	Col20	14	160	1
37	Col20	65	112	0
38	Col20	43	135	0
39	Col19	52	120	0
40	Col19	37	130	0
41	Col19	32	141	0
42	Col19	25	146	2
43	Col19	20	85	3
44	Col19	31	142	4
45	Col19	35	132	5
46	Col19	42	137	0
47	Col19	47	110	9
48	Col19	34	132	5
49	Col19	21	149	41
50	Col19	19	153	1
51	Col19	25	146	0
52	Col19	52	116	157
53	Col19	35	138	0
54	Col19	38	136	0
55	Col19	18	140	0
56	Col19	36	137	1
57	Col19	44	128	2
58	Col19	60	119	1
59	Col5	58	107	1
60	Col5	143	23	9
61	Col5	45	121	4
62	Col5	46	120	4
63	Col5	75	92	2
64	Col5	46	85	0
65	Col5	34	143	0
66	Col5	46	128	2
67	Col5	63	116	15
68	Col5	41	132	4
69	Col5	69	111	5
70	Col5	36	135	4
71	Col5	47	98	1
72	Col5	33	132	3
73	Col5	29	146	0
74	Col5	33	140	0
75	Col5	24	130	1
76	Col5	32	99	0
77	Col14	52	92	0
78	Col14	48	107	1
79	Col14	55	117	0
80	Col14	36	129	4
81	Col14	34	123	4
82	Col14	51	124	1
83	Col14	38	136	3
84	Col14	43	113	5
85	Col14	69	97	2
86	Col14	43	121	4
87	Col14	44	133	2
88	Col14	51	100	9
89	Col14	55	83	1
90	Col14	46	107	3
91	Col14	48	131	1
92	Col14	23	157	1
93	Col14	41	139	0
94	Col14	50	119	1
95	Col14	38	141	1
96	Col21	44	130	1
97	Col21	68	104	7
98	Col21	48	104	4
99	Col21	51	126	2
100	Col21	22	145	2
101	Col21	39	126	3
102	Col21	35	136	3
103	Col21	41	136	0
104	Col21	27	140	3
105	Col21	54	117	13
106	Col21	26	133	1
107	Col21	51	124	2
108	Col21	40	126	6
109	Col21	44	124	0
110	Col21	26	152	3
111	Col21	29	151	1
112	Col21	28	147	1
113	Col21	23	143	1
114	Col21	28	150	0
115	Col21	15	150	0
116	Col4	16	147	20
117	Col4	46	123	83
118	Col4	28	151	6
119	Col4	25	109	2
120	Col4	39	118	4
121	Col4	42	125	2
122	Col4	43	120	2
123	Col4	72	94	19
124	Col4	63	102	164
125	Col4	29	125	1
126	Col4	39	129	30
127	Col4	31	128	22
128	Col4	27	145	4
129	Col4	60	106	70
130	Col4	37	143	1
131	Col4	40	140	0
132	Col4	40	99	0
133	Col4	36	144	0
134	Col4	19	150	0
135	Col17	23	84	1
136	Col17	31	139	2
137	Col17	49	132	1
138	Col17	31	140	143
139	Col17	29	130	1
140	Col17	52	130	167
141	Col17	38	108	0
142	Col17	19	141	2
143	Col17	26	154	15
144	Col17	10	150	2
145	Col17	46	131	6
146	Col17	36	124	159
147	Col17	38	112	4
148	Col17	50	121	5
149	Col17	14	161	153
150	Col17	9	171	1
151	Col17	15	140	0
152	Col17	33	147	0
153	Col17	13	150	1
154	Col17	34	146	0

## Sheet: Repeatability and PCA
WorkID	ColID	ToolUser	Total Time Center 1	Total Time Center 2	Time (sec) Walking Periphery 1	Time Walking Periphery 2	Time (sec) Contact Prey 1	Time Contact Prey 2	TotTimeCenter	WalkPeripher	ContactPrey	PersScore
1	Col22	No	55	98	114	67	4	3	76.5	90.5	3.5	2.25854		Repeatability across the two sessions of the open-field and the reaction to prey test
2	Col22	Yes	23	38	91	97	8	3	30.5	94	5.5	0.0587547
3	Col22	Yes	33	48	117	111	161	168	40.5	114	164.5	1.06917		Columns D,E: Total time spent in the central area of the open-field (seconds)
4	Col22	No	34	60	121	108	4	3	47	114.5	3.5	0.0499826		F,G: Time spent walking in the periphery (seconds)
5	Col22	Yes	26	56	143	101	0	3	41	122	1.5	-0.510107		H,I: Total time spent in contact with the prey (seconds)
6	Col22	Yes	27	46	113	134	166	1	36.5	123.5	83.5	-0.108554
7	Col22	No	43	39	116	127	7	1	41	121.5	4	-0.471879		Principal Component Analysis used to calculate a ‘personality score’ for each ant based on:
8	Col22	No	63	57	87	90	2	1	60	88.5	1.5	1.56544
9	Col22	No	36	55	132	117	11	3	45.5	124.5	7	-0.35194		J: Average total time spent in the central area of the open field
10	Col22	Yes	55	57	79	116	170	144	56	97.5	157	2.31001		K: Average time spent walking in the periphery of the open field
11	Col22	No	18	13	135	133	0	0	15.5	134	0	-2.1147		l: Average time spent in contact with the prey
12	Col22	No	28	40	109	131	4	1	34	120	2.5	-0.74758
13	Col22	Yes	80	79	92	93	9	157	79.5	92.5	83	2.96249		M: The score is the first principal component normalized by subtracting the mean value of the colony
14	Col22	No	55	46	69	116	16	0	50.5	92.5	8	1.04152
15	Col22	No	28	41	125	113	0	0	34.5	119	0	-0.708803
16	Col22	No	17	62	155	115	3	2	39.5	135	2.5	-1.04075
17	Col22	No	55	3	116	127	1	1	29	121.5	1	-1.04104
18	Col22	No	19	19	141	132	1	1	19	136.5	1	-2.03818
19	Col22	No	18	21	136	146	0	1	19.5	141	0.5	-2.18239
20	Col20	No	42	41	117	123	1	1	41.5	120	1	-0.0963842
21	Col20	Yes	48	47	118	125	8	2	47.5	121.5	5	0.154029
22	Col20	Yes	84	46	93	122	172	161	65	107.5	166.5	2.75592
23	Col20	No	40	40	129	140	9	2	40	134.5	5.5	-0.653145
24	Col20	No	27	26	129	146	3	0	26.5	137.5	1.5	-1.40708
25	Col20	Yes	37	102	121	60	2	1	69.5	90.5	1.5	2.24716
26	Col20	No	42	62	135	96	1	2	52	115.5	1.5	0.547412
27	Col20	Yes	52	32	113	131	111	145	42	122	128	0.876476
28	Col20	Yes	28	22	149	153	2	8	25	151	5	-1.93569
29	Col20	No	75	88	104	88	5	2	81.5	96	3.5	2.60918
30	Col20	No	30	49	146	126	3	3	39.5	136	3	-0.750279
31	Col20	Yes	90	54	79	119	1	21	72	99	11	2.12951
32	Col20	Yes	67	66	108	93	6	3	66.5	100.5	4.5	1.77308
33	Col20	No	37	41	140	139	1	1	39	139.5	1	-0.915783
34	Col20	No	20	27	156	150	1	0	23.5	153	0.5	-2.11245
35	Col20	No	12	13	167	164	1	1	12.5	165.5	1	-3.06048
36	Col20	No	19	14	153	160	0	1	16.5	156.5	0.5	-2.55706
37	Col20	No	70	65	106	112	2	0	67.5	109	1	1.48264
38	Col20	No	31	43	148	135	0	0	37	141.5	0	-1.08706
39	Col19	No	22	52	120	120	1	0	37	120	0.5	0.386625
40	Col19	No	43	37	127	130	0	0	40	128.5	0	0.21117
41	Col19	No	55	32	123	141	2	0	43.5	132	1	0.25149
42	Col19	No	30	25	134	146	2	2	27.5	140	2	-0.756716
43	Col19	Yes	27	20	141	85	2	3	23.5	113	2.5	0.0429795
44	Col19	Yes	36	31	138	142	5	4	33.5	140	4.5	-0.464084
45	Col19	No	43	35	128	132	3	5	39	130	4	0.143663
46	Col19	No	42	42	130	137	5	0	42	133.5	2.5	0.141145
47	Col19	Yes	40	47	124	110	166	9	43.5	117	87.5	1.49092
48	Col19	Yes	38	34	112	132	10	5	36	122	7.5	0.325173
49	Col19	Yes	37	21	138	149	8	41	29	143.5	24.5	-0.634122
50	Col19	No	25	19	145	153	5	1	22	149	3	-1.32424
51	Col19	No	38	25	128	146	3	0	31.5	137	1.5	-0.47048
52	Col19	Yes	50	52	117	116	1	157	51	116.5	79	1.78121
53	Col19	No	29	35	142	138	0	0	32	140	0	-0.568441
54	Col19	No	49	38	126	136	6	0	43.5	131	3	0.303791
55	Col19	No	16	18	136	140	0	0	17	138	0	-1.1773
56	Col19	No	32	36	141	137	1	1	34	139	1	-0.433358
57	Col19	No	42	44	121	128	1	2	43	124.5	1.5	0.50429
58	Col19	No	25	60	143	119	2	1	42.5	131	1.5	0.246296
59	Col5	No	43	58	130	107	2	1	50.5	118.5	1.5	0.000788128
60	Col5	No	64	143	114	23	2	9	103.5	68.5	5.5	4.24999
61	Col5	Yes	29	45	137	121	9	4	37	129	6.5	-0.952163
62	Col5	No	57	46	113	120	5	4	51.5	116.5	4.5	0.142755
63	Col5	No	53	75	115	92	0	2	64	103.5	1	1.15286
64	Col5	Yes	50	46	89	85	6	0	48	87	3	1.03955
65	Col5	No	42	34	137	143	3	0	38	140	1.5	-1.34518
66	Col5	Yes	42	46	134	128	131	2	44	131	66.5	-0.223545
67	Col5	Yes	59	63	111	116	6	15	61	113.5	10.5	0.731122
68	Col5	No	45	41	126	132	3	4	43	129	3.5	-0.703814
69	Col5	Yes	66	69	108	111	5	5	67.5	109.5	5	1.12684
70	Col5	Yes	50	36	106	135	1	4	43	120.5	2.5	-0.404185
71	Col5	No	56	47	123	98	9	1	51.5	110.5	5	0.363968
72	Col5	No	39	33	123	132	0	3	36	127.5	1.5	-0.983541
73	Col5	No	34	29	143	146	1	0	31.5	144.5	0.5	-1.81133
74	Col5	No	54	33	113	140	4	0	43.5	126.5	2	-0.602689
75	Col5	No	26	24	120	130	2	1	25	125	1.5	-1.39264
76	Col5	No	46	32	130	99	0	0	39	114.5	0	-0.388797
77	Col14	No	40	52	120	92	2	0	46	106	1	0.479398
78	Col14	No	41	48	132	107	12	1	44.5	119.5	6.5	-0.0331139
79	Col14	Yes	51	55	80	117	6	0	53	98.5	3	1.0849
80	Col14	Yes	47	36	125	129	1	4	41.5	127	2.5	-0.473055
81	Col14	No	30	34	124	123	2	4	32	123.5	3	-0.773801
82	Col14	No	48	51	121	124	3	1	49.5	122.5	2	0.0491471
83	Col14	Yes	40	38	139	136	5	3	39	137.5	4	-0.954597
84	Col14	No	62	43	92	113	5	5	52.5	102.5	5	0.933508
85	Col14	No	39	69	120	97	6	2	54	108.5	4	0.776396
86	Col14	No	61	43	98	121	8	4	52	109.5	6	0.665467
87	Col14	No	46	44	116	133	3	2	45	124.5	2.5	-0.2236
88	Col14	No	34	51	125	100	4	9	42.5	112.5	6.5	0.129436
89	Col14	Yes	57	55	78	83	2	1	56	80.5	1.5	1.86064
90	Col14	Yes	33	46	124	107	5	3	39.5	115.5	4	-0.135538
91	Col14	No	42	48	129	131	1	1	45	130	1	-0.434765
92	Col14	No	32	23	133	157	1	1	27.5	145	1	-1.77253
93	Col14	No	46	41	72	139	1	0	43.5	105.5	0.5	0.379928
94	Col14	Yes	43	50	129	119	0	1	46.5	124	0.5	-0.153479
95	Col14	No	31	38	146	141	0	1	34.5	143.5	0.5	-1.40434
96	Col21	No	80	44	69	130	2	1	62	99.5	1.5	2.22045
97	Col21	Yes	33	68	140	104	4	7	50.5	122	5.5	0.915905
98	Col21	Yes	37	48	143	104	8	4	42.5	123.5	6	0.502296
99	Col21	Yes	48	51	116	126	2	2	49.5	121	2	0.878505
100	Col21	No	21	22	142	145	6	2	21.5	143.5	4	-1.19152
101	Col21	Yes	45	39	129	126	9	3	42	127.5	6	0.334796
102	Col21	Yes	16	35	113	136	4	3	25.5	124.5	3.5	-0.326124
103	Col21	No	36	41	138	136	0	0	38.5	137	0	-0.216352
104	Col21	No	24	27	145	140	1	3	25.5	142.5	2	-0.98976
105	Col21	Yes	23	54	153	117	3	13	38.5	135	8	-0.0795438
106	Col21	Yes	36	26	135	133	4	1	31	134	2.5	-0.428259
107	Col21	No	45	51	82	124	4	2	48	103	3	1.46999
108	Col21	Yes	43	40	123	126	5	6	41.5	124.5	5.5	0.416655
109	Col21	No	46	44	128	124	0	0	45	126	0	0.477035
110	Col21	No	21	26	156	152	6	3	23.5	154	4.5	-1.47674
111	Col21	No	6	29	3	151	1	1	17.5	77	1	1.0098
112	Col21	No	35	28	145	147	1	1	31.5	146	1	-0.852
113	Col21	No	49	23	130	143	0	1	36	136.5	0.5	-0.30777
114	Col21	Yes	37	28	138	150	2	0	32.5	144	1	-0.734188
115	Col21	No	19	15	148	150	1	0	17	149	0.5	-1.62317
116	Col4	Yes	36	16	115	147	18	20	26	131	19	-0.760756
117	Col4	Yes	45	46	121	123	79	83	45.5	122	81	0.949856
118	Col4	Yes	27	28	150	151	11	6	27.5	150.5	8.5	-1.48303
119	Col4	No	43	25	103	109	5	2	34	106	3.5	0.382726
120	Col4	Yes	20	39	10	118	2	4	29.5	64	3	1.69463
121	Col4	Yes	25	42	153	125	4	2	33.5	139	3	-0.838533
122	Col4	No	18	43	150	120	1	2	30.5	135	1.5	-0.842071
123	Col4	Yes	70	72	99	94	7	19	71	96.5	13	2.48353
124	Col4	Yes	37	63	135	102	171	164	50	118.5	167.5	1.97738
125	Col4	No	28	29	132	125	5	1	28.5	128.5	3	-0.685543
126	Col4	No	26	39	149	129	10	30	32.5	139	20	-0.747074
127	Col4	Yes	33	31	123	128	4	22	32	125.5	13	-0.337474
128	Col4	No	30	27	140	145	5	4	28.5	142.5	4.5	-1.18023
129	Col4	Yes	72	60	99	106	174	70	66	102.5	122	2.91688
130	Col4	No	32	37	145	143	0	1	34.5	144	0.5	-0.994234
131	Col4	No	37	40	139	140	1	0	38.5	139.5	0.5	-0.649675
132	Col4	No	44	40	133	99	1	0	42	116	0.5	0.359932
133	Col4	No	49	36	125	144	0	0	42.5	134.5	0	-0.291043
134	Col4	No	23	19	157	150	0	0	21	153.5	0	-1.95527
135	Col17	Yes	23	23	113	84	1	1	23	98.5	1	0.550225
136	Col17	No	30	31	142	139	1	2	30.5	140.5	1.5	-0.625424
137	Col17	No	73	49	101	132	2	1	61	116.5	1.5	1.62855
138	Col17	Yes	54	31	96	140	7	143	42.5	118	75	1.32582
139	Col17	No	20	29	141	130	2	1	24.5	135.5	1.5	-0.716939
140	Col17	No	39	52	118	130	170	167	45.5	124	168.5	1.99771
141	Col17	No	40	38	126	108	2	0	39	117	1	0.607243
142	Col17	Yes	68	19	101	141	15	2	43.5	121	8.5	0.727216
143	Col17	No	43	26	130	154	3	15	34.5	142	9	-0.437665
144	Col17	No	13	10	145	150	10	2	11.5	147.5	6	-1.7055
145	Col17	No	41	46	132	131	3	6	43.5	131.5	4.5	0.314934
146	Col17	Yes	43	36	113	124	148	159	39.5	118.5	153.5	1.80352
147	Col17	Yes	45	38	123	112	128	4	41.5	117.5	66	1.22604
148	Col17	Yes	40	50	134	121	9	5	45	127.5	7	0.54798
149	Col17	Yes	18	14	154	161	11	153	16	157.5	82	-1.25119
150	Col17	No	10	9	169	171	1	1	9.5	170	1	-2.65104
151	Col17	No	20	15	133	140	0	0	17.5	136.5	0	-1.08313
152	Col17	No	46	33	128	147	0	0	39.5	137.5	0	-0.120153
153	Col17	No	11	13	161	150	0	1	12	155.5	0.5	-2.01666
154	Col17	No	29	34	109	146	0	0	31.5	127.5	0	-0.121514

## Sheet: Latency_and_Time_contact_prey
WorkID	ColID	ToolUser	Lat1	ContactPrey1	Lat2	ContactPrey2	Lat	ContactPrey
1	Col22	No	14	4	14	3	14	3.5		Correlation between the latency to find the prey and time spent in contact with the prey during the open-field tests
2	Col22	Yes	34	8	15	3	24.5	5.5
3	Col22	Yes	19	161	13	168	16	164.5		Columns D,F: Latency (seconds) to find the prey in the first (D) and in the second (F) session of the open-field test
4	Col22	No	19	4	26	3	22.5	3.5		E,G: Total time spent (seconds) in contact with the prey in the first (E) and in the second session (G) of the open-field test
5	Col22	Yes	0	0	48	3	24	1.5		H,I: Average latency (seconds) to find the prey (H) and time spent in contact with the prey (I)
6	Col22	Yes	14	166	109	1	61.5	83.5
7	Col22	No	106	7	115	1	110.5	4
8	Col22	No	35	2	48	1	41.5	1.5
9	Col22	No	4	11	134	3	69	7
10	Col22	Yes	10	170	36	144	23	157
11	Col22	No	0	0	0	0	0	0
12	Col22	No	36	4	38	1	37	2.5
13	Col22	Yes	35	9	23	157	29	83
14	Col22	No	35	16	0	0	17.5	8
15	Col22	No	0	0	0	0	0	0
16	Col22	No	7	3	91	2	49	2.5
17	Col22	No	5	1	86	1	45.5	1
18	Col22	No	136	1	29	1	82.5	1
19	Col22	No	0	0	75	1	37.5	0.5
20	Col20	No	113	1	135	1	124	1
21	Col20	Yes	6	8	7	2	6.5	5
22	Col20	Yes	11	172	19	161	15	166.5
23	Col20	No	6	9	31	2	18.5	5.5
24	Col20	No	16	3	0	0	8	1.5
25	Col20	Yes	4	2	0	1	2	1.5
26	Col20	No	8	1	13	2	10.5	1.5
27	Col20	Yes	69	111	35	145	52	128
28	Col20	Yes	6	2	7	8	6.5	5
29	Col20	No	34	5	19	2	26.5	3.5
30	Col20	No	22	3	7	3	14.5	3
31	Col20	Yes	140	1	120	21	130	11
32	Col20	Yes	9	6	20	3	14.5	4.5
33	Col20	No	161	1	20	1	90.5	1
34	Col20	No	29	1	0	0	14.5	0.5
35	Col20	No	148	1	123	1	135.5	1
36	Col20	No	0	0	96	1	48	0.5
37	Col20	No	9	2	0	0	4.5	1
38	Col20	No	0	0	0	0	0	0
39	Col19	No	90	1	0	0	45	0.5
40	Col19	No	0	0	0	0	0	0
41	Col19	No	20	2	0	0	10	1
42	Col19	No	53	2	0	2	26.5	2
43	Col19	Yes	20	2	43	3	31.5	2.5
44	Col19	Yes	1	5	48	4	24.5	4.5
45	Col19	No	25	3	3	5	14	4
46	Col19	No	11	5	0	0	5.5	2.5
47	Col19	Yes	14	166	15	9	14.5	87.5
48	Col19	Yes	27	10	28	5	27.5	7.5
49	Col19	Yes	12	8	32	41	22	24.5
50	Col19	No	15	5	69	1	42	3
51	Col19	No	20	3	0	0	10	1.5
52	Col19	Yes	38	1	23	157	30.5	79
53	Col19	No	0	0	0	0	0	0
54	Col19	No	8	6	0	0	4	3
55	Col19	No	0	0	0	0	0	0
56	Col19	No	52	1	90	1	71	1
57	Col19	No	6	1	10	2	8	1.5
58	Col19	No	67	2	0	1	33.5	1.5
59	Col5	No	8	2	130	1	69	1.5
60	Col5	No	39	2	20	9	29.5	5.5
61	Col5	Yes	126	9	16	4	71	6.5
62	Col5	No	15	5	59	4	37	4.5
63	Col5	No	0	0	101	2	50.5	1
64	Col5	Yes	15	6	0	0	7.5	3
65	Col5	No	31	3	0	0	15.5	1.5
66	Col5	Yes	49	131	42	2	45.5	66.5
67	Col5	Yes	26	6	8	15	17	10.5
68	Col5	No	33	3	41	4	37	3.5
69	Col5	Yes	5	5	57	5	31	5
70	Col5	Yes	6	1	10	4	8	2.5
71	Col5	No	32	9	159	1	95.5	5
72	Col5	No	0	0	20	3	10	1.5
73	Col5	No	68	1	0	0	34	0.5
74	Col5	No	12	4	0	0	6	2
75	Col5	No	12	2	18	1	15	1.5
76	Col5	No	0	0	0	0	0	0
77	Col14	No	5	2	0	0	2.5	1
78	Col14	No	15	12	7	1	11	6.5
79	Col14	Yes	10	6	0	0	5	3
80	Col14	Yes	88	1	150	4	119	2.5
81	Col14	No	23	2	14	4	18.5	3
82	Col14	No	12	3	33	1	22.5	2
83	Col14	Yes	61	5	11	3	36	4
84	Col14	No	58	5	12	5	35	5
85	Col14	No	13	6	30	2	21.5	4
86	Col14	No	8	8	107	4	57.5	6
87	Col14	No	19	3	35	2	27	2.5
88	Col14	No	10	4	10	9	10	6.5
89	Col14	Yes	1	2	148	1	74.5	1.5
90	Col14	Yes	7	5	14	3	10.5	4
91	Col14	No	40	1	34	1	37	1
92	Col14	No	56	1	30	1	43	1
93	Col14	No	85	1	0	0	42.5	0.5
94	Col14	Yes	0	0	23	1	11.5	0.5
95	Col14	No	0	0	61	1	30.5	0.5
96	Col21	No	9	2	7	1	8	1.5
97	Col21	Yes	10	4	8	7	9	5.5
98	Col21	Yes	25	8	52	4	38.5	6
99	Col21	Yes	9	2	18	2	13.5	2
100	Col21	No	5	6	82	2	43.5	4
101	Col21	Yes	22	9	10	3	16	6
102	Col21	Yes	52	4	44	3	48	3.5
103	Col21	No	0	0	0	0	0	0
104	Col21	No	176	1	10	3	93	2
105	Col21	Yes	19	3	8	13	13.5	8
106	Col21	Yes	5	4	6	1	5.5	2.5
107	Col21	No	10	4	65	2	37.5	3
108	Col21	Yes	12	5	2	6	7	5.5
109	Col21	No	0	0	0	0	0	0
110	Col21	No	8	6	0	3	4	4.5
111	Col21	No	13	1	12	1	12.5	1
112	Col21	No	15	1	13	1	14	1
113	Col21	No	0	0	9	1	4.5	0.5
114	Col21	Yes	27	2	0	0	13.5	1
115	Col21	No	52	1	0	0	26	0.5
116	Col4	Yes	7	18	43	20	25	19
117	Col4	Yes	54	79	71	83	62.5	81
118	Col4	Yes	162	11	10	6	86	8.5
119	Col4	No	79	5	65	2	72	3.5
120	Col4	Yes	53	2	49	4	51	3
121	Col4	Yes	15	4	41	2	28	3
122	Col4	No	9	1	10	2	9.5	1.5
123	Col4	Yes	6	7	7	19	6.5	13
124	Col4	Yes	9	171	16	164	12.5	167.5
125	Col4	No	56	5	66	1	61	3
126	Col4	No	10	10	1	30	5.5	20
127	Col4	Yes	17	4	15	22	16	13
128	Col4	No	23	5	25	4	24	4.5
129	Col4	Yes	6	174	110	70	58	122
130	Col4	No	0	0	62	1	31	0.5
131	Col4	No	32	1	0	0	16	0.5
132	Col4	No	130	1	0	0	65	0.5
133	Col4	No	0	0	0	0	0	0
134	Col4	No	0	0	0	0	0	0
135	Col17	Yes	55	1	15	1	35	1
136	Col17	No	115	1	92	2	103.5	1.5
137	Col17	No	120	2	156	1	138	1.5
138	Col17	Yes	48	7	52	143	50	75
139	Col17	No	31	2	38	1	34.5	1.5
140	Col17	No	10	170	13	167	11.5	168.5
141	Col17	No	3	2	0	0	1.5	1
142	Col17	Yes	18	15	22	2	20	8.5
143	Col17	No	17	3	52	15	34.5	9
144	Col17	No	28	10	32	2	30	6
145	Col17	No	70	3	70	6	70	4.5
146	Col17	Yes	32	148	21	159	26.5	153.5
147	Col17	Yes	52	128	6	4	29	66
148	Col17	Yes	13	9	20	5	16.5	7
149	Col17	Yes	131	11	27	153	79	82
150	Col17	No	147	1	124	1	135.5	1
151	Col17	No	0	0	0	0	0	0
152	Col17	No	0	0	0	0	0	0
153	Col17	No	0	0	162	1	81	0.5
154	Col17	No	0	0	0	0	0	0

## Sheet: Tool_transport_between_trials
ColID	NrTrial	FirsttoBait	TotTime	Nr.Work
Col14	1	27	269	1		The characteristics of the tool transport to the bait during different trials (up to 4 trials)
Col14	2	53	524	1
Col14	3	102	1019	2		Column C: Latency (seconds) to drop the first tool into the bait
Col17	1	21	207	1		D: Total time (seconds) of tool transport
Col17	2	60	599	1		E: Number of workers involved in tool use
Col17	3	36	358	2
Col17	4	22	219	1
Col19	1	54	539	2
Col19	4	30	303	1
Col20	1	35	348	1
Col20	2	26	265	1
Col20	3	78	778	1
Col20	4	54	540	1
Col21	1	22	222	1
Col21	2	24	236	1
Col21	3	42	417	1
Col21	4	56	562	2
Col22	1	48	480	1
Col22	2	71	709	1
Col22	3	48	482	1
Col22	4	16	164	2
Col4	1	72	721	1
Col4	2	35	350	1
Col4	3	33	330	1
Col4	4	23	228	1
Col5	1	53	531	3
Col5	2	30	304	1
Col5	3	23	286	1

## Sheet: Contact_with_tools
Colony ID	Trial number	First tool to bait (sec)	Number workers before tool user
Col14	1	1711	0		Subset of 21 trials
Col14	4	1503	5
Col14	5	560	6		Column C: Latency (seconds) to drop the first tool into the bait
Col14	8	114	6		D: Number of workers that contacted the tools before the first tool user picked up the first tool
Col21	1	1515	7		0 = zero workers, i.e. the tool user contated the tools first
Col21	2	1896	8
Col21	3	195	4
Col21	4	450	4
Col21	8	109	5
Col4	1	856	8
Col4	2	35	0
Col4	3	990	6
Col4	4	26	1
Col4	5	1958	1
Col4	8	694	4
Col17	1	803	6
Col17	2	1987	0
Col17	3	342	0
Col17	4	445	0
Col17	7	1905	5
Col17	8	695	3
