# Supplementary material for: A small number of workers with specific personality traits perform tool use in ants
Source: eLife. 2020 Dec 9;9:e61298. doi: 10.7554/eLife.61298 (PMC7725502; doi:10.7554/eLife.61298)
Supplement: Supplementary file 1. [file elife-61298-supp1.xlsx]

## Sheet: Observed data
					1 = tool user; 0 =non-tool user; 136 tool use assignments			average N of tool users per subcolony			calculations, no data entry here; 1=yes(individual is a tool user, at least once); 0=individual is not a tool user
Line.NR	Colony	Subcolony	Trial	ID.ant	Tool.users		mean	8.25		individual.tool.users_N.repeated.events	individual.tool.users_yes.no	N tool users per subcolony
1	2	1	1	A.1	1		alpha	0.05		1	1	14
2	2	1	1	A.2	1		SD	3.13913		1	1
3	2	1	1	A.3	1		N	12		2	1
4	2	1	1	A.4	1		CI95%	1.7761		1	1
5	2	1	1	A.5	0		lower limit	6.4739		1	1
6	2	1	1	A.6	0		upper limit	10.0261		1	1
7	2	1	1	A.7	0					1	1
8	2	1	1	A.8	0					1	1
9	2	1	1	A.9	0					2	1
10	2	1	1	A.10	0					1	1
11	2	1	1	A.11	0					1	1
12	2	1	1	A.12	0					2	1
13	2	1	1	A.13	0					1	1
14	2	1	1	A.14	0					1	1
15	2	1	1	A.15	0					0	0
16	2	1	1	A.16	0					0	0
17	2	1	1	A.17	0					0	0
18	2	1	1	A.18	0					0	0
19	2	1	1	A.19	0					0	0
20	2	1	1	A.20	0					0	0
21	2	1	1	A.21	0					0	0
22	2	1	1	A.22	0					0	0
23	2	1	1	A.23	0					0	0
24	2	1	1	A.24	0					0	0
25	2	1	1	A.25	0					0	0
26	2	1	1	A.26	0					0	0
27	2	1	1	A.27	0					0	0
28	2	1	1	A.28	0					0	0
29	2	1	1	A.29	0					0	0
30	2	1	1	A.30	0					0	0
31	2	1	1	A.31	0					0	0
32	2	1	1	A.32	0					0	0
33	2	1	1	A.33	0					0	0
34	2	1	1	A.34	0					0	0
35	2	1	1	A.35	0					0	0
36	2	1	1	A.36	0					0	0
37	2	1	1	A.37	0					0	0
38	2	1	1	A.38	0					0	0
39	2	1	1	A.39	0					0	0
40	2	1	1	A.40	0					0	0
41	2	1	2	A.1	0
42	2	1	2	A.2	0
43	2	1	2	A.3	0
44	2	1	2	A.4	0
45	2	1	2	A.5	1
46	2	1	2	A.6	1
47	2	1	2	A.7	1
48	2	1	2	A.8	0
49	2	1	2	A.9	0
50	2	1	2	A.10	0
51	2	1	2	A.11	0
52	2	1	2	A.12	0
53	2	1	2	A.13	0
54	2	1	2	A.14	0
55	2	1	2	A.15	0
56	2	1	2	A.16	0
57	2	1	2	A.17	0
58	2	1	2	A.18	0
59	2	1	2	A.19	0
60	2	1	2	A.20	0
61	2	1	2	A.21	0
62	2	1	2	A.22	0
63	2	1	2	A.23	0
64	2	1	2	A.24	0
65	2	1	2	A.25	0
66	2	1	2	A.26	0
67	2	1	2	A.27	0
68	2	1	2	A.28	0
69	2	1	2	A.29	0
70	2	1	2	A.30	0
71	2	1	2	A.31	0
72	2	1	2	A.32	0
73	2	1	2	A.33	0
74	2	1	2	A.34	0
75	2	1	2	A.35	0
76	2	1	2	A.36	0
77	2	1	2	A.37	0
78	2	1	2	A.38	0
79	2	1	2	A.39	0
80	2	1	2	A.40	0
81	2	1	3	A.1	0
82	2	1	3	A.2	0
83	2	1	3	A.3	0
84	2	1	3	A.4	0
85	2	1	3	A.5	0
86	2	1	3	A.6	0
87	2	1	3	A.7	0
88	2	1	3	A.8	1
89	2	1	3	A.9	1
90	2	1	3	A.10	1
91	2	1	3	A.11	1
92	2	1	3	A.12	1
93	2	1	3	A.13	0
94	2	1	3	A.14	0
95	2	1	3	A.15	0
96	2	1	3	A.16	0
97	2	1	3	A.17	0
98	2	1	3	A.18	0
99	2	1	3	A.19	0
100	2	1	3	A.20	0
101	2	1	3	A.21	0
102	2	1	3	A.22	0
103	2	1	3	A.23	0
104	2	1	3	A.24	0
105	2	1	3	A.25	0
106	2	1	3	A.26	0
107	2	1	3	A.27	0
108	2	1	3	A.28	0
109	2	1	3	A.29	0
110	2	1	3	A.30	0
111	2	1	3	A.31	0
112	2	1	3	A.32	0
113	2	1	3	A.33	0
114	2	1	3	A.34	0
115	2	1	3	A.35	0
116	2	1	3	A.36	0
117	2	1	3	A.37	0
118	2	1	3	A.38	0
119	2	1	3	A.39	0
120	2	1	3	A.40	0
121	2	1	4	A.1	0
122	2	1	4	A.2	0
123	2	1	4	A.3	1
124	2	1	4	A.4	0
125	2	1	4	A.5	0
126	2	1	4	A.6	0
127	2	1	4	A.7	0
128	2	1	4	A.8	0
129	2	1	4	A.9	1
130	2	1	4	A.10	0
131	2	1	4	A.11	0
132	2	1	4	A.12	1
133	2	1	4	A.13	1
134	2	1	4	A.14	1
135	2	1	4	A.15	0
136	2	1	4	A.16	0
137	2	1	4	A.17	0
138	2	1	4	A.18	0
139	2	1	4	A.19	0
140	2	1	4	A.20	0
141	2	1	4	A.21	0
142	2	1	4	A.22	0
143	2	1	4	A.23	0
144	2	1	4	A.24	0
145	2	1	4	A.25	0
146	2	1	4	A.26	0
147	2	1	4	A.27	0
148	2	1	4	A.28	0
149	2	1	4	A.29	0
150	2	1	4	A.30	0
151	2	1	4	A.31	0
152	2	1	4	A.32	0
153	2	1	4	A.33	0
154	2	1	4	A.34	0
155	2	1	4	A.35	0
156	2	1	4	A.36	0
157	2	1	4	A.37	0
158	2	1	4	A.38	0
159	2	1	4	A.39	0
160	2	1	4	A.40	0
161	2	2	1	B.1	1					3	1	6
162	2	2	1	B.2	0					1	1
163	2	2	1	B.3	0					1	1
164	2	2	1	B.4	0					1	1
165	2	2	1	B.5	0					1	1
166	2	2	1	B.6	0					1	1
167	2	2	1	B.7	0					0	0
168	2	2	1	B.8	0					0	0
169	2	2	1	B.9	0					0	0
170	2	2	1	B.10	0					0	0
171	2	2	1	B.11	0					0	0
172	2	2	1	B.12	0					0	0
173	2	2	1	B.13	0					0	0
174	2	2	1	B.14	0					0	0
175	2	2	1	B.15	0					0	0
176	2	2	1	B.16	0					0	0
177	2	2	1	B.17	0					0	0
178	2	2	1	B.18	0					0	0
179	2	2	1	B.19	0					0	0
180	2	2	1	B.20	0					0	0
181	2	2	1	B.21	0					0	0
182	2	2	1	B.22	0					0	0
183	2	2	1	B.23	0					0	0
184	2	2	1	B.24	0					0	0
185	2	2	1	B.25	0					0	0
186	2	2	1	B.26	0					0	0
187	2	2	1	B.27	0					0	0
188	2	2	1	B.28	0					0	0
189	2	2	1	B.29	0					0	0
190	2	2	1	B.30	0					0	0
191	2	2	1	B.31	0					0	0
192	2	2	1	B.32	0					0	0
193	2	2	1	B.33	0					0	0
194	2	2	1	B.34	0					0	0
195	2	2	1	B.35	0					0	0
196	2	2	1	B.36	0					0	0
197	2	2	1	B.37	0					0	0
198	2	2	1	B.38	0					0	0
199	2	2	1	B.39	0					0	0
200	2	2	1	B.40	0					0	0
201	2	2	2	B.1	1
202	2	2	2	B.2	1
203	2	2	2	B.3	0
204	2	2	2	B.4	0
205	2	2	2	B.5	0
206	2	2	2	B.6	0
207	2	2	2	B.7	0
208	2	2	2	B.8	0
209	2	2	2	B.9	0
210	2	2	2	B.10	0
211	2	2	2	B.11	0
212	2	2	2	B.12	0
213	2	2	2	B.13	0
214	2	2	2	B.14	0
215	2	2	2	B.15	0
216	2	2	2	B.16	0
217	2	2	2	B.17	0
218	2	2	2	B.18	0
219	2	2	2	B.19	0
220	2	2	2	B.20	0
221	2	2	2	B.21	0
222	2	2	2	B.22	0
223	2	2	2	B.23	0
224	2	2	2	B.24	0
225	2	2	2	B.25	0
226	2	2	2	B.26	0
227	2	2	2	B.27	0
228	2	2	2	B.28	0
229	2	2	2	B.29	0
230	2	2	2	B.30	0
231	2	2	2	B.31	0
232	2	2	2	B.32	0
233	2	2	2	B.33	0
234	2	2	2	B.34	0
235	2	2	2	B.35	0
236	2	2	2	B.36	0
237	2	2	2	B.37	0
238	2	2	2	B.38	0
239	2	2	2	B.39	0
240	2	2	2	B.40	0
241	2	2	3	B.1	0
242	2	2	3	B.2	0
243	2	2	3	B.3	1
244	2	2	3	B.4	1
245	2	2	3	B.5	0
246	2	2	3	B.6	0
247	2	2	3	B.7	0
248	2	2	3	B.8	0
249	2	2	3	B.9	0
250	2	2	3	B.10	0
251	2	2	3	B.11	0
252	2	2	3	B.12	0
253	2	2	3	B.13	0
254	2	2	3	B.14	0
255	2	2	3	B.15	0
256	2	2	3	B.16	0
257	2	2	3	B.17	0
258	2	2	3	B.18	0
259	2	2	3	B.19	0
260	2	2	3	B.20	0
261	2	2	3	B.21	0
262	2	2	3	B.22	0
263	2	2	3	B.23	0
264	2	2	3	B.24	0
265	2	2	3	B.25	0
266	2	2	3	B.26	0
267	2	2	3	B.27	0
268	2	2	3	B.28	0
269	2	2	3	B.29	0
270	2	2	3	B.30	0
271	2	2	3	B.31	0
272	2	2	3	B.32	0
273	2	2	3	B.33	0
274	2	2	3	B.34	0
275	2	2	3	B.35	0
276	2	2	3	B.36	0
277	2	2	3	B.37	0
278	2	2	3	B.38	0
279	2	2	3	B.39	0
280	2	2	3	B.40	0
281	2	2	4	B.1	1
282	2	2	4	B.2	0
283	2	2	4	B.3	0
284	2	2	4	B.4	0
285	2	2	4	B.5	1
286	2	2	4	B.6	1
287	2	2	4	B.7	0
288	2	2	4	B.8	0
289	2	2	4	B.9	0
290	2	2	4	B.10	0
291	2	2	4	B.11	0
292	2	2	4	B.12	0
293	2	2	4	B.13	0
294	2	2	4	B.14	0
295	2	2	4	B.15	0
296	2	2	4	B.16	0
297	2	2	4	B.17	0
298	2	2	4	B.18	0
299	2	2	4	B.19	0
300	2	2	4	B.20	0
301	2	2	4	B.21	0
302	2	2	4	B.22	0
303	2	2	4	B.23	0
304	2	2	4	B.24	0
305	2	2	4	B.25	0
306	2	2	4	B.26	0
307	2	2	4	B.27	0
308	2	2	4	B.28	0
309	2	2	4	B.29	0
310	2	2	4	B.30	0
311	2	2	4	B.31	0
312	2	2	4	B.32	0
313	2	2	4	B.33	0
314	2	2	4	B.34	0
315	2	2	4	B.35	0
316	2	2	4	B.36	0
317	2	2	4	B.37	0
318	2	2	4	B.38	0
319	2	2	4	B.39	0
320	2	2	4	B.40	0
321	19	1	1	C.1	1					1	1	11
322	19	1	1	C.2	1					1	1
323	19	1	1	C.3	1					2	1
324	19	1	1	C.4	1					1	1
325	19	1	1	C.5	1					1	1
326	19	1	1	C.6	0					1	1
327	19	1	1	C.7	0					1	1
328	19	1	1	C.8	0					2	1
329	19	1	1	C.9	0					1	1
330	19	1	1	C.10	0					1	1
331	19	1	1	C.11	0					1	1
332	19	1	1	C.12	0					0	0
333	19	1	1	C.13	0					0	0
334	19	1	1	C.14	0					0	0
335	19	1	1	C.15	0					0	0
336	19	1	1	C.16	0					0	0
337	19	1	1	C.17	0					0	0
338	19	1	1	C.18	0					0	0
339	19	1	1	C.19	0					0	0
340	19	1	1	C.20	0					0	0
341	19	1	1	C.21	0					0	0
342	19	1	1	C.22	0					0	0
343	19	1	1	C.23	0					0	0
344	19	1	1	C.24	0					0	0
345	19	1	1	C.25	0					0	0
346	19	1	1	C.26	0					0	0
347	19	1	1	C.27	0					0	0
348	19	1	1	C.28	0					0	0
349	19	1	1	C.29	0					0	0
350	19	1	1	C.30	0					0	0
351	19	1	1	C.31	0					0	0
352	19	1	1	C.32	0					0	0
353	19	1	1	C.33	0					0	0
354	19	1	1	C.34	0					0	0
355	19	1	1	C.35	0					0	0
356	19	1	1	C.36	0					0	0
357	19	1	1	C.37	0					0	0
358	19	1	1	C.38	0					0	0
359	19	1	1	C.39	0					0	0
360	19	1	1	C.40	0					0	0
361	19	1	2	C.1	0
362	19	1	2	C.2	0
363	19	1	2	C.3	0
364	19	1	2	C.4	0
365	19	1	2	C.5	0
366	19	1	2	C.6	1
367	19	1	2	C.7	1
368	19	1	2	C.8	1
369	19	1	2	C.9	1
370	19	1	2	C.10	0
371	19	1	2	C.11	0
372	19	1	2	C.12	0
373	19	1	2	C.13	0
374	19	1	2	C.14	0
375	19	1	2	C.15	0
376	19	1	2	C.16	0
377	19	1	2	C.17	0
378	19	1	2	C.18	0
379	19	1	2	C.19	0
380	19	1	2	C.20	0
381	19	1	2	C.21	0
382	19	1	2	C.22	0
383	19	1	2	C.23	0
384	19	1	2	C.24	0
385	19	1	2	C.25	0
386	19	1	2	C.26	0
387	19	1	2	C.27	0
388	19	1	2	C.28	0
389	19	1	2	C.29	0
390	19	1	2	C.30	0
391	19	1	2	C.31	0
392	19	1	2	C.32	0
393	19	1	2	C.33	0
394	19	1	2	C.34	0
395	19	1	2	C.35	0
396	19	1	2	C.36	0
397	19	1	2	C.37	0
398	19	1	2	C.38	0
399	19	1	2	C.39	0
400	19	1	2	C.40	0
401	19	1	3	C.1	0
402	19	1	3	C.2	0
403	19	1	3	C.3	0
404	19	1	3	C.4	0
405	19	1	3	C.5	0
406	19	1	3	C.6	0
407	19	1	3	C.7	0
408	19	1	3	C.8	1
409	19	1	3	C.9	0
410	19	1	3	C.10	1
411	19	1	3	C.11	1
412	19	1	3	C.12	0
413	19	1	3	C.13	0
414	19	1	3	C.14	0
415	19	1	3	C.15	0
416	19	1	3	C.16	0
417	19	1	3	C.17	0
418	19	1	3	C.18	0
419	19	1	3	C.19	0
420	19	1	3	C.20	0
421	19	1	3	C.21	0
422	19	1	3	C.22	0
423	19	1	3	C.23	0
424	19	1	3	C.24	0
425	19	1	3	C.25	0
426	19	1	3	C.26	0
427	19	1	3	C.27	0
428	19	1	3	C.28	0
429	19	1	3	C.29	0
430	19	1	3	C.30	0
431	19	1	3	C.31	0
432	19	1	3	C.32	0
433	19	1	3	C.33	0
434	19	1	3	C.34	0
435	19	1	3	C.35	0
436	19	1	3	C.36	0
437	19	1	3	C.37	0
438	19	1	3	C.38	0
439	19	1	3	C.39	0
440	19	1	3	C.40	0
441	19	1	4	C.1	0
442	19	1	4	C.2	0
443	19	1	4	C.3	1
444	19	1	4	C.4	0
445	19	1	4	C.5	0
446	19	1	4	C.6	0
447	19	1	4	C.7	0
448	19	1	4	C.8	0
449	19	1	4	C.9	0
450	19	1	4	C.10	0
451	19	1	4	C.11	0
452	19	1	4	C.12	0
453	19	1	4	C.13	0
454	19	1	4	C.14	0
455	19	1	4	C.15	0
456	19	1	4	C.16	0
457	19	1	4	C.17	0
458	19	1	4	C.18	0
459	19	1	4	C.19	0
460	19	1	4	C.20	0
461	19	1	4	C.21	0
462	19	1	4	C.22	0
463	19	1	4	C.23	0
464	19	1	4	C.24	0
465	19	1	4	C.25	0
466	19	1	4	C.26	0
467	19	1	4	C.27	0
468	19	1	4	C.28	0
469	19	1	4	C.29	0
470	19	1	4	C.30	0
471	19	1	4	C.31	0
472	19	1	4	C.32	0
473	19	1	4	C.33	0
474	19	1	4	C.34	0
475	19	1	4	C.35	0
476	19	1	4	C.36	0
477	19	1	4	C.37	0
478	19	1	4	C.38	0
479	19	1	4	C.39	0
480	19	1	4	C.40	0
481	19	2	1	D.1	1					1	1	10
482	19	2	1	D.2	1					1	1
483	19	2	1	D.3	1					2	1
484	19	2	1	D.4	1					2	1
485	19	2	1	D.5	0					1	1
486	19	2	1	D.6	0					2	1
487	19	2	1	D.7	0					1	1
488	19	2	1	D.8	0					2	1
489	19	2	1	D.9	0					1	1
490	19	2	1	D.10	0					1	1
491	19	2	1	D.11	0					0	0
492	19	2	1	D.12	0					0	0
493	19	2	1	D.13	0					0	0
494	19	2	1	D.14	0					0	0
495	19	2	1	D.15	0					0	0
496	19	2	1	D.16	0					0	0
497	19	2	1	D.17	0					0	0
498	19	2	1	D.18	0					0	0
499	19	2	1	D.19	0					0	0
500	19	2	1	D.20	0					0	0
501	19	2	1	D.21	0					0	0
502	19	2	1	D.22	0					0	0
503	19	2	1	D.23	0					0	0
504	19	2	1	D.24	0					0	0
505	19	2	1	D.25	0					0	0
506	19	2	1	D.26	0					0	0
507	19	2	1	D.27	0					0	0
508	19	2	1	D.28	0					0	0
509	19	2	1	D.29	0					0	0
510	19	2	1	D.30	0					0	0
511	19	2	1	D.31	0					0	0
512	19	2	1	D.32	0					0	0
513	19	2	1	D.33	0					0	0
514	19	2	1	D.34	0					0	0
515	19	2	1	D.35	0					0	0
516	19	2	1	D.36	0					0	0
517	19	2	1	D.37	0					0	0
518	19	2	1	D.38	0					0	0
519	19	2	1	D.39	0					0	0
520	19	2	1	D.40	0					0	0
521	19	2	2	D.1	0
522	19	2	2	D.2	0
523	19	2	2	D.3	0
524	19	2	2	D.4	1
525	19	2	2	D.5	1
526	19	2	2	D.6	0
527	19	2	2	D.7	0
528	19	2	2	D.8	0
529	19	2	2	D.9	0
530	19	2	2	D.10	0
531	19	2	2	D.11	0
532	19	2	2	D.12	0
533	19	2	2	D.13	0
534	19	2	2	D.14	0
535	19	2	2	D.15	0
536	19	2	2	D.16	0
537	19	2	2	D.17	0
538	19	2	2	D.18	0
539	19	2	2	D.19	0
540	19	2	2	D.20	0
541	19	2	2	D.21	0
542	19	2	2	D.22	0
543	19	2	2	D.23	0
544	19	2	2	D.24	0
545	19	2	2	D.25	0
546	19	2	2	D.26	0
547	19	2	2	D.27	0
548	19	2	2	D.28	0
549	19	2	2	D.29	0
550	19	2	2	D.30	0
551	19	2	2	D.31	0
552	19	2	2	D.32	0
553	19	2	2	D.33	0
554	19	2	2	D.34	0
555	19	2	2	D.35	0
556	19	2	2	D.36	0
557	19	2	2	D.37	0
558	19	2	2	D.38	0
559	19	2	2	D.39	0
560	19	2	2	D.40	0
561	19	2	3	D.1	0
562	19	2	3	D.2	0
563	19	2	3	D.3	1
564	19	2	3	D.4	0
565	19	2	3	D.5	0
566	19	2	3	D.6	1
567	19	2	3	D.7	1
568	19	2	3	D.8	1
569	19	2	3	D.9	0
570	19	2	3	D.10	0
571	19	2	3	D.11	0
572	19	2	3	D.12	0
573	19	2	3	D.13	0
574	19	2	3	D.14	0
575	19	2	3	D.15	0
576	19	2	3	D.16	0
577	19	2	3	D.17	0
578	19	2	3	D.18	0
579	19	2	3	D.19	0
580	19	2	3	D.20	0
581	19	2	3	D.21	0
582	19	2	3	D.22	0
583	19	2	3	D.23	0
584	19	2	3	D.24	0
585	19	2	3	D.25	0
586	19	2	3	D.26	0
587	19	2	3	D.27	0
588	19	2	3	D.28	0
589	19	2	3	D.29	0
590	19	2	3	D.30	0
591	19	2	3	D.31	0
592	19	2	3	D.32	0
593	19	2	3	D.33	0
594	19	2	3	D.34	0
595	19	2	3	D.35	0
596	19	2	3	D.36	0
597	19	2	3	D.37	0
598	19	2	3	D.38	0
599	19	2	3	D.39	0
600	19	2	3	D.40	0
601	19	2	4	D.1	0
602	19	2	4	D.2	0
603	19	2	4	D.3	0
604	19	2	4	D.4	0
605	19	2	4	D.5	0
606	19	2	4	D.6	1
607	19	2	4	D.7	0
608	19	2	4	D.8	1
609	19	2	4	D.9	1
610	19	2	4	D.10	1
611	19	2	4	D.11	0
612	19	2	4	D.12	0
613	19	2	4	D.13	0
614	19	2	4	D.14	0
615	19	2	4	D.15	0
616	19	2	4	D.16	0
617	19	2	4	D.17	0
618	19	2	4	D.18	0
619	19	2	4	D.19	0
620	19	2	4	D.20	0
621	19	2	4	D.21	0
622	19	2	4	D.22	0
623	19	2	4	D.23	0
624	19	2	4	D.24	0
625	19	2	4	D.25	0
626	19	2	4	D.26	0
627	19	2	4	D.27	0
628	19	2	4	D.28	0
629	19	2	4	D.29	0
630	19	2	4	D.30	0
631	19	2	4	D.31	0
632	19	2	4	D.32	0
633	19	2	4	D.33	0
634	19	2	4	D.34	0
635	19	2	4	D.35	0
636	19	2	4	D.36	0
637	19	2	4	D.37	0
638	19	2	4	D.38	0
639	19	2	4	D.39	0
640	19	2	4	D.40	0
641	17	1	1	E.1	1					2	1	6
642	17	1	1	E.2	1					2	1
643	17	1	1	E.3	1					2	1
644	17	1	1	E.4	1					2	1
645	17	1	1	E.5	1					2	1
646	17	1	1	E.6	0					1	1
647	17	1	1	E.7	0					0	0
648	17	1	1	E.8	0					0	0
649	17	1	1	E.9	0					0	0
650	17	1	1	E.10	0					0	0
651	17	1	1	E.11	0					0	0
652	17	1	1	E.12	0					0	0
653	17	1	1	E.13	0					0	0
654	17	1	1	E.14	0					0	0
655	17	1	1	E.15	0					0	0
656	17	1	1	E.16	0					0	0
657	17	1	1	E.17	0					0	0
658	17	1	1	E.18	0					0	0
659	17	1	1	E.19	0					0	0
660	17	1	1	E.20	0					0	0
661	17	1	1	E.21	0					0	0
662	17	1	1	E.22	0					0	0
663	17	1	1	E.23	0					0	0
664	17	1	1	E.24	0					0	0
665	17	1	1	E.25	0					0	0
666	17	1	1	E.26	0					0	0
667	17	1	1	E.27	0					0	0
668	17	1	1	E.28	0					0	0
669	17	1	1	E.29	0					0	0
670	17	1	1	E.30	0					0	0
671	17	1	1	E.31	0					0	0
672	17	1	1	E.32	0					0	0
673	17	1	1	E.33	0					0	0
674	17	1	1	E.34	0					0	0
675	17	1	1	E.35	0					0	0
676	17	1	1	E.36	0					0	0
677	17	1	1	E.37	0					0	0
678	17	1	1	E.38	0					0	0
679	17	1	1	E.39	0					0	0
680	17	1	1	E.40	0					0	0
681	17	1	2	E.1	1
682	17	1	2	E.2	1
683	17	1	2	E.3	0
684	17	1	2	E.4	0
685	17	1	2	E.5	0
686	17	1	2	E.6	0
687	17	1	2	E.7	0
688	17	1	2	E.8	0
689	17	1	2	E.9	0
690	17	1	2	E.10	0
691	17	1	2	E.11	0
692	17	1	2	E.12	0
693	17	1	2	E.13	0
694	17	1	2	E.14	0
695	17	1	2	E.15	0
696	17	1	2	E.16	0
697	17	1	2	E.17	0
698	17	1	2	E.18	0
699	17	1	2	E.19	0
700	17	1	2	E.20	0
701	17	1	2	E.21	0
702	17	1	2	E.22	0
703	17	1	2	E.23	0
704	17	1	2	E.24	0
705	17	1	2	E.25	0
706	17	1	2	E.26	0
707	17	1	2	E.27	0
708	17	1	2	E.28	0
709	17	1	2	E.29	0
710	17	1	2	E.30	0
711	17	1	2	E.31	0
712	17	1	2	E.32	0
713	17	1	2	E.33	0
714	17	1	2	E.34	0
715	17	1	2	E.35	0
716	17	1	2	E.36	0
717	17	1	2	E.37	0
718	17	1	2	E.38	0
719	17	1	2	E.39	0
720	17	1	2	E.40	0
721	17	1	3	E.1	0
722	17	1	3	E.2	0
723	17	1	3	E.3	0
724	17	1	3	E.4	1
725	17	1	3	E.5	0
726	17	1	3	E.6	0
727	17	1	3	E.7	0
728	17	1	3	E.8	0
729	17	1	3	E.9	0
730	17	1	3	E.10	0
731	17	1	3	E.11	0
732	17	1	3	E.12	0
733	17	1	3	E.13	0
734	17	1	3	E.14	0
735	17	1	3	E.15	0
736	17	1	3	E.16	0
737	17	1	3	E.17	0
738	17	1	3	E.18	0
739	17	1	3	E.19	0
740	17	1	3	E.20	0
741	17	1	3	E.21	0
742	17	1	3	E.22	0
743	17	1	3	E.23	0
744	17	1	3	E.24	0
745	17	1	3	E.25	0
746	17	1	3	E.26	0
747	17	1	3	E.27	0
748	17	1	3	E.28	0
749	17	1	3	E.29	0
750	17	1	3	E.30	0
751	17	1	3	E.31	0
752	17	1	3	E.32	0
753	17	1	3	E.33	0
754	17	1	3	E.34	0
755	17	1	3	E.35	0
756	17	1	3	E.36	0
757	17	1	3	E.37	0
758	17	1	3	E.38	0
759	17	1	3	E.39	0
760	17	1	3	E.40	0
761	17	1	4	E.1	0
762	17	1	4	E.2	0
763	17	1	4	E.3	1
764	17	1	4	E.4	0
765	17	1	4	E.5	1
766	17	1	4	E.6	1
767	17	1	4	E.7	0
768	17	1	4	E.8	0
769	17	1	4	E.9	0
770	17	1	4	E.10	0
771	17	1	4	E.11	0
772	17	1	4	E.12	0
773	17	1	4	E.13	0
774	17	1	4	E.14	0
775	17	1	4	E.15	0
776	17	1	4	E.16	0
777	17	1	4	E.17	0
778	17	1	4	E.18	0
779	17	1	4	E.19	0
780	17	1	4	E.20	0
781	17	1	4	E.21	0
782	17	1	4	E.22	0
783	17	1	4	E.23	0
784	17	1	4	E.24	0
785	17	1	4	E.25	0
786	17	1	4	E.26	0
787	17	1	4	E.27	0
788	17	1	4	E.28	0
789	17	1	4	E.29	0
790	17	1	4	E.30	0
791	17	1	4	E.31	0
792	17	1	4	E.32	0
793	17	1	4	E.33	0
794	17	1	4	E.34	0
795	17	1	4	E.35	0
796	17	1	4	E.36	0
797	17	1	4	E.37	0
798	17	1	4	E.38	0
799	17	1	4	E.39	0
800	17	1	4	E.40	0
801	17	2	1	F.1	1					1	1	13
802	17	2	1	F.2	1					1	1
803	17	2	1	F.3	1					2	1
804	17	2	1	F.4	1					2	1
805	17	2	1	F.5	1					1	1
806	17	2	1	F.6	1					1	1
807	17	2	1	F.7	0					1	1
808	17	2	1	F.8	0					3	1
809	17	2	1	F.9	0					1	1
810	17	2	1	F.10	0					1	1
811	17	2	1	F.11	0					1	1
812	17	2	1	F.12	0					1	1
813	17	2	1	F.13	0					1	1
814	17	2	1	F.14	0					0	0
815	17	2	1	F.15	0					0	0
816	17	2	1	F.16	0					0	0
817	17	2	1	F.17	0					0	0
818	17	2	1	F.18	0					0	0
819	17	2	1	F.19	0					0	0
820	17	2	1	F.20	0					0	0
821	17	2	1	F.21	0					0	0
822	17	2	1	F.22	0					0	0
823	17	2	1	F.23	0					0	0
824	17	2	1	F.24	0					0	0
825	17	2	1	F.25	0					0	0
826	17	2	1	F.26	0					0	0
827	17	2	1	F.27	0					0	0
828	17	2	1	F.28	0					0	0
829	17	2	1	F.29	0					0	0
830	17	2	1	F.30	0					0	0
831	17	2	1	F.31	0					0	0
832	17	2	1	F.32	0					0	0
833	17	2	1	F.33	0					0	0
834	17	2	1	F.34	0					0	0
835	17	2	1	F.35	0					0	0
836	17	2	1	F.36	0					0	0
837	17	2	1	F.37	0					0	0
838	17	2	1	F.38	0					0	0
839	17	2	1	F.39	0					0	0
840	17	2	1	F.40	0					0	0
841	17	2	2	F.1	0
842	17	2	2	F.2	0
843	17	2	2	F.3	1
844	17	2	2	F.4	0
845	17	2	2	F.5	0
846	17	2	2	F.6	0
847	17	2	2	F.7	1
848	17	2	2	F.8	1
849	17	2	2	F.9	0
850	17	2	2	F.10	0
851	17	2	2	F.11	0
852	17	2	2	F.12	0
853	17	2	2	F.13	0
854	17	2	2	F.14	0
855	17	2	2	F.15	0
856	17	2	2	F.16	0
857	17	2	2	F.17	0
858	17	2	2	F.18	0
859	17	2	2	F.19	0
860	17	2	2	F.20	0
861	17	2	2	F.21	0
862	17	2	2	F.22	0
863	17	2	2	F.23	0
864	17	2	2	F.24	0
865	17	2	2	F.25	0
866	17	2	2	F.26	0
867	17	2	2	F.27	0
868	17	2	2	F.28	0
869	17	2	2	F.29	0
870	17	2	2	F.30	0
871	17	2	2	F.31	0
872	17	2	2	F.32	0
873	17	2	2	F.33	0
874	17	2	2	F.34	0
875	17	2	2	F.35	0
876	17	2	2	F.36	0
877	17	2	2	F.37	0
878	17	2	2	F.38	0
879	17	2	2	F.39	0
880	17	2	2	F.40	0
881	17	2	3	F.1	0
882	17	2	3	F.2	0
883	17	2	3	F.3	0
884	17	2	3	F.4	0
885	17	2	3	F.5	0
886	17	2	3	F.6	0
887	17	2	3	F.7	0
888	17	2	3	F.8	1
889	17	2	3	F.9	1
890	17	2	3	F.10	1
891	17	2	3	F.11	1
892	17	2	3	F.12	0
893	17	2	3	F.13	0
894	17	2	3	F.14	0
895	17	2	3	F.15	0
896	17	2	3	F.16	0
897	17	2	3	F.17	0
898	17	2	3	F.18	0
899	17	2	3	F.19	0
900	17	2	3	F.20	0
901	17	2	3	F.21	0
902	17	2	3	F.22	0
903	17	2	3	F.23	0
904	17	2	3	F.24	0
905	17	2	3	F.25	0
906	17	2	3	F.26	0
907	17	2	3	F.27	0
908	17	2	3	F.28	0
909	17	2	3	F.29	0
910	17	2	3	F.30	0
911	17	2	3	F.31	0
912	17	2	3	F.32	0
913	17	2	3	F.33	0
914	17	2	3	F.34	0
915	17	2	3	F.35	0
916	17	2	3	F.36	0
917	17	2	3	F.37	0
918	17	2	3	F.38	0
919	17	2	3	F.39	0
920	17	2	3	F.40	0
921	17	2	4	F.1	0
922	17	2	4	F.2	0
923	17	2	4	F.3	0
924	17	2	4	F.4	1
925	17	2	4	F.5	0
926	17	2	4	F.6	0
927	17	2	4	F.7	0
928	17	2	4	F.8	1
929	17	2	4	F.9	0
930	17	2	4	F.10	0
931	17	2	4	F.11	0
932	17	2	4	F.12	1
933	17	2	4	F.13	1
934	17	2	4	F.14	0
935	17	2	4	F.15	0
936	17	2	4	F.16	0
937	17	2	4	F.17	0
938	17	2	4	F.18	0
939	17	2	4	F.19	0
940	17	2	4	F.20	0
941	17	2	4	F.21	0
942	17	2	4	F.22	0
943	17	2	4	F.23	0
944	17	2	4	F.24	0
945	17	2	4	F.25	0
946	17	2	4	F.26	0
947	17	2	4	F.27	0
948	17	2	4	F.28	0
949	17	2	4	F.29	0
950	17	2	4	F.30	0
951	17	2	4	F.31	0
952	17	2	4	F.32	0
953	17	2	4	F.33	0
954	17	2	4	F.34	0
955	17	2	4	F.35	0
956	17	2	4	F.36	0
957	17	2	4	F.37	0
958	17	2	4	F.38	0
959	17	2	4	F.39	0
960	17	2	4	F.40	0
961	14	1	1	G.1	1					3	1	8
962	14	1	1	G.2	1					1	1
963	14	1	1	G.3	1					1	1
964	14	1	1	G.4	0					1	1
965	14	1	1	G.5	0					3	1
966	14	1	1	G.6	0					1	1
967	14	1	1	G.7	0					1	1
968	14	1	1	G.8	0					1	1
969	14	1	1	G.9	0					0	0
970	14	1	1	G.10	0					0	0
971	14	1	1	G.11	0					0	0
972	14	1	1	G.12	0					0	0
973	14	1	1	G.13	0					0	0
974	14	1	1	G.14	0					0	0
975	14	1	1	G.15	0					0	0
976	14	1	1	G.16	0					0	0
977	14	1	1	G.17	0					0	0
978	14	1	1	G.18	0					0	0
979	14	1	1	G.19	0					0	0
980	14	1	1	G.20	0					0	0
981	14	1	1	G.21	0					0	0
982	14	1	1	G.22	0					0	0
983	14	1	1	G.23	0					0	0
984	14	1	1	G.24	0					0	0
985	14	1	1	G.25	0					0	0
986	14	1	1	G.26	0					0	0
987	14	1	1	G.27	0					0	0
988	14	1	1	G.28	0					0	0
989	14	1	1	G.29	0					0	0
990	14	1	1	G.30	0					0	0
991	14	1	1	G.31	0					0	0
992	14	1	1	G.32	0					0	0
993	14	1	1	G.33	0					0	0
994	14	1	1	G.34	0					0	0
995	14	1	1	G.35	0					0	0
996	14	1	1	G.36	0					0	0
997	14	1	1	G.37	0					0	0
998	14	1	1	G.38	0					0	0
999	14	1	1	G.39	0					0	0
1000	14	1	1	G.40	0					0	0
1001	14	1	2	G.1	0
1002	14	1	2	G.2	0
1003	14	1	2	G.3	0
1004	14	1	2	G.4	1
1005	14	1	2	G.5	1
1006	14	1	2	G.6	0
1007	14	1	2	G.7	0
1008	14	1	2	G.8	0
1009	14	1	2	G.9	0
1010	14	1	2	G.10	0
1011	14	1	2	G.11	0
1012	14	1	2	G.12	0
1013	14	1	2	G.13	0
1014	14	1	2	G.14	0
1015	14	1	2	G.15	0
1016	14	1	2	G.16	0
1017	14	1	2	G.17	0
1018	14	1	2	G.18	0
1019	14	1	2	G.19	0
1020	14	1	2	G.20	0
1021	14	1	2	G.21	0
1022	14	1	2	G.22	0
1023	14	1	2	G.23	0
1024	14	1	2	G.24	0
1025	14	1	2	G.25	0
1026	14	1	2	G.26	0
1027	14	1	2	G.27	0
1028	14	1	2	G.28	0
1029	14	1	2	G.29	0
1030	14	1	2	G.30	0
1031	14	1	2	G.31	0
1032	14	1	2	G.32	0
1033	14	1	2	G.33	0
1034	14	1	2	G.34	0
1035	14	1	2	G.35	0
1036	14	1	2	G.36	0
1037	14	1	2	G.37	0
1038	14	1	2	G.38	0
1039	14	1	2	G.39	0
1040	14	1	2	G.40	0
1041	14	1	3	G.1	1
1042	14	1	3	G.2	0
1043	14	1	3	G.3	0
1044	14	1	3	G.4	0
1045	14	1	3	G.5	1
1046	14	1	3	G.6	1
1047	14	1	3	G.7	0
1048	14	1	3	G.8	0
1049	14	1	3	G.9	0
1050	14	1	3	G.10	0
1051	14	1	3	G.11	0
1052	14	1	3	G.12	0
1053	14	1	3	G.13	0
1054	14	1	3	G.14	0
1055	14	1	3	G.15	0
1056	14	1	3	G.16	0
1057	14	1	3	G.17	0
1058	14	1	3	G.18	0
1059	14	1	3	G.19	0
1060	14	1	3	G.20	0
1061	14	1	3	G.21	0
1062	14	1	3	G.22	0
1063	14	1	3	G.23	0
1064	14	1	3	G.24	0
1065	14	1	3	G.25	0
1066	14	1	3	G.26	0
1067	14	1	3	G.27	0
1068	14	1	3	G.28	0
1069	14	1	3	G.29	0
1070	14	1	3	G.30	0
1071	14	1	3	G.31	0
1072	14	1	3	G.32	0
1073	14	1	3	G.33	0
1074	14	1	3	G.34	0
1075	14	1	3	G.35	0
1076	14	1	3	G.36	0
1077	14	1	3	G.37	0
1078	14	1	3	G.38	0
1079	14	1	3	G.39	0
1080	14	1	3	G.40	0
1081	14	1	4	G.1	1
1082	14	1	4	G.2	0
1083	14	1	4	G.3	0
1084	14	1	4	G.4	0
1085	14	1	4	G.5	1
1086	14	1	4	G.6	0
1087	14	1	4	G.7	1
1088	14	1	4	G.8	1
1089	14	1	4	G.9	0
1090	14	1	4	G.10	0
1091	14	1	4	G.11	0
1092	14	1	4	G.12	0
1093	14	1	4	G.13	0
1094	14	1	4	G.14	0
1095	14	1	4	G.15	0
1096	14	1	4	G.16	0
1097	14	1	4	G.17	0
1098	14	1	4	G.18	0
1099	14	1	4	G.19	0
1100	14	1	4	G.20	0
1101	14	1	4	G.21	0
1102	14	1	4	G.22	0
1103	14	1	4	G.23	0
1104	14	1	4	G.24	0
1105	14	1	4	G.25	0
1106	14	1	4	G.26	0
1107	14	1	4	G.27	0
1108	14	1	4	G.28	0
1109	14	1	4	G.29	0
1110	14	1	4	G.30	0
1111	14	1	4	G.31	0
1112	14	1	4	G.32	0
1113	14	1	4	G.33	0
1114	14	1	4	G.34	0
1115	14	1	4	G.35	0
1116	14	1	4	G.36	0
1117	14	1	4	G.37	0
1118	14	1	4	G.38	0
1119	14	1	4	G.39	0
1120	14	1	4	G.40	0
1121	14	2	1	H.1	1					1	1	10
1122	14	2	1	H.2	1					2	1
1123	14	2	1	H.3	1					2	1
1124	14	2	1	H.4	1					1	1
1125	14	2	1	H.5	0					1	1
1126	14	2	1	H.6	0					2	1
1127	14	2	1	H.7	0					2	1
1128	14	2	1	H.8	0					1	1
1129	14	2	1	H.9	0					1	1
1130	14	2	1	H.10	0					1	1
1131	14	2	1	H.11	0					0	0
1132	14	2	1	H.12	0					0	0
1133	14	2	1	H.13	0					0	0
1134	14	2	1	H.14	0					0	0
1135	14	2	1	H.15	0					0	0
1136	14	2	1	H.16	0					0	0
1137	14	2	1	H.17	0					0	0
1138	14	2	1	H.18	0					0	0
1139	14	2	1	H.19	0					0	0
1140	14	2	1	H.20	0					0	0
1141	14	2	1	H.21	0					0	0
1142	14	2	1	H.22	0					0	0
1143	14	2	1	H.23	0					0	0
1144	14	2	1	H.24	0					0	0
1145	14	2	1	H.25	0					0	0
1146	14	2	1	H.26	0					0	0
1147	14	2	1	H.27	0					0	0
1148	14	2	1	H.28	0					0	0
1149	14	2	1	H.29	0					0	0
1150	14	2	1	H.30	0					0	0
1151	14	2	1	H.31	0					0	0
1152	14	2	1	H.32	0					0	0
1153	14	2	1	H.33	0					0	0
1154	14	2	1	H.34	0					0	0
1155	14	2	1	H.35	0					0	0
1156	14	2	1	H.36	0					0	0
1157	14	2	1	H.37	0					0	0
1158	14	2	1	H.38	0					0	0
1159	14	2	1	H.39	0					0	0
1160	14	2	1	H.40	0					0	0
1161	14	2	2	H.1	0
1162	14	2	2	H.2	0
1163	14	2	2	H.3	1
1164	14	2	2	H.4	0
1165	14	2	2	H.5	1
1166	14	2	2	H.6	1
1167	14	2	2	H.7	1
1168	14	2	2	H.8	1
1169	14	2	2	H.9	0
1170	14	2	2	H.10	0
1171	14	2	2	H.11	0
1172	14	2	2	H.12	0
1173	14	2	2	H.13	0
1174	14	2	2	H.14	0
1175	14	2	2	H.15	0
1176	14	2	2	H.16	0
1177	14	2	2	H.17	0
1178	14	2	2	H.18	0
1179	14	2	2	H.19	0
1180	14	2	2	H.20	0
1181	14	2	2	H.21	0
1182	14	2	2	H.22	0
1183	14	2	2	H.23	0
1184	14	2	2	H.24	0
1185	14	2	2	H.25	0
1186	14	2	2	H.26	0
1187	14	2	2	H.27	0
1188	14	2	2	H.28	0
1189	14	2	2	H.29	0
1190	14	2	2	H.30	0
1191	14	2	2	H.31	0
1192	14	2	2	H.32	0
1193	14	2	2	H.33	0
1194	14	2	2	H.34	0
1195	14	2	2	H.35	0
1196	14	2	2	H.36	0
1197	14	2	2	H.37	0
1198	14	2	2	H.38	0
1199	14	2	2	H.39	0
1200	14	2	2	H.40	0
1201	14	2	3	H.1	0
1202	14	2	3	H.2	0
1203	14	2	3	H.3	0
1204	14	2	3	H.4	0
1205	14	2	3	H.5	0
1206	14	2	3	H.6	1
1207	14	2	3	H.7	0
1208	14	2	3	H.8	0
1209	14	2	3	H.9	1
1210	14	2	3	H.10	0
1211	14	2	3	H.11	0
1212	14	2	3	H.12	0
1213	14	2	3	H.13	0
1214	14	2	3	H.14	0
1215	14	2	3	H.15	0
1216	14	2	3	H.16	0
1217	14	2	3	H.17	0
1218	14	2	3	H.18	0
1219	14	2	3	H.19	0
1220	14	2	3	H.20	0
1221	14	2	3	H.21	0
1222	14	2	3	H.22	0
1223	14	2	3	H.23	0
1224	14	2	3	H.24	0
1225	14	2	3	H.25	0
1226	14	2	3	H.26	0
1227	14	2	3	H.27	0
1228	14	2	3	H.28	0
1229	14	2	3	H.29	0
1230	14	2	3	H.30	0
1231	14	2	3	H.31	0
1232	14	2	3	H.32	0
1233	14	2	3	H.33	0
1234	14	2	3	H.34	0
1235	14	2	3	H.35	0
1236	14	2	3	H.36	0
1237	14	2	3	H.37	0
1238	14	2	3	H.38	0
1239	14	2	3	H.39	0
1240	14	2	3	H.40	0
1241	14	2	4	H.1	0
1242	14	2	4	H.2	1
1243	14	2	4	H.3	0
1244	14	2	4	H.4	0
1245	14	2	4	H.5	0
1246	14	2	4	H.6	0
1247	14	2	4	H.7	1
1248	14	2	4	H.8	0
1249	14	2	4	H.9	0
1250	14	2	4	H.10	1
1251	14	2	4	H.11	0
1252	14	2	4	H.12	0
1253	14	2	4	H.13	0
1254	14	2	4	H.14	0
1255	14	2	4	H.15	0
1256	14	2	4	H.16	0
1257	14	2	4	H.17	0
1258	14	2	4	H.18	0
1259	14	2	4	H.19	0
1260	14	2	4	H.20	0
1261	14	2	4	H.21	0
1262	14	2	4	H.22	0
1263	14	2	4	H.23	0
1264	14	2	4	H.24	0
1265	14	2	4	H.25	0
1266	14	2	4	H.26	0
1267	14	2	4	H.27	0
1268	14	2	4	H.28	0
1269	14	2	4	H.29	0
1270	14	2	4	H.30	0
1271	14	2	4	H.31	0
1272	14	2	4	H.32	0
1273	14	2	4	H.33	0
1274	14	2	4	H.34	0
1275	14	2	4	H.35	0
1276	14	2	4	H.36	0
1277	14	2	4	H.37	0
1278	14	2	4	H.38	0
1279	14	2	4	H.39	0
1280	14	2	4	H.40	0
1281	4	1	1	I.1	1					1	1	6
1282	4	1	1	I.2	1					1	1
1283	4	1	1	I.3	0					2	1
1284	4	1	1	I.4	0					2	1
1285	4	1	1	I.5	0					1	1
1286	4	1	1	I.6	0					2	1
1287	4	1	1	I.7	0					0	0
1288	4	1	1	I.8	0					0	0
1289	4	1	1	I.9	0					0	0
1290	4	1	1	I.10	0					0	0
1291	4	1	1	I.11	0					0	0
1292	4	1	1	I.12	0					0	0
1293	4	1	1	I.13	0					0	0
1294	4	1	1	I.14	0					0	0
1295	4	1	1	I.15	0					0	0
1296	4	1	1	I.16	0					0	0
1297	4	1	1	I.17	0					0	0
1298	4	1	1	I.18	0					0	0
1299	4	1	1	I.19	0					0	0
1300	4	1	1	I.20	0					0	0
1301	4	1	1	I.21	0					0	0
1302	4	1	1	I.22	0					0	0
1303	4	1	1	I.23	0					0	0
1304	4	1	1	I.24	0					0	0
1305	4	1	1	I.25	0					0	0
1306	4	1	1	I.26	0					0	0
1307	4	1	1	I.27	0					0	0
1308	4	1	1	I.28	0					0	0
1309	4	1	1	I.29	0					0	0
1310	4	1	1	I.30	0					0	0
1311	4	1	1	I.31	0					0	0
1312	4	1	1	I.32	0					0	0
1313	4	1	1	I.33	0					0	0
1314	4	1	1	I.34	0					0	0
1315	4	1	1	I.35	0					0	0
1316	4	1	1	I.36	0					0	0
1317	4	1	1	I.37	0					0	0
1318	4	1	1	I.38	0					0	0
1319	4	1	1	I.39	0					0	0
1320	4	1	1	I.40	0					0	0
1321	4	1	2	I.1	0
1322	4	1	2	I.2	0
1323	4	1	2	I.3	1
1324	4	1	2	I.4	1
1325	4	1	2	I.5	1
1326	4	1	2	I.6	0
1327	4	1	2	I.7	0
1328	4	1	2	I.8	0
1329	4	1	2	I.9	0
1330	4	1	2	I.10	0
1331	4	1	2	I.11	0
1332	4	1	2	I.12	0
1333	4	1	2	I.13	0
1334	4	1	2	I.14	0
1335	4	1	2	I.15	0
1336	4	1	2	I.16	0
1337	4	1	2	I.17	0
1338	4	1	2	I.18	0
1339	4	1	2	I.19	0
1340	4	1	2	I.20	0
1341	4	1	2	I.21	0
1342	4	1	2	I.22	0
1343	4	1	2	I.23	0
1344	4	1	2	I.24	0
1345	4	1	2	I.25	0
1346	4	1	2	I.26	0
1347	4	1	2	I.27	0
1348	4	1	2	I.28	0
1349	4	1	2	I.29	0
1350	4	1	2	I.30	0
1351	4	1	2	I.31	0
1352	4	1	2	I.32	0
1353	4	1	2	I.33	0
1354	4	1	2	I.34	0
1355	4	1	2	I.35	0
1356	4	1	2	I.36	0
1357	4	1	2	I.37	0
1358	4	1	2	I.38	0
1359	4	1	2	I.39	0
1360	4	1	2	I.40	0
1361	4	1	3	I.1	0
1362	4	1	3	I.2	0
1363	4	1	3	I.3	0
1364	4	1	3	I.4	1
1365	4	1	3	I.5	0
1366	4	1	3	I.6	1
1367	4	1	3	I.7	0
1368	4	1	3	I.8	0
1369	4	1	3	I.9	0
1370	4	1	3	I.10	0
1371	4	1	3	I.11	0
1372	4	1	3	I.12	0
1373	4	1	3	I.13	0
1374	4	1	3	I.14	0
1375	4	1	3	I.15	0
1376	4	1	3	I.16	0
1377	4	1	3	I.17	0
1378	4	1	3	I.18	0
1379	4	1	3	I.19	0
1380	4	1	3	I.20	0
1381	4	1	3	I.21	0
1382	4	1	3	I.22	0
1383	4	1	3	I.23	0
1384	4	1	3	I.24	0
1385	4	1	3	I.25	0
1386	4	1	3	I.26	0
1387	4	1	3	I.27	0
1388	4	1	3	I.28	0
1389	4	1	3	I.29	0
1390	4	1	3	I.30	0
1391	4	1	3	I.31	0
1392	4	1	3	I.32	0
1393	4	1	3	I.33	0
1394	4	1	3	I.34	0
1395	4	1	3	I.35	0
1396	4	1	3	I.36	0
1397	4	1	3	I.37	0
1398	4	1	3	I.38	0
1399	4	1	3	I.39	0
1400	4	1	3	I.40	0
1401	4	1	4	I.1	0
1402	4	1	4	I.2	0
1403	4	1	4	I.3	1
1404	4	1	4	I.4	0
1405	4	1	4	I.5	0
1406	4	1	4	I.6	1
1407	4	1	4	I.7	0
1408	4	1	4	I.8	0
1409	4	1	4	I.9	0
1410	4	1	4	I.10	0
1411	4	1	4	I.11	0
1412	4	1	4	I.12	0
1413	4	1	4	I.13	0
1414	4	1	4	I.14	0
1415	4	1	4	I.15	0
1416	4	1	4	I.16	0
1417	4	1	4	I.17	0
1418	4	1	4	I.18	0
1419	4	1	4	I.19	0
1420	4	1	4	I.20	0
1421	4	1	4	I.21	0
1422	4	1	4	I.22	0
1423	4	1	4	I.23	0
1424	4	1	4	I.24	0
1425	4	1	4	I.25	0
1426	4	1	4	I.26	0
1427	4	1	4	I.27	0
1428	4	1	4	I.28	0
1429	4	1	4	I.29	0
1430	4	1	4	I.30	0
1431	4	1	4	I.31	0
1432	4	1	4	I.32	0
1433	4	1	4	I.33	0
1434	4	1	4	I.34	0
1435	4	1	4	I.35	0
1436	4	1	4	I.36	0
1437	4	1	4	I.37	0
1438	4	1	4	I.38	0
1439	4	1	4	I.39	0
1440	4	1	4	I.40	0
1441	4	2	1	J.1	1					2	1	5
1442	4	2	1	J.2	1					1	1
1443	4	2	1	J.3	1					2	1
1444	4	2	1	J.4	0					1	1
1445	4	2	1	J.5	0					1	1
1446	4	2	1	J.6	0					0	0
1447	4	2	1	J.7	0					0	0
1448	4	2	1	J.8	0					0	0
1449	4	2	1	J.9	0					0	0
1450	4	2	1	J.10	0					0	0
1451	4	2	1	J.11	0					0	0
1452	4	2	1	J.12	0					0	0
1453	4	2	1	J.13	0					0	0
1454	4	2	1	J.14	0					0	0
1455	4	2	1	J.15	0					0	0
1456	4	2	1	J.16	0					0	0
1457	4	2	1	J.17	0					0	0
1458	4	2	1	J.18	0					0	0
1459	4	2	1	J.19	0					0	0
1460	4	2	1	J.20	0					0	0
1461	4	2	1	J.21	0					0	0
1462	4	2	1	J.22	0					0	0
1463	4	2	1	J.23	0					0	0
1464	4	2	1	J.24	0					0	0
1465	4	2	1	J.25	0					0	0
1466	4	2	1	J.26	0					0	0
1467	4	2	1	J.27	0					0	0
1468	4	2	1	J.28	0					0	0
1469	4	2	1	J.29	0					0	0
1470	4	2	1	J.30	0					0	0
1471	4	2	1	J.31	0					0	0
1472	4	2	1	J.32	0					0	0
1473	4	2	1	J.33	0					0	0
1474	4	2	1	J.34	0					0	0
1475	4	2	1	J.35	0					0	0
1476	4	2	1	J.36	0					0	0
1477	4	2	1	J.37	0					0	0
1478	4	2	1	J.38	0					0	0
1479	4	2	1	J.39	0					0	0
1480	4	2	1	J.40	0					0	0
1481	4	2	2	J.1	0
1482	4	2	2	J.2	0
1483	4	2	2	J.3	1
1484	4	2	2	J.4	1
1485	4	2	2	J.5	0
1486	4	2	2	J.6	0
1487	4	2	2	J.7	0
1488	4	2	2	J.8	0
1489	4	2	2	J.9	0
1490	4	2	2	J.10	0
1491	4	2	2	J.11	0
1492	4	2	2	J.12	0
1493	4	2	2	J.13	0
1494	4	2	2	J.14	0
1495	4	2	2	J.15	0
1496	4	2	2	J.16	0
1497	4	2	2	J.17	0
1498	4	2	2	J.18	0
1499	4	2	2	J.19	0
1500	4	2	2	J.20	0
1501	4	2	2	J.21	0
1502	4	2	2	J.22	0
1503	4	2	2	J.23	0
1504	4	2	2	J.24	0
1505	4	2	2	J.25	0
1506	4	2	2	J.26	0
1507	4	2	2	J.27	0
1508	4	2	2	J.28	0
1509	4	2	2	J.29	0
1510	4	2	2	J.30	0
1511	4	2	2	J.31	0
1512	4	2	2	J.32	0
1513	4	2	2	J.33	0
1514	4	2	2	J.34	0
1515	4	2	2	J.35	0
1516	4	2	2	J.36	0
1517	4	2	2	J.37	0
1518	4	2	2	J.38	0
1519	4	2	2	J.39	0
1520	4	2	2	J.40	0
1521	4	2	3	J.1		no.data-empty cells
1522	4	2	3	J.2		no.data-empty cells
1523	4	2	3	J.3		no.data-empty cells
1524	4	2	3	J.4		no.data-empty cells
1525	4	2	3	J.5		no.data-empty cells
1526	4	2	3	J.6		no.data-empty cells
1527	4	2	3	J.7		no.data-empty cells
1528	4	2	3	J.8		no.data-empty cells
1529	4	2	3	J.9		no.data-empty cells
1530	4	2	3	J.10		no.data-empty cells
1531	4	2	3	J.11		no.data-empty cells
1532	4	2	3	J.12		no.data-empty cells
1533	4	2	3	J.13		no.data-empty cells
1534	4	2	3	J.14		no.data-empty cells
1535	4	2	3	J.15		no.data-empty cells
1536	4	2	3	J.16		no.data-empty cells
1537	4	2	3	J.17		no.data-empty cells
1538	4	2	3	J.18		no.data-empty cells
1539	4	2	3	J.19		no.data-empty cells
1540	4	2	3	J.20		no.data-empty cells
1541	4	2	3	J.21		no.data-empty cells
1542	4	2	3	J.22		no.data-empty cells
1543	4	2	3	J.23		no.data-empty cells
1544	4	2	3	J.24		no.data-empty cells
1545	4	2	3	J.25		no.data-empty cells
1546	4	2	3	J.26		no.data-empty cells
1547	4	2	3	J.27		no.data-empty cells
1548	4	2	3	J.28		no.data-empty cells
1549	4	2	3	J.29		no.data-empty cells
1550	4	2	3	J.30		no.data-empty cells
1551	4	2	3	J.31		no.data-empty cells
1552	4	2	3	J.32		no.data-empty cells
1553	4	2	3	J.33		no.data-empty cells
1554	4	2	3	J.34		no.data-empty cells
1555	4	2	3	J.35		no.data-empty cells
1556	4	2	3	J.36		no.data-empty cells
1557	4	2	3	J.37		no.data-empty cells
1558	4	2	3	J.38		no.data-empty cells
1559	4	2	3	J.39		no.data-empty cells
1560	4	2	3	J.40		no.data-empty cells
1561	4	2	4	J.1	1
1562	4	2	4	J.2	0
1563	4	2	4	J.3	0
1564	4	2	4	J.4	0
1565	4	2	4	J.5	1
1566	4	2	4	J.6	0
1567	4	2	4	J.7	0
1568	4	2	4	J.8	0
1569	4	2	4	J.9	0
1570	4	2	4	J.10	0
1571	4	2	4	J.11	0
1572	4	2	4	J.12	0
1573	4	2	4	J.13	0
1574	4	2	4	J.14	0
1575	4	2	4	J.15	0
1576	4	2	4	J.16	0
1577	4	2	4	J.17	0
1578	4	2	4	J.18	0
1579	4	2	4	J.19	0
1580	4	2	4	J.20	0
1581	4	2	4	J.21	0
1582	4	2	4	J.22	0
1583	4	2	4	J.23	0
1584	4	2	4	J.24	0
1585	4	2	4	J.25	0
1586	4	2	4	J.26	0
1587	4	2	4	J.27	0
1588	4	2	4	J.28	0
1589	4	2	4	J.29	0
1590	4	2	4	J.30	0
1591	4	2	4	J.31	0
1592	4	2	4	J.32	0
1593	4	2	4	J.33	0
1594	4	2	4	J.34	0
1595	4	2	4	J.35	0
1596	4	2	4	J.36	0
1597	4	2	4	J.37	0
1598	4	2	4	J.38	0
1599	4	2	4	J.39	0
1600	4	2	4	J.40	0
1601	20	1	1	K.1	1					1	1	6
1602	20	1	1	K.2	1					1	1
1603	20	1	1	K.3	0					2	1
1604	20	1	1	K.4	0					1	1
1605	20	1	1	K.5	0					1	1
1606	20	1	1	K.6	0					1	1
1607	20	1	1	K.7	0					0	0
1608	20	1	1	K.8	0					0	0
1609	20	1	1	K.9	0					0	0
1610	20	1	1	K.10	0					0	0
1611	20	1	1	K.11	0					0	0
1612	20	1	1	K.12	0					0	0
1613	20	1	1	K.13	0					0	0
1614	20	1	1	K.14	0					0	0
1615	20	1	1	K.15	0					0	0
1616	20	1	1	K.16	0					0	0
1617	20	1	1	K.17	0					0	0
1618	20	1	1	K.18	0					0	0
1619	20	1	1	K.19	0					0	0
1620	20	1	1	K.20	0					0	0
1621	20	1	1	K.21	0					0	0
1622	20	1	1	K.22	0					0	0
1623	20	1	1	K.23	0					0	0
1624	20	1	1	K.24	0					0	0
1625	20	1	1	K.25	0					0	0
1626	20	1	1	K.26	0					0	0
1627	20	1	1	K.27	0					0	0
1628	20	1	1	K.28	0					0	0
1629	20	1	1	K.29	0					0	0
1630	20	1	1	K.30	0					0	0
1631	20	1	1	K.31	0					0	0
1632	20	1	1	K.32	0					0	0
1633	20	1	1	K.33	0					0	0
1634	20	1	1	K.34	0					0	0
1635	20	1	1	K.35	0					0	0
1636	20	1	1	K.36	0					0	0
1637	20	1	1	K.37	0					0	0
1638	20	1	1	K.38	0					0	0
1639	20	1	1	K.39	0					0	0
1640	20	1	1	K.40	0					0	0
1641	20	1	2	K.1	0
1642	20	1	2	K.2	0
1643	20	1	2	K.3	1
1644	20	1	2	K.4	1
1645	20	1	2	K.5	0
1646	20	1	2	K.6	0
1647	20	1	2	K.7	0
1648	20	1	2	K.8	0
1649	20	1	2	K.9	0
1650	20	1	2	K.10	0
1651	20	1	2	K.11	0
1652	20	1	2	K.12	0
1653	20	1	2	K.13	0
1654	20	1	2	K.14	0
1655	20	1	2	K.15	0
1656	20	1	2	K.16	0
1657	20	1	2	K.17	0
1658	20	1	2	K.18	0
1659	20	1	2	K.19	0
1660	20	1	2	K.20	0
1661	20	1	2	K.21	0
1662	20	1	2	K.22	0
1663	20	1	2	K.23	0
1664	20	1	2	K.24	0
1665	20	1	2	K.25	0
1666	20	1	2	K.26	0
1667	20	1	2	K.27	0
1668	20	1	2	K.28	0
1669	20	1	2	K.29	0
1670	20	1	2	K.30	0
1671	20	1	2	K.31	0
1672	20	1	2	K.32	0
1673	20	1	2	K.33	0
1674	20	1	2	K.34	0
1675	20	1	2	K.35	0
1676	20	1	2	K.36	0
1677	20	1	2	K.37	0
1678	20	1	2	K.38	0
1679	20	1	2	K.39	0
1680	20	1	2	K.40	0
1681	20	1	3	K.1	0
1682	20	1	3	K.2	0
1683	20	1	3	K.3	1
1684	20	1	3	K.4	0
1685	20	1	3	K.5	0
1686	20	1	3	K.6	0
1687	20	1	3	K.7	0
1688	20	1	3	K.8	0
1689	20	1	3	K.9	0
1690	20	1	3	K.10	0
1691	20	1	3	K.11	0
1692	20	1	3	K.12	0
1693	20	1	3	K.13	0
1694	20	1	3	K.14	0
1695	20	1	3	K.15	0
1696	20	1	3	K.16	0
1697	20	1	3	K.17	0
1698	20	1	3	K.18	0
1699	20	1	3	K.19	0
1700	20	1	3	K.20	0
1701	20	1	3	K.21	0
1702	20	1	3	K.22	0
1703	20	1	3	K.23	0
1704	20	1	3	K.24	0
1705	20	1	3	K.25	0
1706	20	1	3	K.26	0
1707	20	1	3	K.27	0
1708	20	1	3	K.28	0
1709	20	1	3	K.29	0
1710	20	1	3	K.30	0
1711	20	1	3	K.31	0
1712	20	1	3	K.32	0
1713	20	1	3	K.33	0
1714	20	1	3	K.34	0
1715	20	1	3	K.35	0
1716	20	1	3	K.36	0
1717	20	1	3	K.37	0
1718	20	1	3	K.38	0
1719	20	1	3	K.39	0
1720	20	1	3	K.40	0
1721	20	1	4	K.1	0
1722	20	1	4	K.2	0
1723	20	1	4	K.3	0
1724	20	1	4	K.4	0
1725	20	1	4	K.5	1
1726	20	1	4	K.6	1
1727	20	1	4	K.7	0
1728	20	1	4	K.8	0
1729	20	1	4	K.9	0
1730	20	1	4	K.10	0
1731	20	1	4	K.11	0
1732	20	1	4	K.12	0
1733	20	1	4	K.13	0
1734	20	1	4	K.14	0
1735	20	1	4	K.15	0
1736	20	1	4	K.16	0
1737	20	1	4	K.17	0
1738	20	1	4	K.18	0
1739	20	1	4	K.19	0
1740	20	1	4	K.20	0
1741	20	1	4	K.21	0
1742	20	1	4	K.22	0
1743	20	1	4	K.23	0
1744	20	1	4	K.24	0
1745	20	1	4	K.25	0
1746	20	1	4	K.26	0
1747	20	1	4	K.27	0
1748	20	1	4	K.28	0
1749	20	1	4	K.29	0
1750	20	1	4	K.30	0
1751	20	1	4	K.31	0
1752	20	1	4	K.32	0
1753	20	1	4	K.33	0
1754	20	1	4	K.34	0
1755	20	1	4	K.35	0
1756	20	1	4	K.36	0
1757	20	1	4	K.37	0
1758	20	1	4	K.38	0
1759	20	1	4	K.39	0
1760	20	1	4	K.40	0
1761	20	2	1	L.1	1					4	1	4
1762	20	2	1	L.2	1					1	1
1763	20	2	1	L.3	0					1	1
1764	20	2	1	L.4	0					1	1
1765	20	2	1	L.5	0					0	0
1766	20	2	1	L.6	0					0	0
1767	20	2	1	L.7	0					0	0
1768	20	2	1	L.8	0					0	0
1769	20	2	1	L.9	0					0	0
1770	20	2	1	L.10	0					0	0
1771	20	2	1	L.11	0					0	0
1772	20	2	1	L.12	0					0	0
1773	20	2	1	L.13	0					0	0
1774	20	2	1	L.14	0					0	0
1775	20	2	1	L.15	0					0	0
1776	20	2	1	L.16	0					0	0
1777	20	2	1	L.17	0					0	0
1778	20	2	1	L.18	0					0	0
1779	20	2	1	L.19	0					0	0
1780	20	2	1	L.20	0					0	0
1781	20	2	1	L.21	0					0	0
1782	20	2	1	L.22	0					0	0
1783	20	2	1	L.23	0					0	0
1784	20	2	1	L.24	0					0	0
1785	20	2	1	L.25	0					0	0
1786	20	2	1	L.26	0					0	0
1787	20	2	1	L.27	0					0	0
1788	20	2	1	L.28	0					0	0
1789	20	2	1	L.29	0					0	0
1790	20	2	1	L.30	0					0	0
1791	20	2	1	L.31	0					0	0
1792	20	2	1	L.32	0					0	0
1793	20	2	1	L.33	0					0	0
1794	20	2	1	L.34	0					0	0
1795	20	2	1	L.35	0					0	0
1796	20	2	1	L.36	0					0	0
1797	20	2	1	L.37	0					0	0
1798	20	2	1	L.38	0					0	0
1799	20	2	1	L.39	0					0	0
1800	20	2	1	L.40	0					0	0
1801	20	2	2	L.1	1
1802	20	2	2	L.2	0
1803	20	2	2	L.3	0
1804	20	2	2	L.4	0
1805	20	2	2	L.5	0
1806	20	2	2	L.6	0
1807	20	2	2	L.7	0
1808	20	2	2	L.8	0
1809	20	2	2	L.9	0
1810	20	2	2	L.10	0
1811	20	2	2	L.11	0
1812	20	2	2	L.12	0
1813	20	2	2	L.13	0
1814	20	2	2	L.14	0
1815	20	2	2	L.15	0
1816	20	2	2	L.16	0
1817	20	2	2	L.17	0
1818	20	2	2	L.18	0
1819	20	2	2	L.19	0
1820	20	2	2	L.20	0
1821	20	2	2	L.21	0
1822	20	2	2	L.22	0
1823	20	2	2	L.23	0
1824	20	2	2	L.24	0
1825	20	2	2	L.25	0
1826	20	2	2	L.26	0
1827	20	2	2	L.27	0
1828	20	2	2	L.28	0
1829	20	2	2	L.29	0
1830	20	2	2	L.30	0
1831	20	2	2	L.31	0
1832	20	2	2	L.32	0
1833	20	2	2	L.33	0
1834	20	2	2	L.34	0
1835	20	2	2	L.35	0
1836	20	2	2	L.36	0
1837	20	2	2	L.37	0
1838	20	2	2	L.38	0
1839	20	2	2	L.39	0
1840	20	2	2	L.40	0
1841	20	2	3	L.1	1
1842	20	2	3	L.2	0
1843	20	2	3	L.3	1
1844	20	2	3	L.4	1
1845	20	2	3	L.5	0
1846	20	2	3	L.6	0
1847	20	2	3	L.7	0
1848	20	2	3	L.8	0
1849	20	2	3	L.9	0
1850	20	2	3	L.10	0
1851	20	2	3	L.11	0
1852	20	2	3	L.12	0
1853	20	2	3	L.13	0
1854	20	2	3	L.14	0
1855	20	2	3	L.15	0
1856	20	2	3	L.16	0
1857	20	2	3	L.17	0
1858	20	2	3	L.18	0
1859	20	2	3	L.19	0
1860	20	2	3	L.20	0
1861	20	2	3	L.21	0
1862	20	2	3	L.22	0
1863	20	2	3	L.23	0
1864	20	2	3	L.24	0
1865	20	2	3	L.25	0
1866	20	2	3	L.26	0
1867	20	2	3	L.27	0
1868	20	2	3	L.28	0
1869	20	2	3	L.29	0
1870	20	2	3	L.30	0
1871	20	2	3	L.31	0
1872	20	2	3	L.32	0
1873	20	2	3	L.33	0
1874	20	2	3	L.34	0
1875	20	2	3	L.35	0
1876	20	2	3	L.36	0
1877	20	2	3	L.37	0
1878	20	2	3	L.38	0
1879	20	2	3	L.39	0
1880	20	2	3	L.40	0
1881	20	2	4	L.1	1
1882	20	2	4	L.2	0
1883	20	2	4	L.3	0
1884	20	2	4	L.4	0
1885	20	2	4	L.5	0
1886	20	2	4	L.6	0
1887	20	2	4	L.7	0
1888	20	2	4	L.8	0
1889	20	2	4	L.9	0
1890	20	2	4	L.10	0
1891	20	2	4	L.11	0
1892	20	2	4	L.12	0
1893	20	2	4	L.13	0
1894	20	2	4	L.14	0
1895	20	2	4	L.15	0
1896	20	2	4	L.16	0
1897	20	2	4	L.17	0
1898	20	2	4	L.18	0
1899	20	2	4	L.19	0
1900	20	2	4	L.20	0
1901	20	2	4	L.21	0
1902	20	2	4	L.22	0
1903	20	2	4	L.23	0
1904	20	2	4	L.24	0
1905	20	2	4	L.25	0
1906	20	2	4	L.26	0
1907	20	2	4	L.27	0
1908	20	2	4	L.28	0
1909	20	2	4	L.29	0
1910	20	2	4	L.30	0
1911	20	2	4	L.31	0
1912	20	2	4	L.32	0
1913	20	2	4	L.33	0
1914	20	2	4	L.34	0
1915	20	2	4	L.35	0
1916	20	2	4	L.36	0
1917	20	2	4	L.37	0
1918	20	2	4	L.38	0
1919	20	2	4	L.39	0
1920	20	2	4	L.40	0

## Sheet: Simulation
These columns are sorted by 'random' (column B), in this way tool use events are randomly assigned							Same number of events as in Observed data	Same number of sub-colonies as in Observed data		The calculation of number of tool users per sub-colony is done in the same way as in "Observed data"
sort	sort	sort	sort	sort	sort	sort		average N of tool users per subcolony		136	126
Line.NR	random	Colony	Subcolony	Trial	ID.ant	Tool.users	136.tool.use.events	10.5		individual.tool.users_N.repeated.events	individual.tool.users_yes.no	N tool users per subcolony
1	0.569724	1	1	1	A.1	0	1			0	0	13
2	0.444183	1	1	1	A.2	0	2			1	1
3	0.025482	1	1	1	A.3	1	3			1	1
4	0.411846	1	1	1	A.4	0	4			0	0
5	0.454222	1	1	1	A.5	0	5			0	0
6	0.777816	1	1	1	A.6	0	6			0	0
7	0.760915	1	1	1	A.7	0	7			0	0
8	0.88662	1	1	1	A.8	0	8			1	1
9	0.470009	1	1	1	A.9	0	9			0	0
10	0.107585	1	1	1	A.10	0	10			0	0
11	0.618631	1	1	1	A.11	0	11			1	1
12	0.46803	1	1	1	A.12	0	12			0	0
13	0.309281	1	1	1	A.13	0	13			0	0
14	0.544675	1	1	1	A.14	0	14			1	1
15	0.908552	1	1	1	A.15	0	15			0	0
16	0.939238	1	1	1	A.16	0	16			0	0
17	0.401847	1	1	1	A.17	0	17			1	1
18	0.257517	1	1	1	A.18	0	18			0	0
19	0.552538	1	1	1	A.19	0	19			0	0
20	0.249553	1	1	1	A.20	0	20			0	0
21	0.638013	1	1	1	A.21	0	21			1	1
22	0.962578	1	1	1	A.22	0	22			0	0
23	0.871094	1	1	1	A.23	0	23			1	1
24	0.828745	1	1	1	A.24	0	24			1	1
25	0.434898	1	1	1	A.25	0	25			1	1
26	0.186098	1	1	1	A.26	0	26			0	0
27	0.300531	1	1	1	A.27	0	27			0	0
28	0.763193	1	1	1	A.28	0	28			0	0
29	0.4023	1	1	1	A.29	0	29			0	0
30	0.336959	1	1	1	A.30	0	30			1	1
31	0.119139	1	1	1	A.31	0	31			0	0
32	0.387339	1	1	1	A.32	0	32			0	0
33	0.899833	1	1	1	A.33	0	33			0	0
34	0.0675168	1	1	1	A.34	0	34			0	0
35	0.80213	1	1	1	A.35	0	35			1	1
36	0.487116	1	1	1	A.36	0	36			0	0
37	0.0457446	1	1	1	A.37	0	37			0	0
38	0.728943	1	1	1	A.38	0	38			0	0
39	0.632677	1	1	1	A.39	0	39			0	0
40	0.298092	1	1	1	A.40	1	40			1	1
41	0.499655	1	1	2	A.1	0	41
42	0.497411	1	1	2	A.2	0	42
43	0.877846	1	1	2	A.3	0	43
44	0.369254	1	1	2	A.4	0	44
45	0.396984	1	1	2	A.5	0	45
46	0.26423	1	1	2	A.6	0	46
47	0.080146	1	1	2	A.7	0	47
48	0.511771	1	1	2	A.8	1	48
49	0.707434	1	1	2	A.9	0	49
50	0.660585	1	1	2	A.10	0	50
51	0.165365	1	1	2	A.11	1	51
52	0.836906	1	1	2	A.12	0	52
53	0.991728	1	1	2	A.13	0	53
54	0.829535	1	1	2	A.14	1	54
55	0.268524	1	1	2	A.15	0	55
56	0.514163	1	1	2	A.16	0	56
57	0.762845	1	1	2	A.17	0	57
58	0.804415	1	1	2	A.18	0	58
59	0.0676858	1	1	2	A.19	0	59
60	0.273597	1	1	2	A.20	0	60
61	0.108024	1	1	2	A.21	0	61
62	0.215458	1	1	2	A.22	0	62
63	0.284523	1	1	2	A.23	0	63
64	0.739237	1	1	2	A.24	1	64
65	0.49112	1	1	2	A.25	1	65
66	0.926183	1	1	2	A.26	0	66
67	0.197859	1	1	2	A.27	0	67
68	0.647855	1	1	2	A.28	0	68
69	0.419101	1	1	2	A.29	0	69
70	0.992049	1	1	2	A.30	1	70
71	0.148021	1	1	2	A.31	0	71
72	0.705865	1	1	2	A.32	0	72
73	0.749612	1	1	2	A.33	0	73
74	0.863083	1	1	2	A.34	0	74
75	0.807126	1	1	2	A.35	0	75
76	0.80911	1	1	2	A.36	0	76
77	0.0983449	1	1	2	A.37	0	77
78	0.99929	1	1	2	A.38	0	78
79	0.0459154	1	1	2	A.39	0	79
80	0.687987	1	1	2	A.40	0	80
81	0.0503735	1	1	3	A.1	0	81
82	0.905624	1	1	3	A.2	1	82
83	0.80161	1	1	3	A.3	0	83
84	0.798841	1	1	3	A.4	0	84
85	0.575105	1	1	3	A.5	0	85
86	0.657776	1	1	3	A.6	0	86
87	0.409597	1	1	3	A.7	0	87
88	0.676015	1	1	3	A.8	0	88
89	0.903713	1	1	3	A.9	0	89
90	0.150062	1	1	3	A.10	0	90
91	0.785449	1	1	3	A.11	0	91
92	0.73973	1	1	3	A.12	0	92
93	0.38298	1	1	3	A.13	0	93
94	0.222412	1	1	3	A.14	0	94
95	0.581533	1	1	3	A.15	0	95
96	0.295508	1	1	3	A.16	0	96
97	0.972281	1	1	3	A.17	1	97
98	0.561847	1	1	3	A.18	0	98
99	0.54858	1	1	3	A.19	0	99
100	0.731614	1	1	3	A.20	0	100
101	0.121625	1	1	3	A.21	0	101
102	0.637785	1	1	3	A.22	0	102
103	0.60537	1	1	3	A.23	1	103
104	0.437219	1	1	3	A.24	0	104
105	0.0327448	1	1	3	A.25	0	105
106	0.359426	1	1	3	A.26	0	106
107	0.822293	1	1	3	A.27	0	107
108	0.536404	1	1	3	A.28	0	108
109	0.765603	1	1	3	A.29	0	109
110	0.965894	1	1	3	A.30	0	110
111	0.873339	1	1	3	A.31	0	111
112	0.835668	1	1	3	A.32	0	112
113	0.655388	1	1	3	A.33	0	113
114	0.175442	1	1	3	A.34	0	114
115	0.440158	1	1	3	A.35	1	115
116	0.0373549	1	1	3	A.36	0	116
117	0.0812005	1	1	3	A.37	0	117
118	0.573252	1	1	3	A.38	0	118
119	0.821953	1	1	3	A.39	0	119
120	0.386066	1	1	3	A.40	0	120
121	0.193773	1	1	4	A.1	0	121
122	0.456654	1	1	4	A.2	0	122
123	0.954509	1	1	4	A.3	0	123
124	0.4641	1	1	4	A.4	0	124
125	0.34563	1	1	4	A.5	0	125
126	0.926148	1	1	4	A.6	0	126
127	0.216635	1	1	4	A.7	0	127
128	0.0962627	1	1	4	A.8	0	128
129	0.7614	1	1	4	A.9	0	129
130	0.557971	1	1	4	A.10	0	130
131	0.898408	1	1	4	A.11	0	131
132	0.0216739	1	1	4	A.12	0	132
133	0.071339	1	1	4	A.13	0	133
134	0.36214	1	1	4	A.14	0	134
135	0.569735	1	1	4	A.15	0	135
136	0.926135	1	1	4	A.16	0	136
137	0.564137	1	1	4	A.17	0
138	0.37036	1	1	4	A.18	0
139	0.870404	1	1	4	A.19	0
140	0.20406	1	1	4	A.20	0
141	0.516124	1	1	4	A.21	1
142	0.335902	1	1	4	A.22	0
143	0.354101	1	1	4	A.23	0
144	0.574987	1	1	4	A.24	0
145	0.406636	1	1	4	A.25	0
146	0.568673	1	1	4	A.26	0
147	0.193502	1	1	4	A.27	0
148	0.580598	1	1	4	A.28	0
149	0.339648	1	1	4	A.29	0
150	0.910504	1	1	4	A.30	0
151	0.511278	1	1	4	A.31	0
152	0.545861	1	1	4	A.32	0
153	0.606899	1	1	4	A.33	0
154	0.179276	1	1	4	A.34	0
155	0.316095	1	1	4	A.35	0
156	0.095439	1	1	4	A.36	0
157	0.0424598	1	1	4	A.37	0
158	0.882961	1	1	4	A.38	0
159	0.839258	1	1	4	A.39	0
160	0.902313	1	1	4	A.40	0
161	0.449054	1	2	1	B.1	0				0	0	7
162	0.763309	1	2	1	B.2	0				0	0
163	0.898777	1	2	1	B.3	0				0	0
164	0.368723	1	2	1	B.4	0				0	0
165	0.722398	1	2	1	B.5	0				1	1
166	0.734305	1	2	1	B.6	0				0	0
167	0.939219	1	2	1	B.7	0				0	0
168	0.810982	1	2	1	B.8	0				0	0
169	0.8238	1	2	1	B.9	0				0	0
170	0.482594	1	2	1	B.10	0				1	1
171	0.80204	1	2	1	B.11	0				0	0
172	0.01484	1	2	1	B.12	0				0	0
173	0.178261	1	2	1	B.13	0				0	0
174	0.249942	1	2	1	B.14	0				0	0
175	0.00861779	1	2	1	B.15	0				1	1
176	0.516652	1	2	1	B.16	0				0	0
177	0.972985	1	2	1	B.17	0				0	0
178	0.433485	1	2	1	B.18	0				0	0
179	0.688704	1	2	1	B.19	0				0	0
180	0.526105	1	2	1	B.20	0				0	0
181	0.314311	1	2	1	B.21	0				0	0
182	0.928643	1	2	1	B.22	0				0	0
183	0.4183	1	2	1	B.23	0				0	0
184	0.860984	1	2	1	B.24	1				1	1
185	0.419079	1	2	1	B.25	0				0	0
186	0.0227824	1	2	1	B.26	0				0	0
187	0.699669	1	2	1	B.27	0				0	0
188	0.468225	1	2	1	B.28	0				0	0
189	0.190862	1	2	1	B.29	0				0	0
190	0.286651	1	2	1	B.30	0				0	0
191	0.366524	1	2	1	B.31	0				0	0
192	0.306992	1	2	1	B.32	1				1	1
193	0.879889	1	2	1	B.33	0				1	1
194	0.509072	1	2	1	B.34	0				0	0
195	0.409447	1	2	1	B.35	0				0	0
196	0.75725	1	2	1	B.36	0				0	0
197	0.269719	1	2	1	B.37	0				0	0
198	0.710061	1	2	1	B.38	0				0	0
199	0.830249	1	2	1	B.39	1				1	1
200	0.786838	1	2	1	B.40	0				0	0
201	0.780345	1	2	2	B.1	0
202	0.0952293	1	2	2	B.2	0
203	0.664515	1	2	2	B.3	0
204	0.702179	1	2	2	B.4	0
205	0.320935	1	2	2	B.5	0
206	0.876057	1	2	2	B.6	0
207	0.347659	1	2	2	B.7	0
208	0.571573	1	2	2	B.8	0
209	0.0448892	1	2	2	B.9	0
210	0.284938	1	2	2	B.10	1
211	0.109966	1	2	2	B.11	0
212	0.923261	1	2	2	B.12	0
213	0.112835	1	2	2	B.13	0
214	0.0337647	1	2	2	B.14	0
215	0.677712	1	2	2	B.15	0
216	0.447278	1	2	2	B.16	0
217	0.338037	1	2	2	B.17	0
218	0.046235	1	2	2	B.18	0
219	0.137499	1	2	2	B.19	0
220	0.667206	1	2	2	B.20	0
221	0.48713	1	2	2	B.21	0
222	0.325447	1	2	2	B.22	0
223	0.200479	1	2	2	B.23	0
224	0.979144	1	2	2	B.24	0
225	0.255524	1	2	2	B.25	0
226	0.800374	1	2	2	B.26	0
227	0.72938	1	2	2	B.27	0
228	0.574777	1	2	2	B.28	0
229	0.543957	1	2	2	B.29	0
230	0.986871	1	2	2	B.30	0
231	0.900727	1	2	2	B.31	0
232	0.0305015	1	2	2	B.32	0
233	0.0533551	1	2	2	B.33	0
234	0.905302	1	2	2	B.34	0
235	0.837764	1	2	2	B.35	0
236	0.0472768	1	2	2	B.36	0
237	0.0180386	1	2	2	B.37	0
238	0.675568	1	2	2	B.38	0
239	0.538702	1	2	2	B.39	0
240	0.855784	1	2	2	B.40	0
241	0.371734	1	2	3	B.1	0
242	0.201898	1	2	3	B.2	0
243	0.465688	1	2	3	B.3	0
244	0.139449	1	2	3	B.4	0
245	0.741896	1	2	3	B.5	1
246	0.890191	1	2	3	B.6	0
247	0.0392197	1	2	3	B.7	0
248	0.574095	1	2	3	B.8	0
249	0.182961	1	2	3	B.9	0
250	0.239445	1	2	3	B.10	0
251	0.396812	1	2	3	B.11	0
252	0.509961	1	2	3	B.12	0
253	0.801166	1	2	3	B.13	0
254	0.701302	1	2	3	B.14	0
255	0.516454	1	2	3	B.15	0
256	0.400586	1	2	3	B.16	0
257	0.382936	1	2	3	B.17	0
258	0.0010285	1	2	3	B.18	0
259	0.276743	1	2	3	B.19	0
260	0.129894	1	2	3	B.20	0
261	0.808442	1	2	3	B.21	0
262	0.689475	1	2	3	B.22	0
263	0.121212	1	2	3	B.23	0
264	0.284281	1	2	3	B.24	0
265	0.200606	1	2	3	B.25	0
266	0.953131	1	2	3	B.26	0
267	0.346532	1	2	3	B.27	0
268	0.535311	1	2	3	B.28	0
269	0.931543	1	2	3	B.29	0
270	0.328267	1	2	3	B.30	0
271	0.553764	1	2	3	B.31	0
272	0.0570098	1	2	3	B.32	0
273	0.59547	1	2	3	B.33	0
274	0.447736	1	2	3	B.34	0
275	0.143041	1	2	3	B.35	0
276	0.0547497	1	2	3	B.36	0
277	0.324349	1	2	3	B.37	0
278	0.237618	1	2	3	B.38	0
279	0.657725	1	2	3	B.39	0
280	0.933767	1	2	3	B.40	0
281	0.976448	1	2	4	B.1	0
282	0.491833	1	2	4	B.2	0
283	0.263018	1	2	4	B.3	0
284	0.928757	1	2	4	B.4	0
285	0.494142	1	2	4	B.5	0
286	0.118855	1	2	4	B.6	0
287	0.334822	1	2	4	B.7	0
288	0.491056	1	2	4	B.8	0
289	0.798917	1	2	4	B.9	0
290	0.715146	1	2	4	B.10	0
291	0.403529	1	2	4	B.11	0
292	0.550847	1	2	4	B.12	0
293	0.141712	1	2	4	B.13	0
294	0.701145	1	2	4	B.14	0
295	0.380514	1	2	4	B.15	1
296	0.184984	1	2	4	B.16	0
297	0.0125396	1	2	4	B.17	0
298	0.0635139	1	2	4	B.18	0
299	0.823739	1	2	4	B.19	0
300	0.62297	1	2	4	B.20	0
301	0.89651	1	2	4	B.21	0
302	0.82557	1	2	4	B.22	0
303	0.486234	1	2	4	B.23	0
304	0.74782	1	2	4	B.24	0
305	0.435706	1	2	4	B.25	0
306	0.434061	1	2	4	B.26	0
307	0.016109	1	2	4	B.27	0
308	0.789263	1	2	4	B.28	0
309	0.170066	1	2	4	B.29	0
310	0.742644	1	2	4	B.30	0
311	0.939784	1	2	4	B.31	0
312	0.0298781	1	2	4	B.32	0
313	0.218814	1	2	4	B.33	1
314	0.531874	1	2	4	B.34	0
315	0.0706252	1	2	4	B.35	0
316	0.911635	1	2	4	B.36	0
317	0.81973	1	2	4	B.37	0
318	0.814347	1	2	4	B.38	0
319	0.100375	1	2	4	B.39	0
320	0.470349	1	2	4	B.40	0
321	0.268668	2	1	1	C.1	1				1	1	8
322	0.423332	2	1	1	C.2	0				0	0
323	0.679048	2	1	1	C.3	0				0	0
324	0.177563	2	1	1	C.4	0				0	0
325	0.76924	2	1	1	C.5	0				1	1
326	0.489199	2	1	1	C.6	0				0	0
327	0.482995	2	1	1	C.7	1				1	1
328	0.710212	2	1	1	C.8	0				0	0
329	0.545517	2	1	1	C.9	0				1	1
330	0.171208	2	1	1	C.10	0				1	1
331	0.556991	2	1	1	C.11	0				1	1
332	0.453833	2	1	1	C.12	0				0	0
333	0.747712	2	1	1	C.13	0				0	0
334	0.214356	2	1	1	C.14	0				0	0
335	0.269808	2	1	1	C.15	0				0	0
336	0.908843	2	1	1	C.16	0				0	0
337	0.896878	2	1	1	C.17	0				0	0
338	0.350046	2	1	1	C.18	0				0	0
339	0.826094	2	1	1	C.19	0				0	0
340	0.153166	2	1	1	C.20	0				0	0
341	0.23681	2	1	1	C.21	0				0	0
342	0.377938	2	1	1	C.22	0				0	0
343	0.00520975	2	1	1	C.23	0				0	0
344	0.721756	2	1	1	C.24	0				0	0
345	0.721203	2	1	1	C.25	0				0	0
346	0.156192	2	1	1	C.26	0				0	0
347	0.252658	2	1	1	C.27	1				1	1
348	0.622485	2	1	1	C.28	0				1	1
349	0.961635	2	1	1	C.29	0				0	0
350	0.502369	2	1	1	C.30	0				0	0
351	0.592878	2	1	1	C.31	0				0	0
352	0.622879	2	1	1	C.32	0				0	0
353	0.336483	2	1	1	C.33	0				0	0
354	0.991128	2	1	1	C.34	0				0	0
355	0.320973	2	1	1	C.35	0				0	0
356	0.465754	2	1	1	C.36	0				0	0
357	0.578457	2	1	1	C.37	0				0	0
358	0.583925	2	1	1	C.38	0				0	0
359	0.80516	2	1	1	C.39	0				0	0
360	0.766351	2	1	1	C.40	0				0	0
361	0.545616	2	1	2	C.1	0
362	0.275673	2	1	2	C.2	0
363	0.511728	2	1	2	C.3	0
364	0.835936	2	1	2	C.4	0
365	0.489275	2	1	2	C.5	0
366	0.511937	2	1	2	C.6	0
367	0.714857	2	1	2	C.7	0
368	0.396014	2	1	2	C.8	0
369	0.66875	2	1	2	C.9	0
370	0.87566	2	1	2	C.10	1
371	0.082073	2	1	2	C.11	0
372	0.427038	2	1	2	C.12	0
373	0.761921	2	1	2	C.13	0
374	0.500769	2	1	2	C.14	0
375	0.996107	2	1	2	C.15	0
376	0.248808	2	1	2	C.16	0
377	0.947052	2	1	2	C.17	0
378	0.327214	2	1	2	C.18	0
379	0.129564	2	1	2	C.19	0
380	0.516188	2	1	2	C.20	0
381	0.873389	2	1	2	C.21	0
382	0.144026	2	1	2	C.22	0
383	0.340947	2	1	2	C.23	0
384	0.564338	2	1	2	C.24	0
385	0.685173	2	1	2	C.25	0
386	0.320658	2	1	2	C.26	0
387	0.492576	2	1	2	C.27	0
388	0.518715	2	1	2	C.28	0
389	0.631935	2	1	2	C.29	0
390	0.748941	2	1	2	C.30	0
391	0.324848	2	1	2	C.31	0
392	0.567045	2	1	2	C.32	0
393	0.823942	2	1	2	C.33	0
394	0.69591	2	1	2	C.34	0
395	0.878032	2	1	2	C.35	0
396	0.63806	2	1	2	C.36	0
397	0.564235	2	1	2	C.37	0
398	0.173246	2	1	2	C.38	0
399	0.875195	2	1	2	C.39	0
400	0.458298	2	1	2	C.40	0
401	0.00764111	2	1	3	C.1	0
402	0.369638	2	1	3	C.2	0
403	0.678115	2	1	3	C.3	0
404	0.0430032	2	1	3	C.4	0
405	0.532156	2	1	3	C.5	0
406	0.225166	2	1	3	C.6	0
407	0.940146	2	1	3	C.7	0
408	0.89136	2	1	3	C.8	0
409	0.380346	2	1	3	C.9	0
410	0.975649	2	1	3	C.10	0
411	0.146823	2	1	3	C.11	0
412	0.155581	2	1	3	C.12	0
413	0.169699	2	1	3	C.13	0
414	0.479399	2	1	3	C.14	0
415	0.0224417	2	1	3	C.15	0
416	0.0288793	2	1	3	C.16	0
417	0.515172	2	1	3	C.17	0
418	0.848181	2	1	3	C.18	0
419	0.580142	2	1	3	C.19	0
420	0.892658	2	1	3	C.20	0
421	0.273876	2	1	3	C.21	0
422	0.510795	2	1	3	C.22	0
423	0.410652	2	1	3	C.23	0
424	0.731746	2	1	3	C.24	0
425	0.671077	2	1	3	C.25	0
426	0.889099	2	1	3	C.26	0
427	0.0885741	2	1	3	C.27	0
428	0.183058	2	1	3	C.28	1
429	0.793975	2	1	3	C.29	0
430	0.135286	2	1	3	C.30	0
431	0.867082	2	1	3	C.31	0
432	0.47318	2	1	3	C.32	0
433	0.195284	2	1	3	C.33	0
434	0.785674	2	1	3	C.34	0
435	0.711927	2	1	3	C.35	0
436	0.314253	2	1	3	C.36	0
437	0.330301	2	1	3	C.37	0
438	0.941447	2	1	3	C.38	0
439	0.947136	2	1	3	C.39	0
440	0.720398	2	1	3	C.40	0
441	0.31402	2	1	4	C.1	0
442	0.535768	2	1	4	C.2	0
443	0.316946	2	1	4	C.3	0
444	0.810523	2	1	4	C.4	0
445	0.513211	2	1	4	C.5	1
446	0.620515	2	1	4	C.6	0
447	0.621094	2	1	4	C.7	0
448	0.265941	2	1	4	C.8	0
449	0.202154	2	1	4	C.9	1
450	0.298341	2	1	4	C.10	0
451	0.414462	2	1	4	C.11	1
452	0.00276717	2	1	4	C.12	0
453	0.44634	2	1	4	C.13	0
454	0.972512	2	1	4	C.14	0
455	0.077603	2	1	4	C.15	0
456	0.53285	2	1	4	C.16	0
457	0.133323	2	1	4	C.17	0
458	0.841737	2	1	4	C.18	0
459	0.294483	2	1	4	C.19	0
460	0.495489	2	1	4	C.20	0
461	0.686269	2	1	4	C.21	0
462	0.682435	2	1	4	C.22	0
463	0.214321	2	1	4	C.23	0
464	0.265457	2	1	4	C.24	0
465	0.703492	2	1	4	C.25	0
466	0.538094	2	1	4	C.26	0
467	0.737364	2	1	4	C.27	0
468	0.965911	2	1	4	C.28	0
469	0.833575	2	1	4	C.29	0
470	0.257163	2	1	4	C.30	0
471	0.471659	2	1	4	C.31	0
472	0.967002	2	1	4	C.32	0
473	0.509537	2	1	4	C.33	0
474	0.459692	2	1	4	C.34	0
475	0.649306	2	1	4	C.35	0
476	0.544928	2	1	4	C.36	0
477	0.494036	2	1	4	C.37	0
478	0.610825	2	1	4	C.38	0
479	0.955964	2	1	4	C.39	0
480	0.206334	2	1	4	C.40	0
481	0.485775	2	2	1	D.1	0				0	0	7
482	0.591395	2	2	1	D.2	0				0	0
483	0.799454	2	2	1	D.3	0				1	1
484	0.340852	2	2	1	D.4	0				0	0
485	0.931967	2	2	1	D.5	0				0	0
486	0.877689	2	2	1	D.6	0				1	1
487	0.932973	2	2	1	D.7	0				0	0
488	0.223947	2	2	1	D.8	0				0	0
489	0.851651	2	2	1	D.9	0				0	0
490	0.948794	2	2	1	D.10	0				1	1
491	0.0117029	2	2	1	D.11	0				0	0
492	0.985502	2	2	1	D.12	0				1	1
493	0.550539	2	2	1	D.13	0				0	0
494	0.99139	2	2	1	D.14	0				0	0
495	0.228112	2	2	1	D.15	0				0	0
496	0.904239	2	2	1	D.16	0				0	0
497	0.839565	2	2	1	D.17	0				0	0
498	0.245169	2	2	1	D.18	0				0	0
499	0.772169	2	2	1	D.19	0				0	0
500	0.10568	2	2	1	D.20	0				0	0
501	0.941955	2	2	1	D.21	0				0	0
502	0.083913	2	2	1	D.22	0				0	0
503	0.700288	2	2	1	D.23	0				0	0
504	0.26603	2	2	1	D.24	0				1	1
505	0.836448	2	2	1	D.25	0				0	0
506	0.308343	2	2	1	D.26	0				0	0
507	0.223415	2	2	1	D.27	0				0	0
508	0.904225	2	2	1	D.28	0				0	0
509	0.0723174	2	2	1	D.29	0				0	0
510	0.278531	2	2	1	D.30	0				0	0
511	0.813093	2	2	1	D.31	1				1	1
512	0.263239	2	2	1	D.32	0				0	0
513	0.881162	2	2	1	D.33	0				0	0
514	0.0301759	2	2	1	D.34	0				0	0
515	0.200987	2	2	1	D.35	0				0	0
516	0.312799	2	2	1	D.36	0				1	1
517	0.115164	2	2	1	D.37	0				0	0
518	0.345202	2	2	1	D.38	0				0	0
519	0.813888	2	2	1	D.39	0				0	0
520	0.68279	2	2	1	D.40	0				0	0
521	0.708822	2	2	2	D.1	0
522	0.800467	2	2	2	D.2	0
523	0.872109	2	2	2	D.3	0
524	0.362909	2	2	2	D.4	0
525	0.419478	2	2	2	D.5	0
526	0.669122	2	2	2	D.6	0
527	0.488731	2	2	2	D.7	0
528	0.531449	2	2	2	D.8	0
529	0.279297	2	2	2	D.9	0
530	0.848058	2	2	2	D.10	0
531	0.449894	2	2	2	D.11	0
532	0.236803	2	2	2	D.12	0
533	0.536059	2	2	2	D.13	0
534	0.0583067	2	2	2	D.14	0
535	0.826376	2	2	2	D.15	0
536	0.02883	2	2	2	D.16	0
537	0.402317	2	2	2	D.17	0
538	0.762027	2	2	2	D.18	0
539	0.277129	2	2	2	D.19	0
540	0.0831934	2	2	2	D.20	0
541	0.268151	2	2	2	D.21	0
542	0.145345	2	2	2	D.22	0
543	0.149981	2	2	2	D.23	0
544	0.633234	2	2	2	D.24	0
545	0.0580939	2	2	2	D.25	0
546	0.420336	2	2	2	D.26	0
547	0.36478	2	2	2	D.27	0
548	0.247018	2	2	2	D.28	0
549	0.580128	2	2	2	D.29	0
550	0.791286	2	2	2	D.30	0
551	0.230063	2	2	2	D.31	0
552	0.0125623	2	2	2	D.32	0
553	0.394466	2	2	2	D.33	0
554	0.687946	2	2	2	D.34	0
555	0.10253	2	2	2	D.35	0
556	0.944031	2	2	2	D.36	0
557	0.365504	2	2	2	D.37	0
558	0.156016	2	2	2	D.38	0
559	0.366847	2	2	2	D.39	0
560	0.305037	2	2	2	D.40	0
561	0.823974	2	2	3	D.1	0
562	0.179029	2	2	3	D.2	0
563	0.945594	2	2	3	D.3	1
564	0.817581	2	2	3	D.4	0
565	0.466649	2	2	3	D.5	0
566	0.204066	2	2	3	D.6	1
567	0.924913	2	2	3	D.7	0
568	0.906444	2	2	3	D.8	0
569	0.564558	2	2	3	D.9	0
570	0.470875	2	2	3	D.10	0
571	0.215924	2	2	3	D.11	0
572	0.880841	2	2	3	D.12	0
573	0.0236202	2	2	3	D.13	0
574	0.428994	2	2	3	D.14	0
575	0.790928	2	2	3	D.15	0
576	0.271866	2	2	3	D.16	0
577	0.46499	2	2	3	D.17	0
578	0.824702	2	2	3	D.18	0
579	0.061089	2	2	3	D.19	0
580	0.105527	2	2	3	D.20	0
581	0.788472	2	2	3	D.21	0
582	0.937882	2	2	3	D.22	0
583	0.368744	2	2	3	D.23	0
584	0.231292	2	2	3	D.24	1
585	0.397146	2	2	3	D.25	0
586	0.807799	2	2	3	D.26	0
587	0.0536872	2	2	3	D.27	0
588	0.10005	2	2	3	D.28	0
589	0.487616	2	2	3	D.29	0
590	0.459224	2	2	3	D.30	0
591	0.182377	2	2	3	D.31	0
592	0.737265	2	2	3	D.32	0
593	0.870295	2	2	3	D.33	0
594	0.614754	2	2	3	D.34	0
595	0.166955	2	2	3	D.35	0
596	0.591458	2	2	3	D.36	0
597	0.855856	2	2	3	D.37	0
598	0.877619	2	2	3	D.38	0
599	0.664571	2	2	3	D.39	0
600	0.397791	2	2	3	D.40	0
601	0.87685	2	2	4	D.1	0
602	0.913033	2	2	4	D.2	0
603	0.000857732	2	2	4	D.3	0
604	0.894398	2	2	4	D.4	0
605	0.244115	2	2	4	D.5	0
606	0.584004	2	2	4	D.6	0
607	0.491088	2	2	4	D.7	0
608	0.645618	2	2	4	D.8	0
609	0.456091	2	2	4	D.9	0
610	0.494051	2	2	4	D.10	1
611	0.0116972	2	2	4	D.11	0
612	0.833037	2	2	4	D.12	1
613	0.747356	2	2	4	D.13	0
614	0.607652	2	2	4	D.14	0
615	0.968451	2	2	4	D.15	0
616	0.587313	2	2	4	D.16	0
617	0.929984	2	2	4	D.17	0
618	0.424765	2	2	4	D.18	0
619	0.601569	2	2	4	D.19	0
620	0.794548	2	2	4	D.20	0
621	0.738017	2	2	4	D.21	0
622	0.920366	2	2	4	D.22	0
623	0.329371	2	2	4	D.23	0
624	0.455598	2	2	4	D.24	0
625	0.381568	2	2	4	D.25	0
626	0.419377	2	2	4	D.26	0
627	0.120943	2	2	4	D.27	0
628	0.0363203	2	2	4	D.28	0
629	0.208297	2	2	4	D.29	0
630	0.183889	2	2	4	D.30	0
631	0.0266986	2	2	4	D.31	0
632	0.0985169	2	2	4	D.32	0
633	0.0662354	2	2	4	D.33	0
634	0.248794	2	2	4	D.34	0
635	0.14349	2	2	4	D.35	0
636	0.615578	2	2	4	D.36	1
637	0.695112	2	2	4	D.37	0
638	0.556183	2	2	4	D.38	0
639	0.467882	2	2	4	D.39	0
640	0.359651	2	2	4	D.40	0
641	0.877905	3	1	1	E.1	0				1	1	15
642	0.298416	3	1	1	E.2	0				0	0
643	0.739707	3	1	1	E.3	0				1	1
644	0.167015	3	1	1	E.4	0				0	0
645	0.500858	3	1	1	E.5	0				0	0
646	0.840534	3	1	1	E.6	0				0	0
647	0.234283	3	1	1	E.7	0				0	0
648	0.875833	3	1	1	E.8	0				0	0
649	0.063215	3	1	1	E.9	0				0	0
650	0.939892	3	1	1	E.10	1				2	1
651	0.227341	3	1	1	E.11	1				1	1
652	0.391282	3	1	1	E.12	0				2	1
653	0.406214	3	1	1	E.13	0				0	0
654	0.471944	3	1	1	E.14	0				2	1
655	0.842321	3	1	1	E.15	0				0	0
656	0.0619941	3	1	1	E.16	0				1	1
657	0.171225	3	1	1	E.17	0				0	0
658	0.215833	3	1	1	E.18	0				0	0
659	0.910069	3	1	1	E.19	0				0	0
660	0.600646	3	1	1	E.20	0				0	0
661	0.341382	3	1	1	E.21	0				0	0
662	0.545037	3	1	1	E.22	1				1	1
663	0.0654603	3	1	1	E.23	0				0	0
664	0.122254	3	1	1	E.24	0				1	1
665	0.733654	3	1	1	E.25	0				0	0
666	0.0709691	3	1	1	E.26	0				1	1
667	0.429809	3	1	1	E.27	0				0	0
668	0.574002	3	1	1	E.28	0				2	1
669	0.266254	3	1	1	E.29	0				0	0
670	0.440022	3	1	1	E.30	0				0	0
671	0.672851	3	1	1	E.31	0				0	0
672	0.521744	3	1	1	E.32	1				1	1
673	0.566091	3	1	1	E.33	0				0	0
674	0.0946832	3	1	1	E.34	1				1	1
675	0.343258	3	1	1	E.35	0				0	0
676	0.0439813	3	1	1	E.36	0				1	1
677	0.649352	3	1	1	E.37	0				0	0
678	0.179009	3	1	1	E.38	0				0	0
679	0.0409981	3	1	1	E.39	1				2	1
680	0.330251	3	1	1	E.40	0				0	0
681	0.946262	3	1	2	E.1	0
682	0.410051	3	1	2	E.2	0
683	0.595168	3	1	2	E.3	0
684	0.308981	3	1	2	E.4	0
685	0.498593	3	1	2	E.5	0
686	0.486865	3	1	2	E.6	0
687	0.0729673	3	1	2	E.7	0
688	0.00125942	3	1	2	E.8	0
689	0.861148	3	1	2	E.9	0
690	0.633601	3	1	2	E.10	0
691	0.292678	3	1	2	E.11	0
692	0.360077	3	1	2	E.12	0
693	0.335099	3	1	2	E.13	0
694	0.664738	3	1	2	E.14	0
695	0.866238	3	1	2	E.15	0
696	0.37737	3	1	2	E.16	1
697	0.591188	3	1	2	E.17	0
698	0.338467	3	1	2	E.18	0
699	0.800242	3	1	2	E.19	0
700	0.897376	3	1	2	E.20	0
701	0.0269635	3	1	2	E.21	0
702	0.481472	3	1	2	E.22	0
703	0.0452806	3	1	2	E.23	0
704	0.982102	3	1	2	E.24	0
705	0.00360602	3	1	2	E.25	0
706	0.78638	3	1	2	E.26	0
707	0.941744	3	1	2	E.27	0
708	0.185113	3	1	2	E.28	0
709	0.534844	3	1	2	E.29	0
710	0.318306	3	1	2	E.30	0
711	0.209777	3	1	2	E.31	0
712	0.311237	3	1	2	E.32	0
713	0.738835	3	1	2	E.33	0
714	0.894294	3	1	2	E.34	0
715	0.565132	3	1	2	E.35	0
716	0.593568	3	1	2	E.36	1
717	0.615875	3	1	2	E.37	0
718	0.343288	3	1	2	E.38	0
719	0.461345	3	1	2	E.39	0
720	0.0839725	3	1	2	E.40	0
721	0.112831	3	1	3	E.1	0
722	0.886728	3	1	3	E.2	0
723	0.0119438	3	1	3	E.3	0
724	0.721094	3	1	3	E.4	0
725	0.534083	3	1	3	E.5	0
726	0.391	3	1	3	E.6	0
727	0.308817	3	1	3	E.7	0
728	0.898715	3	1	3	E.8	0
729	0.445487	3	1	3	E.9	0
730	0.0749734	3	1	3	E.10	0
731	0.185569	3	1	3	E.11	0
732	0.615834	3	1	3	E.12	1
733	0.628033	3	1	3	E.13	0
734	0.108155	3	1	3	E.14	1
735	0.896452	3	1	3	E.15	0
736	0.161552	3	1	3	E.16	0
737	0.915337	3	1	3	E.17	0
738	0.765572	3	1	3	E.18	0
739	0.13273	3	1	3	E.19	0
740	0.2481	3	1	3	E.20	0
741	0.709705	3	1	3	E.21	0
742	0.580313	3	1	3	E.22	0
743	0.440702	3	1	3	E.23	0
744	0.772375	3	1	3	E.24	0
745	0.728459	3	1	3	E.25	0
746	0.361859	3	1	3	E.26	0
747	0.563435	3	1	3	E.27	0
748	0.0506857	3	1	3	E.28	1
749	0.866959	3	1	3	E.29	0
750	0.127978	3	1	3	E.30	0
751	0.331381	3	1	3	E.31	0
752	0.752147	3	1	3	E.32	0
753	0.408141	3	1	3	E.33	0
754	0.438929	3	1	3	E.34	0
755	0.538784	3	1	3	E.35	0
756	0.847959	3	1	3	E.36	0
757	0.321428	3	1	3	E.37	0
758	0.845022	3	1	3	E.38	0
759	0.0672496	3	1	3	E.39	0
760	0.941702	3	1	3	E.40	0
761	0.622486	3	1	4	E.1	1
762	0.887814	3	1	4	E.2	0
763	0.953135	3	1	4	E.3	1
764	0.463611	3	1	4	E.4	0
765	0.849632	3	1	4	E.5	0
766	0.739277	3	1	4	E.6	0
767	0.944828	3	1	4	E.7	0
768	0.635201	3	1	4	E.8	0
769	0.604007	3	1	4	E.9	0
770	0.706234	3	1	4	E.10	1
771	0.717345	3	1	4	E.11	0
772	0.807137	3	1	4	E.12	1
773	0.862818	3	1	4	E.13	0
774	0.771507	3	1	4	E.14	1
775	0.134146	3	1	4	E.15	0
776	0.817563	3	1	4	E.16	0
777	0.175942	3	1	4	E.17	0
778	0.0430605	3	1	4	E.18	0
779	0.636114	3	1	4	E.19	0
780	0.828655	3	1	4	E.20	0
781	0.467922	3	1	4	E.21	0
782	0.991836	3	1	4	E.22	0
783	0.515454	3	1	4	E.23	0
784	0.219979	3	1	4	E.24	1
785	0.89083	3	1	4	E.25	0
786	0.902907	3	1	4	E.26	1
787	0.536883	3	1	4	E.27	0
788	0.333369	3	1	4	E.28	1
789	0.625549	3	1	4	E.29	0
790	0.560941	3	1	4	E.30	0
791	0.187539	3	1	4	E.31	0
792	0.76468	3	1	4	E.32	0
793	0.904809	3	1	4	E.33	0
794	0.694803	3	1	4	E.34	0
795	0.973146	3	1	4	E.35	0
796	0.859192	3	1	4	E.36	0
797	0.245951	3	1	4	E.37	0
798	0.48031	3	1	4	E.38	0
799	0.0653507	3	1	4	E.39	1
800	0.317667	3	1	4	E.40	0
801	0.866319	3	2	1	F.1	0				0	0	7
802	0.315397	3	2	1	F.2	1				1	1
803	0.137801	3	2	1	F.3	0				1	1
804	0.0260862	3	2	1	F.4	0				0	0
805	0.314976	3	2	1	F.5	0				0	0
806	0.822225	3	2	1	F.6	0				0	0
807	0.62105	3	2	1	F.7	0				0	0
808	0.178984	3	2	1	F.8	0				0	0
809	0.266618	3	2	1	F.9	0				0	0
810	0.354408	3	2	1	F.10	0				1	1
811	0.0464599	3	2	1	F.11	0				0	0
812	0.170093	3	2	1	F.12	0				0	0
813	0.511603	3	2	1	F.13	0				0	0
814	0.0345453	3	2	1	F.14	0				0	0
815	0.555605	3	2	1	F.15	0				0	0
816	0.536392	3	2	1	F.16	0				0	0
817	0.727114	3	2	1	F.17	0				0	0
818	0.572341	3	2	1	F.18	0				0	0
819	0.703549	3	2	1	F.19	0				0	0
820	0.328669	3	2	1	F.20	0				0	0
821	0.556488	3	2	1	F.21	0				0	0
822	0.319115	3	2	1	F.22	0				1	1
823	0.216597	3	2	1	F.23	0				0	0
824	0.349473	3	2	1	F.24	0				0	0
825	0.00991451	3	2	1	F.25	0				0	0
826	0.596457	3	2	1	F.26	0				0	0
827	0.0940778	3	2	1	F.27	0				0	0
828	0.64495	3	2	1	F.28	0				0	0
829	0.0881473	3	2	1	F.29	0				0	0
830	0.0417032	3	2	1	F.30	0				0	0
831	0.647325	3	2	1	F.31	0				0	0
832	0.202064	3	2	1	F.32	1				1	1
833	0.0733022	3	2	1	F.33	1				1	1
834	0.0566799	3	2	1	F.34	0				0	0
835	0.84556	3	2	1	F.35	0				0	0
836	0.833778	3	2	1	F.36	0				0	0
837	0.226386	3	2	1	F.37	1				1	1
838	0.278828	3	2	1	F.38	0				0	0
839	0.11291	3	2	1	F.39	0				0	0
840	0.961099	3	2	1	F.40	0				0	0
841	0.956101	3	2	2	F.1	0
842	0.36949	3	2	2	F.2	0
843	0.364189	3	2	2	F.3	1
844	0.470486	3	2	2	F.4	0
845	0.571429	3	2	2	F.5	0
846	0.841708	3	2	2	F.6	0
847	0.104595	3	2	2	F.7	0
848	0.994483	3	2	2	F.8	0
849	0.180398	3	2	2	F.9	0
850	0.919832	3	2	2	F.10	1
851	0.91741	3	2	2	F.11	0
852	0.428652	3	2	2	F.12	0
853	0.945243	3	2	2	F.13	0
854	0.320573	3	2	2	F.14	0
855	0.0510275	3	2	2	F.15	0
856	0.308928	3	2	2	F.16	0
857	0.0745878	3	2	2	F.17	0
858	0.956417	3	2	2	F.18	0
859	0.145387	3	2	2	F.19	0
860	0.560664	3	2	2	F.20	0
861	0.392942	3	2	2	F.21	0
862	0.743273	3	2	2	F.22	0
863	0.90738	3	2	2	F.23	0
864	0.0351632	3	2	2	F.24	0
865	0.829186	3	2	2	F.25	0
866	0.314038	3	2	2	F.26	0
867	0.194081	3	2	2	F.27	0
868	0.45556	3	2	2	F.28	0
869	0.0297493	3	2	2	F.29	0
870	0.161167	3	2	2	F.30	0
871	0.660948	3	2	2	F.31	0
872	0.438359	3	2	2	F.32	0
873	0.524854	3	2	2	F.33	0
874	0.216095	3	2	2	F.34	0
875	0.366689	3	2	2	F.35	0
876	0.46072	3	2	2	F.36	0
877	0.945348	3	2	2	F.37	0
878	0.814721	3	2	2	F.38	0
879	0.0758179	3	2	2	F.39	0
880	0.121251	3	2	2	F.40	0
881	0.653697	3	2	3	F.1	0
882	0.329145	3	2	3	F.2	0
883	0.457407	3	2	3	F.3	0
884	0.145501	3	2	3	F.4	0
885	0.732117	3	2	3	F.5	0
886	0.28873	3	2	3	F.6	0
887	0.474488	3	2	3	F.7	0
888	0.448676	3	2	3	F.8	0
889	0.0644011	3	2	3	F.9	0
890	0.369893	3	2	3	F.10	0
891	0.850906	3	2	3	F.11	0
892	0.291795	3	2	3	F.12	0
893	0.603039	3	2	3	F.13	0
894	0.91808	3	2	3	F.14	0
895	0.736186	3	2	3	F.15	0
896	0.230781	3	2	3	F.16	0
897	0.364007	3	2	3	F.17	0
898	0.535708	3	2	3	F.18	0
899	0.514459	3	2	3	F.19	0
900	0.868245	3	2	3	F.20	0
901	0.238454	3	2	3	F.21	0
902	0.128902	3	2	3	F.22	0
903	0.711307	3	2	3	F.23	0
904	0.640005	3	2	3	F.24	0
905	0.891182	3	2	3	F.25	0
906	0.0451538	3	2	3	F.26	0
907	0.530613	3	2	3	F.27	0
908	0.0201454	3	2	3	F.28	0
909	0.614739	3	2	3	F.29	0
910	0.804628	3	2	3	F.30	0
911	0.831565	3	2	3	F.31	0
912	0.261516	3	2	3	F.32	0
913	0.114814	3	2	3	F.33	0
914	0.407575	3	2	3	F.34	0
915	0.0452257	3	2	3	F.35	0
916	0.707707	3	2	3	F.36	0
917	0.049826	3	2	3	F.37	0
918	0.5401	3	2	3	F.38	0
919	0.477691	3	2	3	F.39	0
920	0.661197	3	2	3	F.40	0
921	0.484931	3	2	4	F.1	0
922	0.789531	3	2	4	F.2	0
923	0.489124	3	2	4	F.3	0
924	0.126361	3	2	4	F.4	0
925	0.454684	3	2	4	F.5	0
926	0.309064	3	2	4	F.6	0
927	0.984909	3	2	4	F.7	0
928	0.0785507	3	2	4	F.8	0
929	0.400207	3	2	4	F.9	0
930	0.376634	3	2	4	F.10	0
931	0.729341	3	2	4	F.11	0
932	0.537844	3	2	4	F.12	0
933	0.934363	3	2	4	F.13	0
934	0.467326	3	2	4	F.14	0
935	0.898981	3	2	4	F.15	0
936	0.391529	3	2	4	F.16	0
937	0.352667	3	2	4	F.17	0
938	0.517469	3	2	4	F.18	0
939	0.953859	3	2	4	F.19	0
940	0.224192	3	2	4	F.20	0
941	0.618946	3	2	4	F.21	0
942	0.423209	3	2	4	F.22	1
943	0.846807	3	2	4	F.23	0
944	0.438009	3	2	4	F.24	0
945	0.612935	3	2	4	F.25	0
946	0.967868	3	2	4	F.26	0
947	0.572065	3	2	4	F.27	0
948	0.508312	3	2	4	F.28	0
949	0.97329	3	2	4	F.29	0
950	0.614826	3	2	4	F.30	0
951	0.400671	3	2	4	F.31	0
952	0.905228	3	2	4	F.32	0
953	0.637934	3	2	4	F.33	0
954	0.194164	3	2	4	F.34	0
955	0.762401	3	2	4	F.35	0
956	0.287724	3	2	4	F.36	0
957	0.280869	3	2	4	F.37	0
958	0.115615	3	2	4	F.38	0
959	0.64551	3	2	4	F.39	0
960	0.14155	3	2	4	F.40	0
961	0.841601	4	1	1	G.1	0				0	0	11
962	0.0697379	4	1	1	G.2	0				0	0
963	0.340623	4	1	1	G.3	0				0	0
964	0.314618	4	1	1	G.4	0				0	0
965	0.904668	4	1	1	G.5	0				0	0
966	0.112135	4	1	1	G.6	0				0	0
967	0.853834	4	1	1	G.7	0				0	0
968	0.309365	4	1	1	G.8	0				0	0
969	0.911904	4	1	1	G.9	0				0	0
970	0.486441	4	1	1	G.10	0				1	1
971	0.429005	4	1	1	G.11	0				0	0
972	0.566415	4	1	1	G.12	0				0	0
973	0.706038	4	1	1	G.13	0				1	1
974	0.962083	4	1	1	G.14	0				0	0
975	0.640097	4	1	1	G.15	0				0	0
976	0.894818	4	1	1	G.16	0				0	0
977	0.834531	4	1	1	G.17	0				1	1
978	0.596863	4	1	1	G.18	0				1	1
979	0.907563	4	1	1	G.19	0				0	0
980	0.0990358	4	1	1	G.20	0				0	0
981	0.764512	4	1	1	G.21	0				0	0
982	0.798427	4	1	1	G.22	1				1	1
983	0.967111	4	1	1	G.23	0				0	0
984	0.784219	4	1	1	G.24	0				0	0
985	0.776398	4	1	1	G.25	0				0	0
986	0.0873693	4	1	1	G.26	0				0	0
987	0.900919	4	1	1	G.27	1				1	1
988	0.133085	4	1	1	G.28	0				0	0
989	0.232373	4	1	1	G.29	0				1	1
990	0.682634	4	1	1	G.30	0				0	0
991	0.936289	4	1	1	G.31	0				0	0
992	0.496489	4	1	1	G.32	0				0	0
993	0.350862	4	1	1	G.33	0				0	0
994	0.455297	4	1	1	G.34	0				0	0
995	0.0873133	4	1	1	G.35	0				1	1
996	0.0501178	4	1	1	G.36	0				1	1
997	0.483181	4	1	1	G.37	0				2	1
998	0.0914989	4	1	1	G.38	0				0	0
999	0.758521	4	1	1	G.39	0				0	0
1000	0.806152	4	1	1	G.40	0				1	1
1001	0.095553	4	1	2	G.1	0
1002	0.408775	4	1	2	G.2	0
1003	0.452757	4	1	2	G.3	0
1004	0.630559	4	1	2	G.4	0
1005	0.244152	4	1	2	G.5	0
1006	0.955049	4	1	2	G.6	0
1007	0.880161	4	1	2	G.7	0
1008	0.377041	4	1	2	G.8	0
1009	0.390994	4	1	2	G.9	0
1010	0.119651	4	1	2	G.10	0
1011	0.986612	4	1	2	G.11	0
1012	0.702746	4	1	2	G.12	0
1013	0.489579	4	1	2	G.13	1
1014	0.718685	4	1	2	G.14	0
1015	0.737052	4	1	2	G.15	0
1016	0.343748	4	1	2	G.16	0
1017	0.62122	4	1	2	G.17	0
1018	0.867359	4	1	2	G.18	0
1019	0.864614	4	1	2	G.19	0
1020	0.608018	4	1	2	G.20	0
1021	0.528293	4	1	2	G.21	0
1022	0.621022	4	1	2	G.22	0
1023	0.655459	4	1	2	G.23	0
1024	0.220253	4	1	2	G.24	0
1025	0.199225	4	1	2	G.25	0
1026	0.833917	4	1	2	G.26	0
1027	0.613891	4	1	2	G.27	0
1028	0.181464	4	1	2	G.28	0
1029	0.359595	4	1	2	G.29	1
1030	0.00103482	4	1	2	G.30	0
1031	0.892189	4	1	2	G.31	0
1032	0.542637	4	1	2	G.32	0
1033	0.177898	4	1	2	G.33	0
1034	0.695742	4	1	2	G.34	0
1035	0.0232389	4	1	2	G.35	0
1036	0.665319	4	1	2	G.36	0
1037	0.745918	4	1	2	G.37	1
1038	0.102849	4	1	2	G.38	0
1039	0.819718	4	1	2	G.39	0
1040	0.734549	4	1	2	G.40	0
1041	0.89671	4	1	3	G.1	0
1042	0.761177	4	1	3	G.2	0
1043	0.275741	4	1	3	G.3	0
1044	0.334852	4	1	3	G.4	0
1045	0.191155	4	1	3	G.5	0
1046	0.0328093	4	1	3	G.6	0
1047	0.573967	4	1	3	G.7	0
1048	0.745327	4	1	3	G.8	0
1049	0.340565	4	1	3	G.9	0
1050	0.794918	4	1	3	G.10	0
1051	0.220795	4	1	3	G.11	0
1052	0.637553	4	1	3	G.12	0
1053	0.312858	4	1	3	G.13	0
1054	0.378091	4	1	3	G.14	0
1055	0.396258	4	1	3	G.15	0
1056	0.525853	4	1	3	G.16	0
1057	0.88863	4	1	3	G.17	1
1058	0.726071	4	1	3	G.18	1
1059	0.650125	4	1	3	G.19	0
1060	0.949013	4	1	3	G.20	0
1061	0.192996	4	1	3	G.21	0
1062	0.0959997	4	1	3	G.22	0
1063	0.953291	4	1	3	G.23	0
1064	0.396607	4	1	3	G.24	0
1065	0.450718	4	1	3	G.25	0
1066	0.71245	4	1	3	G.26	0
1067	0.666226	4	1	3	G.27	0
1068	0.350683	4	1	3	G.28	0
1069	0.419313	4	1	3	G.29	0
1070	0.596283	4	1	3	G.30	0
1071	0.693116	4	1	3	G.31	0
1072	0.684793	4	1	3	G.32	0
1073	0.490886	4	1	3	G.33	0
1074	0.708384	4	1	3	G.34	0
1075	0.0125339	4	1	3	G.35	0
1076	0.961288	4	1	3	G.36	0
1077	0.735907	4	1	3	G.37	1
1078	0.222133	4	1	3	G.38	0
1079	0.55496	4	1	3	G.39	0
1080	0.0100268	4	1	3	G.40	1
1081	0.0344485	4	1	4	G.1	0
1082	0.16893	4	1	4	G.2	0
1083	0.774199	4	1	4	G.3	0
1084	0.339757	4	1	4	G.4	0
1085	0.919361	4	1	4	G.5	0
1086	0.794171	4	1	4	G.6	0
1087	0.913816	4	1	4	G.7	0
1088	0.6988	4	1	4	G.8	0
1089	0.848215	4	1	4	G.9	0
1090	0.0128493	4	1	4	G.10	1
1091	0.747684	4	1	4	G.11	0
1092	0.766263	4	1	4	G.12	0
1093	0.65342	4	1	4	G.13	0
1094	0.74023	4	1	4	G.14	0
1095	0.0268167	4	1	4	G.15	0
1096	0.00608302	4	1	4	G.16	0
1097	0.608932	4	1	4	G.17	0
1098	0.774532	4	1	4	G.18	0
1099	0.701787	4	1	4	G.19	0
1100	0.0208859	4	1	4	G.20	0
1101	0.542351	4	1	4	G.21	0
1102	0.770725	4	1	4	G.22	0
1103	0.256823	4	1	4	G.23	0
1104	0.302862	4	1	4	G.24	0
1105	0.026997	4	1	4	G.25	0
1106	0.422232	4	1	4	G.26	0
1107	0.209639	4	1	4	G.27	0
1108	0.423198	4	1	4	G.28	0
1109	0.634928	4	1	4	G.29	0
1110	0.193172	4	1	4	G.30	0
1111	0.551597	4	1	4	G.31	0
1112	0.00332024	4	1	4	G.32	0
1113	0.0896923	4	1	4	G.33	0
1114	0.439013	4	1	4	G.34	0
1115	0.645851	4	1	4	G.35	1
1116	0.32453	4	1	4	G.36	1
1117	0.648918	4	1	4	G.37	0
1118	0.120067	4	1	4	G.38	0
1119	0.323312	4	1	4	G.39	0
1120	0.76185	4	1	4	G.40	0
1121	0.95494	4	2	1	H.1	0				0	0	12
1122	0.525458	4	2	1	H.2	1				1	1
1123	0.648835	4	2	1	H.3	0				0	0
1124	0.280694	4	2	1	H.4	0				1	1
1125	0.211302	4	2	1	H.5	0				0	0
1126	0.393487	4	2	1	H.6	0				1	1
1127	0.344662	4	2	1	H.7	0				0	0
1128	0.751025	4	2	1	H.8	0				0	0
1129	0.613062	4	2	1	H.9	0				0	0
1130	0.2687	4	2	1	H.10	1				1	1
1131	0.573808	4	2	1	H.11	0				0	0
1132	0.4252	4	2	1	H.12	0				0	0
1133	0.241825	4	2	1	H.13	0				1	1
1134	0.0317577	4	2	1	H.14	0				0	0
1135	0.960094	4	2	1	H.15	0				0	0
1136	0.768331	4	2	1	H.16	1				1	1
1137	0.733211	4	2	1	H.17	0				0	0
1138	0.714499	4	2	1	H.18	0				0	0
1139	0.977087	4	2	1	H.19	0				0	0
1140	0.533031	4	2	1	H.20	0				0	0
1141	0.55227	4	2	1	H.21	0				0	0
1142	0.133778	4	2	1	H.22	0				0	0
1143	0.64778	4	2	1	H.23	0				0	0
1144	0.313781	4	2	1	H.24	0				1	1
1145	0.580215	4	2	1	H.25	0				0	0
1146	0.261678	4	2	1	H.26	1				2	1
1147	0.0106423	4	2	1	H.27	0				0	0
1148	0.0977917	4	2	1	H.28	0				0	0
1149	0.267989	4	2	1	H.29	0				1	1
1150	0.825772	4	2	1	H.30	0				0	0
1151	0.777501	4	2	1	H.31	1				2	1
1152	0.991316	4	2	1	H.32	0				0	0
1153	0.889898	4	2	1	H.33	0				0	0
1154	0.0193682	4	2	1	H.34	0				0	0
1155	0.898597	4	2	1	H.35	0				1	1
1156	0.831944	4	2	1	H.36	0				0	0
1157	0.765045	4	2	1	H.37	0				0	0
1158	0.602845	4	2	1	H.38	0				0	0
1159	0.915181	4	2	1	H.39	0				0	0
1160	0.00189145	4	2	1	H.40	0				1	1
1161	0.308326	4	2	2	H.1	0
1162	0.980828	4	2	2	H.2	0
1163	0.206252	4	2	2	H.3	0
1164	0.818317	4	2	2	H.4	1
1165	0.791599	4	2	2	H.5	0
1166	0.588861	4	2	2	H.6	0
1167	0.341747	4	2	2	H.7	0
1168	0.482905	4	2	2	H.8	0
1169	0.847376	4	2	2	H.9	0
1170	0.7995	4	2	2	H.10	0
1171	0.383131	4	2	2	H.11	0
1172	0.273075	4	2	2	H.12	0
1173	0.836842	4	2	2	H.13	0
1174	0.516805	4	2	2	H.14	0
1175	0.661323	4	2	2	H.15	0
1176	0.205118	4	2	2	H.16	0
1177	0.398657	4	2	2	H.17	0
1178	0.631872	4	2	2	H.18	0
1179	0.149146	4	2	2	H.19	0
1180	0.936611	4	2	2	H.20	0
1181	0.509447	4	2	2	H.21	0
1182	0.209497	4	2	2	H.22	0
1183	0.209301	4	2	2	H.23	0
1184	0.912045	4	2	2	H.24	1
1185	0.459532	4	2	2	H.25	0
1186	0.347629	4	2	2	H.26	1
1187	0.618344	4	2	2	H.27	0
1188	0.236276	4	2	2	H.28	0
1189	0.830136	4	2	2	H.29	0
1190	0.353011	4	2	2	H.30	0
1191	0.60795	4	2	2	H.31	0
1192	0.52844	4	2	2	H.32	0
1193	0.204099	4	2	2	H.33	0
1194	0.847223	4	2	2	H.34	0
1195	0.150857	4	2	2	H.35	0
1196	0.24764	4	2	2	H.36	0
1197	0.20898	4	2	2	H.37	0
1198	0.248824	4	2	2	H.38	0
1199	0.359684	4	2	2	H.39	0
1200	0.885345	4	2	2	H.40	0
1201	0.759583	4	2	3	H.1	0
1202	0.16534	4	2	3	H.2	0
1203	0.371496	4	2	3	H.3	0
1204	0.358488	4	2	3	H.4	0
1205	0.825691	4	2	3	H.5	0
1206	0.929322	4	2	3	H.6	0
1207	0.912129	4	2	3	H.7	0
1208	0.0480026	4	2	3	H.8	0
1209	0.522847	4	2	3	H.9	0
1210	0.250044	4	2	3	H.10	0
1211	0.987194	4	2	3	H.11	0
1212	0.900513	4	2	3	H.12	0
1213	0.425887	4	2	3	H.13	1
1214	0.0718834	4	2	3	H.14	0
1215	0.0699709	4	2	3	H.15	0
1216	0.0886355	4	2	3	H.16	0
1217	0.168444	4	2	3	H.17	0
1218	0.762642	4	2	3	H.18	0
1219	0.92389	4	2	3	H.19	0
1220	0.328089	4	2	3	H.20	0
1221	0.618212	4	2	3	H.21	0
1222	0.024155	4	2	3	H.22	0
1223	0.92984	4	2	3	H.23	0
1224	0.557197	4	2	3	H.24	0
1225	0.0180306	4	2	3	H.25	0
1226	0.424366	4	2	3	H.26	0
1227	0.271854	4	2	3	H.27	0
1228	0.930868	4	2	3	H.28	0
1229	0.0462158	4	2	3	H.29	0
1230	0.44969	4	2	3	H.30	0
1231	0.604032	4	2	3	H.31	0
1232	0.558917	4	2	3	H.32	0
1233	0.210204	4	2	3	H.33	0
1234	0.956694	4	2	3	H.34	0
1235	0.160366	4	2	3	H.35	1
1236	0.265786	4	2	3	H.36	0
1237	0.111479	4	2	3	H.37	0
1238	0.347224	4	2	3	H.38	0
1239	0.384731	4	2	3	H.39	0
1240	0.0501223	4	2	3	H.40	0
1241	0.333574	4	2	4	H.1	0
1242	0.433291	4	2	4	H.2	0
1243	0.383086	4	2	4	H.3	0
1244	0.0448518	4	2	4	H.4	0
1245	0.63785	4	2	4	H.5	0
1246	0.737766	4	2	4	H.6	1
1247	0.219285	4	2	4	H.7	0
1248	0.245906	4	2	4	H.8	0
1249	0.718623	4	2	4	H.9	0
1250	0.966778	4	2	4	H.10	0
1251	0.742816	4	2	4	H.11	0
1252	0.44182	4	2	4	H.12	0
1253	0.376476	4	2	4	H.13	0
1254	0.17494	4	2	4	H.14	0
1255	0.652271	4	2	4	H.15	0
1256	0.689503	4	2	4	H.16	0
1257	0.0215107	4	2	4	H.17	0
1258	0.518118	4	2	4	H.18	0
1259	0.146507	4	2	4	H.19	0
1260	0.868126	4	2	4	H.20	0
1261	0.421889	4	2	4	H.21	0
1262	0.850902	4	2	4	H.22	0
1263	0.261418	4	2	4	H.23	0
1264	0.197542	4	2	4	H.24	0
1265	0.438556	4	2	4	H.25	0
1266	0.754703	4	2	4	H.26	0
1267	0.215582	4	2	4	H.27	0
1268	0.689467	4	2	4	H.28	0
1269	0.849378	4	2	4	H.29	1
1270	0.620846	4	2	4	H.30	0
1271	0.586023	4	2	4	H.31	1
1272	0.661922	4	2	4	H.32	0
1273	0.57784	4	2	4	H.33	0
1274	0.973417	4	2	4	H.34	0
1275	0.359655	4	2	4	H.35	0
1276	0.196786	4	2	4	H.36	0
1277	0.610527	4	2	4	H.37	0
1278	0.6705	4	2	4	H.38	0
1279	0.199223	4	2	4	H.39	0
1280	0.894403	4	2	4	H.40	1
1281	0.46342	5	1	1	I.1	0				1	1	11
1282	0.39696	5	1	1	I.2	0				0	0
1283	0.203873	5	1	1	I.3	0				0	0
1284	0.532201	5	1	1	I.4	0				0	0
1285	0.923121	5	1	1	I.5	0				0	0
1286	0.944819	5	1	1	I.6	0				0	0
1287	0.123612	5	1	1	I.7	0				1	1
1288	0.0695441	5	1	1	I.8	0				0	0
1289	0.0533155	5	1	1	I.9	0				0	0
1290	0.653577	5	1	1	I.10	0				0	0
1291	0.413712	5	1	1	I.11	0				0	0
1292	0.415377	5	1	1	I.12	0				0	0
1293	0.697745	5	1	1	I.13	0				1	1
1294	0.880741	5	1	1	I.14	0				0	0
1295	0.95173	5	1	1	I.15	0				0	0
1296	0.78796	5	1	1	I.16	1				1	1
1297	0.0182246	5	1	1	I.17	0				0	0
1298	0.0662444	5	1	1	I.18	0				1	1
1299	0.448019	5	1	1	I.19	0				0	0
1300	0.737483	5	1	1	I.20	0				0	0
1301	0.85561	5	1	1	I.21	0				0	0
1302	0.107654	5	1	1	I.22	1				1	1
1303	0.406454	5	1	1	I.23	0				1	1
1304	0.297983	5	1	1	I.24	0				0	0
1305	0.159764	5	1	1	I.25	0				1	1
1306	0.686952	5	1	1	I.26	0				0	0
1307	0.61606	5	1	1	I.27	0				1	1
1308	0.528249	5	1	1	I.28	0				0	0
1309	0.361748	5	1	1	I.29	0				1	1
1310	0.668637	5	1	1	I.30	0				0	0
1311	0.247877	5	1	1	I.31	0				0	0
1312	0.66698	5	1	1	I.32	0				0	0
1313	0.65792	5	1	1	I.33	0				0	0
1314	0.230776	5	1	1	I.34	0				0	0
1315	0.985737	5	1	1	I.35	0				0	0
1316	0.701107	5	1	1	I.36	0				0	0
1317	0.121092	5	1	1	I.37	0				0	0
1318	0.789576	5	1	1	I.38	0				0	0
1319	0.231533	5	1	1	I.39	0				0	0
1320	0.160042	5	1	1	I.40	0				1	1
1321	0.938079	5	1	2	I.1	0
1322	0.135892	5	1	2	I.2	0
1323	0.520723	5	1	2	I.3	0
1324	0.199822	5	1	2	I.4	0
1325	0.954172	5	1	2	I.5	0
1326	0.837779	5	1	2	I.6	0
1327	0.59919	5	1	2	I.7	1
1328	0.449179	5	1	2	I.8	0
1329	0.953613	5	1	2	I.9	0
1330	0.299482	5	1	2	I.10	0
1331	0.257231	5	1	2	I.11	0
1332	0.567383	5	1	2	I.12	0
1333	0.185634	5	1	2	I.13	0
1334	0.928762	5	1	2	I.14	0
1335	0.162465	5	1	2	I.15	0
1336	0.706284	5	1	2	I.16	0
1337	0.751127	5	1	2	I.17	0
1338	0.449186	5	1	2	I.18	0
1339	0.341569	5	1	2	I.19	0
1340	0.092901	5	1	2	I.20	0
1341	0.69651	5	1	2	I.21	0
1342	0.00387594	5	1	2	I.22	0
1343	0.131382	5	1	2	I.23	0
1344	0.934238	5	1	2	I.24	0
1345	0.949502	5	1	2	I.25	1
1346	0.186405	5	1	2	I.26	0
1347	0.754936	5	1	2	I.27	1
1348	0.0995217	5	1	2	I.28	0
1349	0.19446	5	1	2	I.29	1
1350	0.215288	5	1	2	I.30	0
1351	0.929391	5	1	2	I.31	0
1352	0.445469	5	1	2	I.32	0
1353	0.375837	5	1	2	I.33	0
1354	0.103402	5	1	2	I.34	0
1355	0.860136	5	1	2	I.35	0
1356	0.380325	5	1	2	I.36	0
1357	0.260971	5	1	2	I.37	0
1358	0.224209	5	1	2	I.38	0
1359	0.460245	5	1	2	I.39	0
1360	0.407353	5	1	2	I.40	0
1361	0.164269	5	1	3	I.1	1
1362	0.71037	5	1	3	I.2	0
1363	0.17693	5	1	3	I.3	0
1364	0.881427	5	1	3	I.4	0
1365	0.867812	5	1	3	I.5	0
1366	0.662713	5	1	3	I.6	0
1367	0.601976	5	1	3	I.7	0
1368	0.49727	5	1	3	I.8	0
1369	0.0339448	5	1	3	I.9	0
1370	0.821963	5	1	3	I.10	0
1371	0.95267	5	1	3	I.11	0
1372	0.20191	5	1	3	I.12	0
1373	0.448341	5	1	3	I.13	0
1374	0.381993	5	1	3	I.14	0
1375	0.273938	5	1	3	I.15	0
1376	0.955745	5	1	3	I.16	0
1377	0.902521	5	1	3	I.17	0
1378	0.505285	5	1	3	I.18	1
1379	0.343788	5	1	3	I.19	0
1380	0.545552	5	1	3	I.20	0
1381	0.947252	5	1	3	I.21	0
1382	0.0653063	5	1	3	I.22	0
1383	0.928129	5	1	3	I.23	1
1384	0.699138	5	1	3	I.24	0
1385	0.325232	5	1	3	I.25	0
1386	0.336009	5	1	3	I.26	0
1387	0.180823	5	1	3	I.27	0
1388	0.0504593	5	1	3	I.28	0
1389	0.823423	5	1	3	I.29	0
1390	0.36548	5	1	3	I.30	0
1391	0.782876	5	1	3	I.31	0
1392	0.127575	5	1	3	I.32	0
1393	0.12382	5	1	3	I.33	0
1394	0.822835	5	1	3	I.34	0
1395	0.773006	5	1	3	I.35	0
1396	0.720738	5	1	3	I.36	0
1397	0.364605	5	1	3	I.37	0
1398	0.666865	5	1	3	I.38	0
1399	0.618578	5	1	3	I.39	0
1400	0.345827	5	1	3	I.40	0
1401	0.983085	5	1	4	I.1	0
1402	0.0207882	5	1	4	I.2	0
1403	0.769314	5	1	4	I.3	0
1404	0.0842871	5	1	4	I.4	0
1405	0.0109104	5	1	4	I.5	0
1406	0.40504	5	1	4	I.6	0
1407	0.120967	5	1	4	I.7	0
1408	0.902714	5	1	4	I.8	0
1409	0.225514	5	1	4	I.9	0
1410	0.355388	5	1	4	I.10	0
1411	0.960064	5	1	4	I.11	0
1412	0.416807	5	1	4	I.12	0
1413	0.128867	5	1	4	I.13	1
1414	0.223653	5	1	4	I.14	0
1415	0.679596	5	1	4	I.15	0
1416	0.621745	5	1	4	I.16	0
1417	0.722087	5	1	4	I.17	0
1418	0.440357	5	1	4	I.18	0
1419	0.277607	5	1	4	I.19	0
1420	0.927335	5	1	4	I.20	0
1421	0.719596	5	1	4	I.21	0
1422	0.869567	5	1	4	I.22	0
1423	0.645796	5	1	4	I.23	0
1424	0.0802954	5	1	4	I.24	0
1425	0.850447	5	1	4	I.25	0
1426	0.214463	5	1	4	I.26	0
1427	0.475034	5	1	4	I.27	0
1428	0.875539	5	1	4	I.28	0
1429	0.211332	5	1	4	I.29	0
1430	0.871277	5	1	4	I.30	0
1431	0.945853	5	1	4	I.31	0
1432	0.78452	5	1	4	I.32	0
1433	0.551265	5	1	4	I.33	0
1434	0.288651	5	1	4	I.34	0
1435	0.358179	5	1	4	I.35	0
1436	0.386011	5	1	4	I.36	0
1437	0.0335741	5	1	4	I.37	0
1438	0.802991	5	1	4	I.38	0
1439	0.317186	5	1	4	I.39	0
1440	0.483959	5	1	4	I.40	1
1441	0.820287	5	2	1	J.1	0				0	0	7
1442	0.469376	5	2	1	J.2	0				0	0
1443	0.0883032	5	2	1	J.3	0				0	0
1444	0.645054	5	2	1	J.4	1				2	1
1445	0.372095	5	2	1	J.5	0				0	0
1446	0.386758	5	2	1	J.6	1				1	1
1447	0.0521998	5	2	1	J.7	0				0	0
1448	0.11756	5	2	1	J.8	0				0	0
1449	0.701572	5	2	1	J.9	0				0	0
1450	0.928343	5	2	1	J.10	0				0	0
1451	0.791691	5	2	1	J.11	0				0	0
1452	0.927825	5	2	1	J.12	0				0	0
1453	0.102146	5	2	1	J.13	0				0	0
1454	0.662941	5	2	1	J.14	0				0	0
1455	0.410771	5	2	1	J.15	0				0	0
1456	0.857763	5	2	1	J.16	0				0	0
1457	0.745351	5	2	1	J.17	0				0	0
1458	0.745625	5	2	1	J.18	0				0	0
1459	0.102588	5	2	1	J.19	0				0	0
1460	0.918623	5	2	1	J.20	0				0	0
1461	0.332654	5	2	1	J.21	0				0	0
1462	0.722176	5	2	1	J.22	1				1	1
1463	0.420798	5	2	1	J.23	0				1	1
1464	0.70576	5	2	1	J.24	0				1	1
1465	0.974204	5	2	1	J.25	0				0	0
1466	0.903167	5	2	1	J.26	0				0	0
1467	0.258427	5	2	1	J.27	0				0	0
1468	0.0811955	5	2	1	J.28	0				0	0
1469	0.923338	5	2	1	J.29	0				1	1
1470	0.938994	5	2	1	J.30	0				0	0
1471	0.719561	5	2	1	J.31	0				0	0
1472	0.421938	5	2	1	J.32	1				1	1
1473	0.845774	5	2	1	J.33	0				0	0
1474	0.92826	5	2	1	J.34	0				0	0
1475	0.0934618	5	2	1	J.35	0				0	0
1476	0.366863	5	2	1	J.36	0				0	0
1477	0.943515	5	2	1	J.37	0				0	0
1478	0.0832467	5	2	1	J.38	0				0	0
1479	0.0179447	5	2	1	J.39	0				0	0
1480	0.966066	5	2	1	J.40	0				0	0
1481	0.589177	5	2	2	J.1	0
1482	0.519143	5	2	2	J.2	0
1483	0.747587	5	2	2	J.3	0
1484	0.69041	5	2	2	J.4	0
1485	0.260802	5	2	2	J.5	0
1486	0.44158	5	2	2	J.6	0
1487	0.376911	5	2	2	J.7	0
1488	0.809195	5	2	2	J.8	0
1489	0.229408	5	2	2	J.9	0
1490	0.32667	5	2	2	J.10	0
1491	0.501664	5	2	2	J.11	0
1492	0.989792	5	2	2	J.12	0
1493	0.0068593	5	2	2	J.13	0
1494	0.402048	5	2	2	J.14	0
1495	0.944339	5	2	2	J.15	0
1496	0.09235	5	2	2	J.16	0
1497	0.594044	5	2	2	J.17	0
1498	0.900532	5	2	2	J.18	0
1499	0.501003	5	2	2	J.19	0
1500	0.203589	5	2	2	J.20	0
1501	0.780851	5	2	2	J.21	0
1502	0.6217	5	2	2	J.22	0
1503	0.0910931	5	2	2	J.23	1
1504	0.293593	5	2	2	J.24	1
1505	0.39471	5	2	2	J.25	0
1506	0.9465	5	2	2	J.26	0
1507	0.843706	5	2	2	J.27	0
1508	0.867041	5	2	2	J.28	0
1509	0.0214848	5	2	2	J.29	0
1510	0.00633132	5	2	2	J.30	0
1511	0.959679	5	2	2	J.31	0
1512	0.411494	5	2	2	J.32	0
1513	0.542744	5	2	2	J.33	0
1514	0.386881	5	2	2	J.34	0
1515	0.544127	5	2	2	J.35	0
1516	0.154784	5	2	2	J.36	0
1517	0.00475823	5	2	2	J.37	0
1518	0.655809	5	2	2	J.38	0
1519	0.403902	5	2	2	J.39	0
1520	0.387915	5	2	2	J.40	0
1521	0.184588	5	2	3	J.1	0
1522	0.449873	5	2	3	J.2	0
1523	0.399677	5	2	3	J.3	0
1524	0.648193	5	2	3	J.4	1
1525	0.0354335	5	2	3	J.5	0
1526	0.230483	5	2	3	J.6	0
1527	0.97065	5	2	3	J.7	0
1528	0.919143	5	2	3	J.8	0
1529	0.765859	5	2	3	J.9	0
1530	0.207487	5	2	3	J.10	0
1531	0.988855	5	2	3	J.11	0
1532	0.57888	5	2	3	J.12	0
1533	0.571713	5	2	3	J.13	0
1534	0.107918	5	2	3	J.14	0
1535	0.112987	5	2	3	J.15	0
1536	0.405637	5	2	3	J.16	0
1537	0.363079	5	2	3	J.17	0
1538	0.600841	5	2	3	J.18	0
1539	0.969724	5	2	3	J.19	0
1540	0.761652	5	2	3	J.20	0
1541	0.113482	5	2	3	J.21	0
1542	0.937816	5	2	3	J.22	0
1543	0.610682	5	2	3	J.23	0
1544	0.552123	5	2	3	J.24	0
1545	0.105533	5	2	3	J.25	0
1546	0.543447	5	2	3	J.26	0
1547	0.373839	5	2	3	J.27	0
1548	0.489013	5	2	3	J.28	0
1549	0.286623	5	2	3	J.29	0
1550	0.145471	5	2	3	J.30	0
1551	0.0987995	5	2	3	J.31	0
1552	0.153796	5	2	3	J.32	0
1553	0.0232002	5	2	3	J.33	0
1554	0.438317	5	2	3	J.34	0
1555	0.563636	5	2	3	J.35	0
1556	0.276155	5	2	3	J.36	0
1557	0.0235699	5	2	3	J.37	0
1558	0.805434	5	2	3	J.38	0
1559	0.0998281	5	2	3	J.39	0
1560	0.821496	5	2	3	J.40	0
1561	0.91184	5	2	4	J.1	0
1562	0.602566	5	2	4	J.2	0
1563	0.723806	5	2	4	J.3	0
1564	0.956533	5	2	4	J.4	0
1565	0.311228	5	2	4	J.5	0
1566	0.15319	5	2	4	J.6	0
1567	0.502801	5	2	4	J.7	0
1568	0.179172	5	2	4	J.8	0
1569	0.878798	5	2	4	J.9	0
1570	0.5512	5	2	4	J.10	0
1571	0.936096	5	2	4	J.11	0
1572	0.727966	5	2	4	J.12	0
1573	0.487925	5	2	4	J.13	0
1574	0.511866	5	2	4	J.14	0
1575	0.555284	5	2	4	J.15	0
1576	0.975773	5	2	4	J.16	0
1577	0.856991	5	2	4	J.17	0
1578	0.718368	5	2	4	J.18	0
1579	0.647239	5	2	4	J.19	0
1580	0.290518	5	2	4	J.20	0
1581	0.471885	5	2	4	J.21	0
1582	0.385271	5	2	4	J.22	0
1583	0.201272	5	2	4	J.23	0
1584	0.937189	5	2	4	J.24	0
1585	0.399582	5	2	4	J.25	0
1586	0.083883	5	2	4	J.26	0
1587	0.881394	5	2	4	J.27	0
1588	0.821511	5	2	4	J.28	0
1589	0.978224	5	2	4	J.29	1
1590	0.121906	5	2	4	J.30	0
1591	0.818437	5	2	4	J.31	0
1592	0.273311	5	2	4	J.32	0
1593	0.712193	5	2	4	J.33	0
1594	0.601067	5	2	4	J.34	0
1595	0.985559	5	2	4	J.35	0
1596	0.167298	5	2	4	J.36	0
1597	0.0467552	5	2	4	J.37	0
1598	0.612484	5	2	4	J.38	0
1599	0.188326	5	2	4	J.39	0
1600	0.641112	5	2	4	J.40	0
1601	0.056033	6	1	1	K.1	0				1	1	18
1602	0.516883	6	1	1	K.2	0				1	1
1603	0.471001	6	1	1	K.3	1				1	1
1604	0.752572	6	1	1	K.4	0				0	0
1605	0.561376	6	1	1	K.5	0				0	0
1606	0.811385	6	1	1	K.6	0				0	0
1607	0.141595	6	1	1	K.7	1				2	1
1608	0.852562	6	1	1	K.8	0				0	0
1609	0.723315	6	1	1	K.9	0				0	0
1610	0.242713	6	1	1	K.10	0				1	1
1611	0.386284	6	1	1	K.11	0				1	1
1612	0.289416	6	1	1	K.12	0				0	0
1613	0.223909	6	1	1	K.13	0				0	0
1614	0.602668	6	1	1	K.14	0				0	0
1615	0.773843	6	1	1	K.15	1				1	1
1616	0.347479	6	1	1	K.16	0				0	0
1617	0.171626	6	1	1	K.17	0				1	1
1618	0.105989	6	1	1	K.18	0				0	0
1619	0.679764	6	1	1	K.19	0				1	1
1620	0.775759	6	1	1	K.20	0				0	0
1621	0.0488269	6	1	1	K.21	0				0	0
1622	0.56322	6	1	1	K.22	1				1	1
1623	0.918858	6	1	1	K.23	0				0	0
1624	0.723522	6	1	1	K.24	1				1	1
1625	0.375307	6	1	1	K.25	0				0	0
1626	0.803917	6	1	1	K.26	1				1	1
1627	0.5391	6	1	1	K.27	0				0	0
1628	0.621505	6	1	1	K.28	0				1	1
1629	0.813309	6	1	1	K.29	0				0	0
1630	0.894868	6	1	1	K.30	0				1	1
1631	0.252841	6	1	1	K.31	0				0	0
1632	0.518389	6	1	1	K.32	0				0	0
1633	0.199232	6	1	1	K.33	0				0	0
1634	0.6499	6	1	1	K.34	0				1	1
1635	0.667778	6	1	1	K.35	0				0	0
1636	0.807487	6	1	1	K.36	0				0	0
1637	0.353984	6	1	1	K.37	0				1	1
1638	0.971506	6	1	1	K.38	0				1	1
1639	0.016782	6	1	1	K.39	0				1	1
1640	0.160997	6	1	1	K.40	0				0	0
1641	0.223518	6	1	2	K.1	0
1642	0.29997	6	1	2	K.2	0
1643	0.125879	6	1	2	K.3	0
1644	0.777683	6	1	2	K.4	0
1645	0.681462	6	1	2	K.5	0
1646	0.3521	6	1	2	K.6	0
1647	0.463395	6	1	2	K.7	0
1648	0.611292	6	1	2	K.8	0
1649	0.158952	6	1	2	K.9	0
1650	0.0991134	6	1	2	K.10	0
1651	0.0342407	6	1	2	K.11	0
1652	0.359228	6	1	2	K.12	0
1653	0.544139	6	1	2	K.13	0
1654	0.13187	6	1	2	K.14	0
1655	0.839798	6	1	2	K.15	0
1656	0.506216	6	1	2	K.16	0
1657	0.229908	6	1	2	K.17	1
1658	0.213151	6	1	2	K.18	0
1659	0.132003	6	1	2	K.19	0
1660	0.258117	6	1	2	K.20	0
1661	0.400668	6	1	2	K.21	0
1662	0.866992	6	1	2	K.22	0
1663	0.521903	6	1	2	K.23	0
1664	0.642077	6	1	2	K.24	0
1665	0.314353	6	1	2	K.25	0
1666	0.545575	6	1	2	K.26	0
1667	0.535183	6	1	2	K.27	0
1668	0.68599	6	1	2	K.28	1
1669	0.645513	6	1	2	K.29	0
1670	0.740803	6	1	2	K.30	0
1671	0.449726	6	1	2	K.31	0
1672	0.574994	6	1	2	K.32	0
1673	0.674094	6	1	2	K.33	0
1674	0.813197	6	1	2	K.34	0
1675	0.654606	6	1	2	K.35	0
1676	0.777042	6	1	2	K.36	0
1677	0.78427	6	1	2	K.37	0
1678	0.44575	6	1	2	K.38	0
1679	0.925856	6	1	2	K.39	0
1680	0.00548582	6	1	2	K.40	0
1681	0.665989	6	1	3	K.1	1
1682	0.0926266	6	1	3	K.2	0
1683	0.362484	6	1	3	K.3	0
1684	0.244793	6	1	3	K.4	0
1685	0.24076	6	1	3	K.5	0
1686	0.96903	6	1	3	K.6	0
1687	0.980731	6	1	3	K.7	1
1688	0.561327	6	1	3	K.8	0
1689	0.490614	6	1	3	K.9	0
1690	0.835526	6	1	3	K.10	1
1691	0.539712	6	1	3	K.11	0
1692	0.495501	6	1	3	K.12	0
1693	0.083462	6	1	3	K.13	0
1694	0.0597911	6	1	3	K.14	0
1695	0.150899	6	1	3	K.15	0
1696	0.971248	6	1	3	K.16	0
1697	0.0667452	6	1	3	K.17	0
1698	0.154049	6	1	3	K.18	0
1699	0.579259	6	1	3	K.19	1
1700	0.980415	6	1	3	K.20	0
1701	0.344723	6	1	3	K.21	0
1702	0.969654	6	1	3	K.22	0
1703	0.695346	6	1	3	K.23	0
1704	0.654621	6	1	3	K.24	0
1705	0.173448	6	1	3	K.25	0
1706	0.422322	6	1	3	K.26	0
1707	0.464886	6	1	3	K.27	0
1708	0.0984865	6	1	3	K.28	0
1709	0.354954	6	1	3	K.29	0
1710	0.336733	6	1	3	K.30	0
1711	0.843648	6	1	3	K.31	0
1712	0.0267494	6	1	3	K.32	0
1713	0.77219	6	1	3	K.33	0
1714	0.981231	6	1	3	K.34	1
1715	0.941289	6	1	3	K.35	0
1716	0.704196	6	1	3	K.36	0
1717	0.729926	6	1	3	K.37	0
1718	0.852307	6	1	3	K.38	0
1719	0.462427	6	1	3	K.39	0
1720	0.638177	6	1	3	K.40	0
1721	0.444437	6	1	4	K.1	0
1722	0.610325	6	1	4	K.2	1
1723	0.98215	6	1	4	K.3	0
1724	0.925288	6	1	4	K.4	0
1725	0.0401751	6	1	4	K.5	0
1726	0.133742	6	1	4	K.6	0
1727	0.58446	6	1	4	K.7	0
1728	0.689946	6	1	4	K.8	0
1729	0.583041	6	1	4	K.9	0
1730	0.269063	6	1	4	K.10	0
1731	0.517504	6	1	4	K.11	1
1732	0.64492	6	1	4	K.12	0
1733	0.0607047	6	1	4	K.13	0
1734	0.430479	6	1	4	K.14	0
1735	0.883618	6	1	4	K.15	0
1736	0.971983	6	1	4	K.16	0
1737	0.0117337	6	1	4	K.17	0
1738	0.592908	6	1	4	K.18	0
1739	0.238586	6	1	4	K.19	0
1740	0.443171	6	1	4	K.20	0
1741	0.427218	6	1	4	K.21	0
1742	0.669461	6	1	4	K.22	0
1743	0.191327	6	1	4	K.23	0
1744	0.917422	6	1	4	K.24	0
1745	0.970903	6	1	4	K.25	0
1746	0.485883	6	1	4	K.26	0
1747	0.0949029	6	1	4	K.27	0
1748	0.390501	6	1	4	K.28	0
1749	0.321383	6	1	4	K.29	0
1750	0.637675	6	1	4	K.30	1
1751	0.110516	6	1	4	K.31	0
1752	0.383942	6	1	4	K.32	0
1753	0.481741	6	1	4	K.33	0
1754	0.0874437	6	1	4	K.34	0
1755	0.816888	6	1	4	K.35	0
1756	0.63977	6	1	4	K.36	0
1757	0.73488	6	1	4	K.37	1
1758	0.537952	6	1	4	K.38	1
1759	0.986022	6	1	4	K.39	1
1760	0.196839	6	1	4	K.40	0
1761	0.739001	6	2	1	L.1	1				1	1	10
1762	0.148032	6	2	1	L.2	0				0	0
1763	0.210247	6	2	1	L.3	0				0	0
1764	0.555036	6	2	1	L.4	1				1	1
1765	0.322839	6	2	1	L.5	0				1	1
1766	0.0287952	6	2	1	L.6	0				0	0
1767	0.90392	6	2	1	L.7	0				0	0
1768	0.855634	6	2	1	L.8	0				1	1
1769	0.263542	6	2	1	L.9	0				0	0
1770	0.117748	6	2	1	L.10	0				0	0
1771	0.520145	6	2	1	L.11	0				0	0
1772	0.578007	6	2	1	L.12	0				0	0
1773	0.518259	6	2	1	L.13	0				0	0
1774	0.097118	6	2	1	L.14	0				0	0
1775	0.890866	6	2	1	L.15	0				0	0
1776	0.408383	6	2	1	L.16	0				0	0
1777	0.732004	6	2	1	L.17	0				0	0
1778	0.458056	6	2	1	L.18	0				0	0
1779	0.837973	6	2	1	L.19	0				0	0
1780	0.0719329	6	2	1	L.20	1				1	1
1781	0.043443	6	2	1	L.21	1				1	1
1782	0.771454	6	2	1	L.22	0				0	0
1783	0.532586	6	2	1	L.23	0				0	0
1784	0.33623	6	2	1	L.24	0				0	0
1785	0.524954	6	2	1	L.25	0				1	1
1786	0.287223	6	2	1	L.26	1				1	1
1787	0.977043	6	2	1	L.27	0				0	0
1788	0.947865	6	2	1	L.28	0				0	0
1789	0.803424	6	2	1	L.29	0				0	0
1790	0.561392	6	2	1	L.30	0				1	1
1791	0.775802	6	2	1	L.31	0				0	0
1792	0.315311	6	2	1	L.32	0				0	0
1793	0.523315	6	2	1	L.33	0				0	0
1794	0.97813	6	2	1	L.34	0				0	0
1795	0.348705	6	2	1	L.35	0				0	0
1796	0.622821	6	2	1	L.36	0				0	0
1797	0.267345	6	2	1	L.37	0				0	0
1798	0.0403584	6	2	1	L.38	0				0	0
1799	0.961467	6	2	1	L.39	1				1	1
1800	0.755485	6	2	1	L.40	0				0	0
1801	0.442068	6	2	2	L.1	0
1802	0.266682	6	2	2	L.2	0
1803	0.274983	6	2	2	L.3	0
1804	0.441859	6	2	2	L.4	0
1805	0.441041	6	2	2	L.5	1
1806	0.887777	6	2	2	L.6	0
1807	0.267989	6	2	2	L.7	0
1808	0.671228	6	2	2	L.8	1
1809	0.928307	6	2	2	L.9	0
1810	0.289096	6	2	2	L.10	0
1811	0.706097	6	2	2	L.11	0
1812	0.113058	6	2	2	L.12	0
1813	0.42383	6	2	2	L.13	0
1814	0.141059	6	2	2	L.14	0
1815	0.241396	6	2	2	L.15	0
1816	0.316284	6	2	2	L.16	0
1817	0.51835	6	2	2	L.17	0
1818	0.624593	6	2	2	L.18	0
1819	0.324323	6	2	2	L.19	0
1820	0.357036	6	2	2	L.20	0
1821	0.316432	6	2	2	L.21	0
1822	0.47626	6	2	2	L.22	0
1823	0.852408	6	2	2	L.23	0
1824	0.697025	6	2	2	L.24	0
1825	0.630076	6	2	2	L.25	1
1826	0.472022	6	2	2	L.26	0
1827	0.829875	6	2	2	L.27	0
1828	0.532356	6	2	2	L.28	0
1829	0.13933	6	2	2	L.29	0
1830	0.471088	6	2	2	L.30	0
1831	0.814485	6	2	2	L.31	0
1832	0.850136	6	2	2	L.32	0
1833	0.559439	6	2	2	L.33	0
1834	0.766603	6	2	2	L.34	0
1835	0.780565	6	2	2	L.35	0
1836	0.566864	6	2	2	L.36	0
1837	0.484772	6	2	2	L.37	0
1838	0.222458	6	2	2	L.38	0
1839	0.10961	6	2	2	L.39	0
1840	0.807768	6	2	2	L.40	0
1841	0.285918	6	2	3	L.1	0
1842	0.744554	6	2	3	L.2	0
1843	0.723006	6	2	3	L.3	0
1844	0.803958	6	2	3	L.4	0
1845	0.0398351	6	2	3	L.5	0
1846	0.0626121	6	2	3	L.6	0
1847	0.337733	6	2	3	L.7	0
1848	0.511259	6	2	3	L.8	0
1849	0.587905	6	2	3	L.9	0
1850	0.935246	6	2	3	L.10	0
1851	0.965096	6	2	3	L.11	0
1852	0.642755	6	2	3	L.12	0
1853	0.697903	6	2	3	L.13	0
1854	0.416939	6	2	3	L.14	0
1855	0.862675	6	2	3	L.15	0
1856	0.933183	6	2	3	L.16	0
1857	0.3511	6	2	3	L.17	0
1858	0.355126	6	2	3	L.18	0
1859	0.615581	6	2	3	L.19	0
1860	0.322801	6	2	3	L.20	0
1861	0.123283	6	2	3	L.21	0
1862	0.70013	6	2	3	L.22	0
1863	0.067677	6	2	3	L.23	0
1864	0.944258	6	2	3	L.24	0
1865	0.975825	6	2	3	L.25	0
1866	0.522864	6	2	3	L.26	0
1867	0.602087	6	2	3	L.27	0
1868	0.643769	6	2	3	L.28	0
1869	0.14826	6	2	3	L.29	0
1870	0.360792	6	2	3	L.30	1
1871	0.510352	6	2	3	L.31	0
1872	0.0956176	6	2	3	L.32	0
1873	0.764291	6	2	3	L.33	0
1874	0.32831	6	2	3	L.34	0
1875	0.0820157	6	2	3	L.35	0
1876	0.835492	6	2	3	L.36	0
1877	0.0722193	6	2	3	L.37	0
1878	0.919025	6	2	3	L.38	0
1879	0.0822259	6	2	3	L.39	0
1880	0.957009	6	2	3	L.40	0

## Sheet: results.of.1000.simulation
Nr.	Mean.individuals.using.tools.per.subbopulation
1	9.41667
2	9.5		mean	SD	N	confidence 95%
3	9.5		10.1971	0.257118	1000	0.015936
4	9.5		10.1811
5	9.5		10.213
6	9.5
7	9.5
8	9.5
9	9.5
10	9.58333
11	9.58333
12	9.66667
13	9.66667
14	9.66667
15	9.66667
16	9.66667
17	9.66667
18	9.66667
19	9.66667
20	9.66667
21	9.66667
22	9.66667
23	9.66667
24	9.66667
25	9.66667
26	9.66667
27	9.66667
28	9.66667
29	9.66667
30	9.66667
31	9.66667
32	9.66667
33	9.66667
34	9.66667
35	9.75
36	9.75
37	9.75
38	9.75
39	9.75
40	9.75
41	9.75
42	9.75
43	9.75
44	9.75
45	9.75
46	9.75
47	9.75
48	9.75
49	9.75
50	9.75
51	9.75
52	9.75
53	9.75
54	9.75
55	9.75
56	9.75
57	9.75
58	9.75
59	9.75
60	9.75
61	9.75
62	9.75
63	9.75
64	9.75
65	9.75
66	9.83333
67	9.83333
68	9.83333
69	9.83333
70	9.83333
71	9.83333
72	9.83333
73	9.83333
74	9.83333
75	9.83333
76	9.83333
77	9.83333
78	9.83333
79	9.83333
80	9.83333
81	9.83333
82	9.83333
83	9.83333
84	9.83333
85	9.83333
86	9.83333
87	9.83333
88	9.83333
89	9.83333
90	9.83333
91	9.83333
92	9.83333
93	9.83333
94	9.83333
95	9.83333
96	9.83333
97	9.83333
98	9.83333
99	9.83333
100	9.83333
101	9.83333
102	9.83333
103	9.83333
104	9.83333
105	9.83333
106	9.83333
107	9.83333
108	9.83333
109	9.91667
110	9.91667
111	9.91667
112	9.91667
113	9.91667
114	9.91667
115	9.91667
116	9.91667
117	9.91667
118	9.91667
119	9.91667
120	9.91667
121	9.91667
122	9.91667
123	9.91667
124	9.91667
125	9.91667
126	9.91667
127	9.91667
128	9.91667
129	9.91667
130	9.91667
131	9.91667
132	9.91667
133	9.91667
134	9.91667
135	9.91667
136	9.91667
137	9.91667
138	9.91667
139	9.91667
140	9.91667
141	9.91667
142	9.91667
143	9.91667
144	9.91667
145	9.91667
146	9.91667
147	9.91667
148	9.91667
149	9.91667
150	9.91667
151	9.91667
152	9.91667
153	9.91667
154	9.91667
155	9.91667
156	9.91667
157	9.91667
158	9.91667
159	9.91667
160	9.91667
161	9.91667
162	9.91667
163	9.91667
164	9.91667
165	9.91667
166	9.91667
167	9.91667
168	9.91667
169	9.91667
170	9.91667
171	9.91667
172	9.91667
173	9.91667
174	9.91667
175	9.91667
176	9.91667
177	10
178	10
179	10
180	10
181	10
182	10
183	10
184	10
185	10
186	10
187	10
188	10
189	10
190	10
191	10
192	10
193	10
194	10
195	10
196	10
197	10
198	10
199	10
200	10
201	10
202	10
203	10
204	10
205	10
206	10
207	10
208	10
209	10
210	10
211	10
212	10
213	10
214	10
215	10
216	10
217	10
218	10
219	10
220	10
221	10
222	10
223	10
224	10
225	10
226	10
227	10
228	10
229	10
230	10
231	10
232	10
233	10
234	10
235	10
236	10
237	10
238	10
239	10
240	10
241	10
242	10
243	10
244	10
245	10
246	10
247	10
248	10
249	10
250	10
251	10
252	10
253	10
254	10
255	10
256	10
257	10
258	10
259	10
260	10
261	10
262	10
263	10
264	10
265	10.0833
266	10.0833
267	10.0833
268	10.0833
269	10.0833
270	10.0833
271	10.0833
272	10.0833
273	10.0833
274	10.0833
275	10.0833
276	10.0833
277	10.0833
278	10.0833
279	10.0833
280	10.0833
281	10.0833
282	10.0833
283	10.0833
284	10.0833
285	10.0833
286	10.0833
287	10.0833
288	10.0833
289	10.0833
290	10.0833
291	10.0833
292	10.0833
293	10.0833
294	10.0833
295	10.0833
296	10.0833
297	10.0833
298	10.0833
299	10.0833
300	10.0833
301	10.0833
302	10.0833
303	10.0833
304	10.0833
305	10.0833
306	10.0833
307	10.0833
308	10.0833
309	10.0833
310	10.0833
311	10.0833
312	10.0833
313	10.0833
314	10.0833
315	10.0833
316	10.0833
317	10.0833
318	10.0833
319	10.0833
320	10.0833
321	10.0833
322	10.0833
323	10.0833
324	10.0833
325	10.0833
326	10.0833
327	10.0833
328	10.0833
329	10.0833
330	10.0833
331	10.0833
332	10.0833
333	10.0833
334	10.0833
335	10.0833
336	10.0833
337	10.0833
338	10.0833
339	10.0833
340	10.0833
341	10.0833
342	10.0833
343	10.0833
344	10.0833
345	10.0833
346	10.0833
347	10.0833
348	10.0833
349	10.0833
350	10.0833
351	10.0833
352	10.0833
353	10.0833
354	10.0833
355	10.0833
356	10.0833
357	10.0833
358	10.0833
359	10.0833
360	10.0833
361	10.0833
362	10.0833
363	10.0833
364	10.0833
365	10.0833
366	10.0833
367	10.0833
368	10.0833
369	10.0833
370	10.0833
371	10.0833
372	10.0833
373	10.0833
374	10.0833
375	10.0833
376	10.0833
377	10.0833
378	10.0833
379	10.0833
380	10.0833
381	10.0833
382	10.0833
383	10.0833
384	10.0833
385	10.0833
386	10.1667
387	10.1667
388	10.1667
389	10.1667
390	10.1667
391	10.1667
392	10.1667
393	10.1667
394	10.1667
395	10.1667
396	10.1667
397	10.1667
398	10.1667
399	10.1667
400	10.1667
401	10.1667
402	10.1667
403	10.1667
404	10.1667
405	10.1667
406	10.1667
407	10.1667
408	10.1667
409	10.1667
410	10.1667
411	10.1667
412	10.1667
413	10.1667
414	10.1667
415	10.1667
416	10.1667
417	10.1667
418	10.1667
419	10.1667
420	10.1667
421	10.1667
422	10.1667
423	10.1667
424	10.1667
425	10.1667
426	10.1667
427	10.1667
428	10.1667
429	10.1667
430	10.1667
431	10.1667
432	10.1667
433	10.1667
434	10.1667
435	10.1667
436	10.1667
437	10.1667
438	10.1667
439	10.1667
440	10.1667
441	10.1667
442	10.1667
443	10.1667
444	10.1667
445	10.1667
446	10.1667
447	10.1667
448	10.1667
449	10.1667
450	10.1667
451	10.1667
452	10.1667
453	10.1667
454	10.1667
455	10.1667
456	10.1667
457	10.1667
458	10.1667
459	10.1667
460	10.1667
461	10.1667
462	10.1667
463	10.1667
464	10.1667
465	10.1667
466	10.1667
467	10.1667
468	10.1667
469	10.1667
470	10.1667
471	10.1667
472	10.1667
473	10.1667
474	10.1667
475	10.1667
476	10.1667
477	10.1667
478	10.1667
479	10.1667
480	10.1667
481	10.1667
482	10.1667
483	10.1667
484	10.1667
485	10.1667
486	10.1667
487	10.1667
488	10.1667
489	10.1667
490	10.1667
491	10.1667
492	10.1667
493	10.1667
494	10.1667
495	10.1667
496	10.1667
497	10.1667
498	10.1667
499	10.1667
500	10.1667
501	10.1667
502	10.1667
503	10.1667
504	10.1667
505	10.1667
506	10.1667
507	10.1667
508	10.1667
509	10.1667
510	10.1667
511	10.1667
512	10.1667
513	10.1667
514	10.1667
515	10.1667
516	10.1667
517	10.25
518	10.25
519	10.25
520	10.25
521	10.25
522	10.25
523	10.25
524	10.25
525	10.25
526	10.25
527	10.25
528	10.25
529	10.25
530	10.25
531	10.25
532	10.25
533	10.25
534	10.25
535	10.25
536	10.25
537	10.25
538	10.25
539	10.25
540	10.25
541	10.25
542	10.25
543	10.25
544	10.25
545	10.25
546	10.25
547	10.25
548	10.25
549	10.25
550	10.25
551	10.25
552	10.25
553	10.25
554	10.25
555	10.25
556	10.25
557	10.25
558	10.25
559	10.25
560	10.25
561	10.25
562	10.25
563	10.25
564	10.25
565	10.25
566	10.25
567	10.25
568	10.25
569	10.25
570	10.25
571	10.25
572	10.25
573	10.25
574	10.25
575	10.25
576	10.25
577	10.25
578	10.25
579	10.25
580	10.25
581	10.25
582	10.25
583	10.25
584	10.25
585	10.25
586	10.25
587	10.25
588	10.25
589	10.25
590	10.25
591	10.25
592	10.25
593	10.25
594	10.25
595	10.25
596	10.25
597	10.25
598	10.25
599	10.25
600	10.25
601	10.25
602	10.25
603	10.25
604	10.25
605	10.25
606	10.25
607	10.25
608	10.25
609	10.25
610	10.25
611	10.25
612	10.25
613	10.25
614	10.25
615	10.25
616	10.25
617	10.25
618	10.25
619	10.25
620	10.25
621	10.25
622	10.25
623	10.25
624	10.25
625	10.25
626	10.25
627	10.25
628	10.25
629	10.3333
630	10.3333
631	10.3333
632	10.3333
633	10.3333
634	10.3333
635	10.3333
636	10.3333
637	10.3333
638	10.3333
639	10.3333
640	10.3333
641	10.3333
642	10.3333
643	10.3333
644	10.3333
645	10.3333
646	10.3333
647	10.3333
648	10.3333
649	10.3333
650	10.3333
651	10.3333
652	10.3333
653	10.3333
654	10.3333
655	10.3333
656	10.3333
657	10.3333
658	10.3333
659	10.3333
660	10.3333
661	10.3333
662	10.3333
663	10.3333
664	10.3333
665	10.3333
666	10.3333
667	10.3333
668	10.3333
669	10.3333
670	10.3333
671	10.3333
672	10.3333
673	10.3333
674	10.3333
675	10.3333
676	10.3333
677	10.3333
678	10.3333
679	10.3333
680	10.3333
681	10.3333
682	10.3333
683	10.3333
684	10.3333
685	10.3333
686	10.3333
687	10.3333
688	10.3333
689	10.3333
690	10.3333
691	10.3333
692	10.3333
693	10.3333
694	10.3333
695	10.3333
696	10.3333
697	10.3333
698	10.3333
699	10.3333
700	10.3333
701	10.3333
702	10.3333
703	10.3333
704	10.3333
705	10.3333
706	10.3333
707	10.3333
708	10.3333
709	10.3333
710	10.3333
711	10.3333
712	10.3333
713	10.3333
714	10.3333
715	10.3333
716	10.3333
717	10.3333
718	10.3333
719	10.3333
720	10.3333
721	10.3333
722	10.3333
723	10.3333
724	10.3333
725	10.3333
726	10.3333
727	10.3333
728	10.3333
729	10.3333
730	10.3333
731	10.3333
732	10.3333
733	10.3333
734	10.3333
735	10.3333
736	10.3333
737	10.3333
738	10.3333
739	10.3333
740	10.3333
741	10.3333
742	10.3333
743	10.3333
744	10.3333
745	10.3333
746	10.3333
747	10.3333
748	10.3333
749	10.3333
750	10.3333
751	10.3333
752	10.3333
753	10.3333
754	10.3333
755	10.4167
756	10.4167
757	10.4167
758	10.4167
759	10.4167
760	10.4167
761	10.4167
762	10.4167
763	10.4167
764	10.4167
765	10.4167
766	10.4167
767	10.4167
768	10.4167
769	10.4167
770	10.4167
771	10.4167
772	10.4167
773	10.4167
774	10.4167
775	10.4167
776	10.4167
777	10.4167
778	10.4167
779	10.4167
780	10.4167
781	10.4167
782	10.4167
783	10.4167
784	10.4167
785	10.4167
786	10.4167
787	10.4167
788	10.4167
789	10.4167
790	10.4167
791	10.4167
792	10.4167
793	10.4167
794	10.4167
795	10.4167
796	10.4167
797	10.4167
798	10.4167
799	10.4167
800	10.4167
801	10.4167
802	10.4167
803	10.4167
804	10.4167
805	10.4167
806	10.4167
807	10.4167
808	10.4167
809	10.4167
810	10.4167
811	10.4167
812	10.4167
813	10.4167
814	10.4167
815	10.4167
816	10.4167
817	10.4167
818	10.4167
819	10.4167
820	10.4167
821	10.4167
822	10.4167
823	10.4167
824	10.4167
825	10.4167
826	10.4167
827	10.4167
828	10.4167
829	10.4167
830	10.4167
831	10.4167
832	10.4167
833	10.4167
834	10.4167
835	10.4167
836	10.4167
837	10.4167
838	10.4167
839	10.4167
840	10.4167
841	10.4167
842	10.4167
843	10.5
844	10.5
845	10.5
846	10.5
847	10.5
848	10.5
849	10.5
850	10.5
851	10.5
852	10.5
853	10.5
854	10.5
855	10.5
856	10.5
857	10.5
858	10.5
859	10.5
860	10.5
861	10.5
862	10.5
863	10.5
864	10.5
865	10.5
866	10.5
867	10.5
868	10.5
869	10.5
870	10.5
871	10.5
872	10.5
873	10.5
874	10.5
875	10.5
876	10.5
877	10.5
878	10.5
879	10.5
880	10.5
881	10.5
882	10.5
883	10.5
884	10.5
885	10.5
886	10.5
887	10.5
888	10.5
889	10.5
890	10.5
891	10.5
892	10.5
893	10.5
894	10.5
895	10.5
896	10.5
897	10.5
898	10.5
899	10.5
900	10.5
901	10.5
902	10.5
903	10.5
904	10.5
905	10.5
906	10.5
907	10.5
908	10.5
909	10.5
910	10.5
911	10.5
912	10.5
913	10.5
914	10.5
915	10.5
916	10.5833
917	10.5833
918	10.5833
919	10.5833
920	10.5833
921	10.5833
922	10.5833
923	10.5833
924	10.5833
925	10.5833
926	10.5833
927	10.5833
928	10.5833
929	10.5833
930	10.5833
931	10.5833
932	10.5833
933	10.5833
934	10.5833
935	10.5833
936	10.5833
937	10.5833
938	10.5833
939	10.5833
940	10.5833
941	10.5833
942	10.5833
943	10.5833
944	10.5833
945	10.5833
946	10.5833
947	10.5833
948	10.5833
949	10.5833
950	10.5833
951	10.5833
952	10.5833
953	10.5833
954	10.5833
955	10.6667
956	10.6667
957	10.6667
958	10.6667
959	10.6667
960	10.6667
961	10.6667
962	10.6667
963	10.6667
964	10.6667
965	10.6667
966	10.6667
967	10.6667
968	10.6667
969	10.6667
970	10.6667
971	10.6667
972	10.6667
973	10.6667
974	10.6667
975	10.6667
976	10.6667
977	10.6667
978	10.6667
979	10.6667
980	10.6667
981	10.6667
982	10.6667
983	10.6667
984	10.75
985	10.75
986	10.75
987	10.75
988	10.75
989	10.75
990	10.75
991	10.75
992	10.75
993	10.75
994	10.8333
995	10.8333
996	10.8333
997	10.8333
998	10.8333
999	10.9167
1000	11
1001
1002
1003
1004
1005
1006
1007
1008
1009
1010
